# Supplementary material for: Synthesis and bioactivity of analogues of the marine antibiotic tropodithietic acid
Source: publisher site journal article supplement (doi:10.3762/bjoc.10.188), 2014-08-06
Supplement: Additional file 1 [file 1860-5397-10-188-S1.pdf]

**Supporting Information**  
**for**  
**Synthesis and bioactivity of analogues of the marine**  
**antibiotic tropodithietic acid**

Patrick Rabe<sup>1</sup>, Tim A. Klapschinski<sup>1</sup>, Nelson L. Brock<sup>1</sup>, Christian A. Citron<sup>1</sup>, Paul D'Alvise<sup>2</sup>, Lone Gram<sup>2</sup> and Jeroen S. Dickschat\*<sup>1</sup>

Address: <sup>1</sup>Kekulé-Institut für Organische Chemie, Rheinische Friedrich-Wilhelms-Universität Bonn, Gerhard-Domagk-Straße 1, 53121 Bonn, Germany and

<sup>2</sup>Department of Systems Biology, Technical University of Denmark, Matematiktorvet bldg. 301, 2800 Kongens Lyngby, Denmark

Email: Jeroen S. Dickschat - dickschat@uni-bonn.de

\*Corresponding author

**Synthetic procedures, compound characterisation data and**  
**copies of NMR spectra**

## GENERAL METHODS

Chemicals were purchased from Acros Organics (Geel, Belgium) or Sigma Aldrich Chemie GmbH (Steinheim, Germany) and used without further purification. All non-aqueous reactions were performed under an inert atmosphere (N<sub>2</sub>) in flame-dried flasks. Solvents were purified by distillation and dried according to standard methods. Thin-layer chromatography was performed with 0.2 mm precoated plastic sheets Polygram® Sil G/UV254 (Machery-Nagel). Column chromatography was carried out using Merck silica gel 60 (70-200 mesh). <sup>1</sup>H-NMR and <sup>13</sup>C-NMR spectra were recorded on Bruker DRX-400 (400 MHz), AV III-400 (400 MHz) or AV II-600 (600 MHz) spectrometers, and were referenced against TMS ( $\delta = 0.00$  ppm) for <sup>1</sup>H-NMR and CDCl<sub>3</sub> ( $\delta = 77.01$  ppm) or C<sub>6</sub>D<sub>6</sub> ( $\delta = 128.1$  ppm) for <sup>13</sup>C-NMR. UV spectra were obtained using a Varian Cary 100 Bio, and IR spectra were recorded with a Bruker Tensor 27 ATR (attenuated total reflectance). GC-MS analyses were carried out with an HP6890 gas chromatograph connected to an HP5973 mass selective detector fitted with a BPX-5 fused silica capillary column (25 m, 0.25 mm i. d., 0.25  $\mu$ m film). Instrumental parameters were (1) inlet pressure, 77.1 kPa, He 23.3 mL min<sup>-1</sup>, (2) injection volume, 2  $\mu$ L, (3) transfer line, 300°C, and (4) electron energy 70 eV. The GC was programmed as follows: 5 min at 50°C increasing at 10°C min<sup>-1</sup> to 320°C, and operated in split mode (20:1, 60 s valve time). The carrier gas was He at 1 mL min<sup>-1</sup>. Retention indices (*I*) were determined from a homologous series of *n*-alkanes (C<sub>8</sub>-C<sub>38</sub>). Polar compounds with free hydroxy or carboxylic acid functions were derivatised with *N*-methyl-*N*-trimethylsilyltrifluoroacetamide (MSTFA) prior to analysis.

## SYNTHESIS OF COMPOUNDS

*tert*-Butyl 2-(1,6-dihydroxycyclohex-2-en-1-yl)acetate (**9a**): Following the procedure of Do et al. [1], a stirred solution of 2-cyclohexen-1-one (**6**) (5.77 g, 60 mmol, 1.0 eq.) in dry THF (100 mL) was treated with TMS-Cl (7.82 g, 72 mmol, 1.2 eq.). The mixture was stirred for 20 min at 0°C and then a solution of NaHMDS (2 M in THF, 34.5 mL, 69 mmol, 1.15 eq.) was added. The mixture was stirred for 2 h at 0°C, followed by dilution with CH<sub>2</sub>Cl<sub>2</sub>. The organic layer was washed with H<sub>2</sub>O and dried over K<sub>2</sub>CO<sub>3</sub>. The mixture was concentrated under reduced pressure and the residue taken up with 200 mL of CH<sub>2</sub>Cl<sub>2</sub> and cooled to 0°C. Slowly *m*CPBA (15.5 g, 90 mmol, 2.5 eq.) was added in portions and stirring was continued for 2 h at 0°C and over night at room temperature. Hexane was added and the precipitate filtered off. Evaporation of the solvent gave **7** which was used in the next step without further purification.

HN*i*Pr<sub>2</sub> (1.34 g, 13.3 mmol, 1.6 eq.) was dissolved in THF (14 mL) and cooled to 0°C. A 1.6 M solution of *n*BuLi (8.3 mL, 13.3 mmol, 1.6 eq.) was added and stirred for 30 min at 0°C. The mixture was cooled to -78°C and *tert*-butyl acetate (1.36 g, 8.32 mmol, 1.0 eq.) was added dropwise. Stirring was continued for 40 min at -78°C and then **7** (1.53 g, 8.3 mmol, 1.0 eq.) was added dropwise. The reaction was stirred for 2 h at -78°C and was then quenched by the addition of a sat. solution of NaHCO<sub>3</sub>. The aqueous phase was extracted three times with ethyl acetate, dried over K<sub>2</sub>CO<sub>3</sub> and concentrated under reduced pressure to yield crude **8a**. The residue was taken up with THF (20 mL) and cooled to 0°C. A solution of TBAF (1 M in THF, 7.3 mL, 7.3 mmol, 1.1 eq.) was added and stirring was continued for 1 h at 0°C. The solution was diluted with ethyl acetate and washed with H<sub>2</sub>O. The organic layer was dried over MgSO<sub>4</sub> and concentrated under reduced pressure. Column chromatography on silica gel with hexane/ethyl acetate (2:1) yielded **9a** (1.13 g, 4.94 mmol, 24% over 4 steps)

as colorless oil. TLC (hexane/ethyl acetate 2:1)  $R_F = 0.24$ .  $^1\text{H}$  NMR (400 MHz,  $\text{CDCl}_3$ )  $\delta = 5.83$  (ddd,  $^3J_{\text{H,H}} = 9.7$  Hz,  $^3J_{\text{H,H}} = 4.5$  Hz,  $^3J_{\text{H,H}} = 2.8$  Hz, 1H, CH), 5.65 (ddd,  $^3J_{\text{H,H}} = 9.9$  Hz,  $^4J_{\text{H,H}} = 2.5$  Hz,  $^4J_{\text{H,H}} = 1.7$  Hz, 1H, CH), 4.23 (br s, 1H, OH), 3.58 (dd,  $^3J_{\text{H,H}} = 9.6$  Hz,  $^3J_{\text{H,H}} = 4.0$  Hz, 1H, CH), 2.84 (br s, 1H, OH), 2.70 (d,  $^2J_{\text{H,H}} = 15.5$  Hz, 1H,  $\text{CH}_2$ ), 2.42 (d,  $^2J_{\text{H,H}} = 15.5$  Hz, 1H,  $\text{CH}_2$ ), 2.24 – 2.17 (m, 1H,  $\text{CH}_2$ ), 2.10 – 2.00 (m, 1H,  $\text{CH}_2$ ), 1.87 – 1.74 (m, 2H,  $\text{CH}_2$ ), 1.48 (s,  $^1J_{\text{C,H}} = 127.0$  Hz, 9H, 3x  $\text{CH}_3$ ) ppm.  $^{13}\text{C}$  NMR (100 MHz,  $\text{CDCl}_3$ )  $\delta = 172.5$  ( $\text{C}_q$ ), 130.4 (CH), 129.3 (CH), 81.9 ( $\text{C}_q$ ), 72.0 ( $\text{C}_q$ ), 69.8 ( $\text{CH}_2$ ), 43.6 ( $\text{CH}_2$ ), 28.1 (3x  $\text{CH}_3$ ), 26.4 ( $\text{CH}_2$ ), 23.9 ( $\text{CH}_2$ ) ppm. IR (ATR)  $\tilde{\nu} = 3397$  (br), 3338 (br), 2982 (w), 2936 (w), 2913 (w), 2838 (w), 1725 (s), 1362 (m), 1345 (s), 1215 (m), 1149 (s), 1133 (s), 1056 (s), 1013 (m), 963 (m), 781 (m)  $\text{cm}^{-1}$ . MS (EI, 70 eV)  $m/z$  (%) = 228 (<1)  $[\text{M}]^+$ , 184 (2), 172 (6), 154 (21), 137 (36), 128 (100), 110 (55), 95 (30), 83 (22), 68 (45), 57 (94), 41 (48). GC (BPX-5)  $I = 1585$ . HR-MS (ESI+, MSTFA) calc. for  $\text{C}_{18}\text{H}_{36}\text{O}_4\text{Si}_2\text{Na}^+$ :  $m/z = 395.20444$ ; found:  $m/z = 395.20465$ .

*tert*-Butyl 2-hydroxycyclohepta-1,3,6-triene-1-carboxylate (**10a**) and *tert*-butyl 7-oxocyclohepta-1,5-diene-1-carboxylate (**11a**): Compound **9a** (3.3 g, 14.5 mmol, 1.0 eq.) was dissolved in THF/ $\text{H}_2\text{O}$  (4:1, 280 mL).  $\text{NaIO}_4$  (3.7 g, 17.4 mmol, 1.2 eq.) was added and the reaction was stirred for 2 h at room temperature. The mixture was filtered and concentrated under reduced pressure. The residue was taken up with  $\text{CH}_2\text{Cl}_2$  (60 mL) and treated with silica gel (29 g). The reaction mixture was stirred over night at room temperature, filtered again and concentrated under reduced pressure. Column chromatography on silica gel with hexane/ethyl acetate (gradient from 10:1 to 3:1) yielded **10a** (543 mg, 2.61 mmol, 18%) and **11a** (602 mg, 2.89 mmol, 20%) as colorless oils.

Analytical data for **10a**: TLC (hexane/ethyl acetate 10:1)  $R_F = 0.31$ .  $^1\text{H}$  NMR (400 MHz,  $\text{CDCl}_3$ )  $\delta = 12.9$  (s, 1H, OH), 6.39 (d,  $^3J_{\text{H,H}} = 9.8$  Hz, 1H, CH), 6.13 (d,  $^3J_{\text{H,H}} = 10.2$  Hz, 1H, CH), 5.97 (dt,  $^3J_{\text{H,H}} = 10.1$  Hz,  $^3J_{\text{H,H}} = 7.1$  Hz, 1H, CH), 5.30 (dt,  $^3J_{\text{H,H}} = 9.8$  Hz,  $^3J_{\text{H,H}} = 6.7$  Hz, 1H, CH), 2.37 (t,  $^3J_{\text{H,H}} = 6.9$  Hz,  $^1J_{\text{C,H}} = 131.5$  Hz, 2H,  $\text{CH}_2$ ), 1.56 (s,  $^1J_{\text{C,H}} = 127.0$  Hz, 9H, 3x  $\text{CH}_3$ ) ppm.  $^{13}\text{C}$  NMR (100 MHz,  $\text{CDCl}_3$ )  $\delta = 172.3$  ( $\text{C}_q$ ), 169.9 ( $\text{C}_q$ ), 133.6 (CH), 124.8 (CH), 123.9 (CH), 117.5 (CH), 106.7 ( $\text{C}_q$ ), 82.2 ( $\text{C}_q$ ), 28.2 (3x  $\text{CH}_3$ ), 27.1 ( $\text{CH}_2$ ) ppm. IR (ATR)  $\tilde{\nu} = 3040$  (w), 2977 (w), 2933 (w), 2884 (w), 2840 (w), 1647 (m), 1547 (m), 1397 (m), 1321 (s), 1233 (s), 1144 (s), 1055 (w), 838 (m), 736 (m)  $\text{cm}^{-1}$ . UV-Vis ( $\text{CH}_2\text{Cl}_2$ )  $\lambda_{\text{max}}$  ( $\log \epsilon$ ) = 313 (3.69), 264 (3.58), 229 (3.89) nm. MS (EI, 70 eV)  $m/z$  (%) = 208 (3)  $[\text{M}]^+$ , 152 (28), 134 (100), 106 (54), 77 (64), 57 (35), 41 (39). GC (BPX-5)  $I = 1475$ . HR-MS (EI+) calc. for  $\text{C}_{12}\text{H}_{16}\text{O}_3^+$ :  $m/z = 208.10940$ ; found:  $m/z = 208.11103$ .

Analytical data for **11a**: TLC (hexane/ethyl acetate 3:1)  $R_F = 0.37$ .  $^1\text{H}$  NMR (400 MHz,  $\text{C}_6\text{D}_6$ )  $\delta = 6.86$  (t,  $^3J_{\text{H,H}} = 6.7$  Hz, 1H, CH), 6.02 (dt,  $^3J_{\text{H,H}} = 12.1$  Hz,  $^3J_{\text{H,H}} = 1.7$  Hz, 1H, CH), 5.83 (dt,  $^3J_{\text{H,H}} = 12.1$  Hz,  $^3J_{\text{H,H}} = 5.2$  Hz, 1H, CH), 1.69 – 1.64 (m, 2H,  $\text{CH}_2$ ), 1.56 – 1.52 (m, 2H,  $\text{CH}_2$ ), 1.44 (s, 9H, 3x  $\text{CH}_3$ ) ppm.  $^{13}\text{C}$  NMR (100 MHz,  $\text{C}_6\text{D}_6$ )  $\delta = 190.5$  ( $\text{C}_q$ ), 165.9 ( $\text{C}_q$ ), 144.3 (CH), 143.2 (CH), 141.9 ( $\text{C}_q$ ), 133.0 (CH), 128.6 (CH), 81.3 ( $\text{C}_q$ ), 28.4 (3x  $\text{CH}_3$ ), 26.8 ( $\text{CH}_2$ ), 26.1 ( $\text{CH}_2$ ) ppm. IR (ATR)  $\tilde{\nu} = 3040$  (w), 2978 (w), 2934 (w), 2839 (w), 1646 (m), 1547 (m), 1397 (m), 1321 (m), 1234 (s), 1144 (s), 838 (m), 710 (m)  $\text{cm}^{-1}$ . UV-Vis ( $\text{CH}_2\text{Cl}_2$ )  $\lambda_{\text{max}}$  ( $\log \epsilon$ ) = 313 (3.68), 265 (3.58), 228 (3.89) nm. MS (EI, 70 eV)  $m/z$  (%) = 208 (<1)  $[\text{M}]^+$ , 153 (67), 135 (100), 107 (45), 93 (27), 79 (92), 57 (98), 39 (71). GC (BPX-5)  $I = 1611$ . HR-MS (EI+) calc. for  $\text{C}_{12}\text{H}_{16}\text{O}_3^+$ :  $m/z = 208.10940$ ; found:  $m/z = 208.11359$ .

*tert*-Butyl 7-oxocyclohepta-1,3,5-triene-1-carboxylate (**12a**): Compounds **10a** and **11a** (1.03 g, 4.95 mmol, 1.0 eq.) were dissolved in CH<sub>2</sub>Cl<sub>2</sub> (25 mL). NEt<sub>3</sub> (550 mg, 5.45 mmol, 1.1 eq.) was added and stirring was continued for 30 min at room temperature. DDQ (1.1 g, 4.95 mmol, 1.0 eq.) was added, followed by stirring for another 15 min. The solvent was removed under reduced pressure and the residue was purified by column chromatography on silica gel with hexane/ethyl acetate (2:1) to yield **12a** (368 mg, 1.79 mmol, 39%) as colorless oil. TLC (hexane/ethyl acetate 2:1) *R*<sub>F</sub> = 0.28. <sup>1</sup>H NMR (400 MHz, CDCl<sub>3</sub>) δ = 7.39 (dd, <sup>3</sup>*J*<sub>H,H</sub> = 8.0 Hz, <sup>4</sup>*J*<sub>H,H</sub> = 1.4 Hz, 1H, CH), 7.14 – 6.95 (m, 4H, 4x CH), 1.57 (s, <sup>1</sup>*J*<sub>C,H</sub> = 127.0 Hz, 9H, 3x CH<sub>3</sub>) ppm. <sup>13</sup>C NMR (100 MHz, CDCl<sub>3</sub>) δ = 184.5 (C<sub>q</sub>), 166.6 (C<sub>q</sub>), 145.2 (C<sub>q</sub>), 142.9 (CH), 135.9 (CH), 135.0 (CH), 134.5 (CH), 133.1 (CH), 82.7 (C<sub>q</sub>), 28.0 (3x CH<sub>3</sub>) ppm. IR (ATR)  $\tilde{\nu}$  = 2979 (w), 2934 (w), 1719 (s), 1632 (m), 1584 (s), 1461 (w), 1294 (s), 1240 (m), 1155 (s), 1070 (m), 839 (m), 785 (m) cm<sup>-1</sup>. UV-Vis (CH<sub>2</sub>Cl<sub>2</sub>)  $\lambda_{\text{max}}$  (log  $\epsilon$ ) = 313 (3.75), 304 (3.77), 231 (4.18) nm. MS (EI, 70 eV) *m/z* (%) = 206 (6) [M]<sup>+</sup>, 151 (33), 133 (61), 105 (100), 77 (77), 51 (66), 41 (41). GC (BPX-5) *I* = 1675. HR-MS (EI+) calc. for C<sub>12</sub>H<sub>14</sub>O<sub>3</sub><sup>+</sup>: *m/z* = 206.09375; found: *m/z* = 208.09697.

7-Oxocyclohepta-1,3,5-triene-1-carboxylic acid (**13**): Compound **12a** (103 mg, 0.5 mmol, 1.0 eq.) was stirred in TFA (1 mL) at room temperature for 2 h. Co-evaporation of all volatile constituents with toluene gave analytically pure **13** (67 mg, 0.45 mmol, 90%) as colorless solid. TLC (hexane/ethyl acetate 1:1) *R*<sub>F</sub> = 0.23. <sup>1</sup>H NMR (400 MHz, CDCl<sub>3</sub>) δ = 15.2 (br s, 1H, OH), 8.91 (d, <sup>3</sup>*J*<sub>H,H</sub> = 8.1 Hz, 1H, CH), 7.55 – 7.44 (m, 4H, 4x CH) ppm. <sup>13</sup>C NMR (100 MHz, CDCl<sub>3</sub>) δ = 189.1 (C<sub>q</sub>), 166.1 (C<sub>q</sub>), 146.0 (CH), 144.6 (CH), 140.9 (CH), 139.1 (CH), 135.1 (CH), 134.8 (C<sub>q</sub>) ppm. IR (ATR)  $\tilde{\nu}$  = 3042 (w), 2513 (w), 2371 (w), 1710 (m), 1617 (w), 1427 (s), 1284 (w), 1229 (m), 986 (m),

877 (m), 787 (m), 631 (s), 572 (s)  $\text{cm}^{-1}$ . UV-Vis ( $\text{CH}_2\text{Cl}_2$ )  $\lambda_{\text{max}}$  ( $\log \epsilon$ ) = 355 (3.66), 316 (3.76), 234 (4.23) nm. MS (EI, 70 eV, MSTFA)  $m/z$  (%) = 222 (3)  $[\text{M}]^+$ , 207 (100), 179 (37), 163 (53), 135 (34), 105 (43), 89 (18), 77 (50), 51 (31). GC (BPX-5, MSTFA)  $I$  = 1660. HR-MS (ESI+) calc. for  $\text{C}_8\text{H}_6\text{O}_3\text{Na}^+$ :  $m/z$  = 173.02091; found:  $m/z$  = 173.02096.

*tert*-Butyl 3-hydroxypent-4-enoate (**16**): To a cooled ( $0^\circ\text{C}$ ) solution of diisopropylamine (11.0 g, 110.0 mmol, 1.1 eq., 0.2 M in abs. THF) was added dropwise *n*-BuLi (1.6 M in hexane, 68.8 mL, 110.0 mmol, 1.1 eq.). The mixture was stirred for 60 min at  $0^\circ\text{C}$  and then cooled to  $-78^\circ\text{C}$ . *tert*-Butyl acetate (11.6 g, 100.0 mmol, 1.0 eq.) was added and the reaction mixture was stirred for 2 h at  $-78^\circ\text{C}$ , followed by the dropwise addition of freshly distilled acrolein (5.6 g, 100.0 mmol, 1.0 eq.). Stirring was continued for 3 h at room temperature. The reaction was hydrolyzed by addition of distilled water, followed by extraction with ethyl acetate. The combined organic layers were dried over  $\text{MgSO}_4$  and concentrated under reduced pressure. Column chromatography on silica gel with hexane/ethyl acetate (5:1) yielded the  $\beta$ -hydroxyester **16** (16.2 g, 84 mmol, 94%) as a colorless oil. TLC (hexane/ethyl acetate 5:1)  $R_f$  = 0.25.  $^1\text{H}$  NMR (400 MHz,  $\text{CDCl}_3$ )  $\delta$  = 5.88 (ddd,  $^3J_{\text{H,H}}$  = 5.5 Hz,  $^3J_{\text{H,H}}$  = 10.5 Hz,  $^3J_{\text{H,H}}$  = 17.2 Hz, 1H, CH), 5.30 (ddd,  $^2J_{\text{H,H}}$  = 1.4 Hz,  $^3J_{\text{H,H}}$  = 17.2 Hz,  $^4J_{\text{H,H}}$  = 1.5 Hz, 1H,  $\text{CH}_2$ ), 5.14 (ddd,  $^2J_{\text{H,H}}$  = 1.4 Hz,  $^3J_{\text{H,H}}$  = 10.5 Hz,  $^4J_{\text{H,H}}$  = 1.4 Hz, 1H,  $\text{CH}_2$ ), 4.46 – 4.52 (m, 1H, CH), 3.18 (br s, 1H, OH), 2.51 (dd,  $^2J_{\text{H,H}}$  = 16.1 Hz,  $^3J_{\text{H,H}}$  = 4.2 Hz, 1H,  $\text{CH}_2$ ), 2.43 (dd,  $^2J_{\text{H,H}}$  = 16.1 Hz,  $^3J_{\text{H,H}}$  = 8.2 Hz, 1H,  $\text{CH}_2$ ), 1.46 (s,  $^1J_{\text{C,H}}$  = 126.9 Hz, 9H, 3x  $\text{CH}_3$ ) ppm.  $^{13}\text{C}$  NMR (100 MHz,  $\text{CDCl}_3$ )  $\delta$  = 171.6 ( $\text{C}_q$ ), 138.9 (CH), 115.1 ( $\text{CH}_2$ ), 81.4 ( $\text{C}_q$ ), 69.0 (CH), 42.1 ( $\text{CH}_2$ ), 28.1 (3x  $\text{CH}_3$ ) ppm. IR (ATR)  $\tilde{\nu}$  = 3434 (br), 2980 (w), 2934 (w), 1710 (s), 1477 (w), 1425 (w), 1393 (w),

1368 (m), 1285 (w), 1255 (m), 1152 (s), 1038 (w), 993 (w), 953 (w), 923 (m), 842 (m)  $\text{cm}^{-1}$ .  $\lambda_{\text{max}}$  ( $\log \epsilon$ ) = 269 (1.64), 229 (1.92) nm. MS (EI, 70 eV)  $m/z$  (%) = 172 (<1)  $[\text{M}]^+$ , 116 (26), 98 (28), 81 (4), 70 (8), 57 (100), 41 (46). GC (BPX-5)  $I$  = 1118.

*tert*-Butyl 3-oxopent-4-enoate (**17**): Jones' reagent ( $\text{CrO}_3$ , 8.98 g, 89.8 mmol, 1.5 eq., dissolved in 67 mL  $\text{H}_2\text{O}$  and 8 mL  $\text{H}_2\text{SO}_4$ ) was added dropwise to a solution of  $\beta$ -hydroxyester **16** (10.5 g, 61 mmol, 1.0 eq.) in acetone (200 mL) at  $0^\circ\text{C}$ . The reaction mixture was stirred for 3 h at room temperature. Methanol was added to quench excess Jones' reagent, followed by extraction with ethyl acetate. The combined organic layers were dried over  $\text{MgSO}_4$  and concentrated under reduced pressure. Column chromatography on silica gel with hexane/ethyl acetate (10:1) yielded the  $\beta$ -ketoester **17** (9.34 g, 54.9 mmol, 90%) as orange oil. TLC (hexane/ethyl acetate 10:1)  $R_F$  = 0.45.  $^1\text{H}$  NMR (400 MHz,  $\text{CDCl}_3$ )  $\delta$  = 11.94 (s, 1H, OH, enol form), 6.41 (dd,  $^3J_{\text{H,H}}$  = 10.5 Hz,  $^3J_{\text{H,H}}$  = 17.6 Hz, 1H, CH, keto form), 6.26 (d,  $^3J_{\text{H,H}}$  = 17.6 Hz, 1H,  $\text{CH}_2$ , keto form), 6.06 (m, 2H, enol form), 5.94 (d,  $^3J_{\text{H,H}}$  = 10.5 Hz, 1H,  $\text{CH}_2$ , keto form), 5.50 (m, 1H, enol form), 4.99 (s, 1H, enol form), 3.54 (s, 2H,  $\text{CH}_2$ , keto form), 1.50 (s, 9H, 3x  $\text{CH}_3$ , enol form), 1.46 (s, 9H, 3x  $\text{CH}_3$ , keto form) ppm.  $^{13}\text{C}$  NMR (100 MHz,  $\text{CDCl}_3$ )  $\delta$  = 193.0 ( $\text{C}_q$ , keto form), 172.6 ( $\text{C}_q$ ), 168.1 ( $\text{C}_q$ ), 166.3 ( $\text{C}_q$ ), 135.9 (CH, keto form), 131.4 (CH, enol form), 129.7 ( $\text{CH}_2$ , keto form), 121.9 ( $\text{CH}_2$ , enol form), 93.4 (CH, enol form), 82.0 ( $\text{C}_q$ , keto form), 81.0 ( $\text{C}_q$ , enol form), 47.8 ( $\text{CH}_2$ , keto form), 28.2 (3x  $\text{CH}_3$ , enol form), 27.9 (3x  $\text{CH}_3$ , keto form) ppm. IR (ATR)  $\tilde{\nu}$  = 3430 (br), 2965 (m), 1713 (s), 1651 (m), 1588 (w), 1457 (w), 1415 (w), 1395 (w), 1369 (m), 1321 (w), 1256 (s), 1144 (s), 1085 (s), 1014 (s), 800 (s), 686 (w)  $\text{cm}^{-1}$ .  $\lambda_{\text{max}}$  ( $\log \epsilon$ ) = 259 (3.15), 228 (3.06) nm. MS (EI, 70 eV)  $m/z$  (%) = 170 (1)  $[\text{M}]^+$ , 152 (1), 115 (10), 97 (38), 69 (40), 57 (100), 41 (84). GC (BPX-5)  $I$  = 1110.



*tert*-Butyl 3-((trimethylsilyl)oxy)penta-2,4-dienoate (**18**): To a solution of the  $\beta$ -ketoester **17** (9.3 g, 55.0 mmol, 1.0 eq.) in dry benzene (150 mL) was added triethylamine (8.3 g, 82.5 mmol, 1.5 eq.) and trimethylsilyl chloride (8.9 g, 82.5 mmol, 1.5 eq.). After stirring for 24 h the reaction was hydrolyzed by addition of distilled water, followed by extraction with ethyl acetate. The combined organic layers were dried over MgSO<sub>4</sub> and concentrated under reduced pressure to yield the silyl enol ether **18** (12.9 g, 53.0 mmol, 97%) as mixture of *E* and *Z* stereoisomers (2:3, not assigned) which was sufficiently pure to be used without further purification. Note that the minor impurity that can be observed in the NMR spectra is compound **17** that is formed by degradation of **18** during recording of the NMR spectra due to its instability in solution. GC/MS analysis showed that the product is free from starting material **17**.

<sup>1</sup>H NMR (400 MHz, CDCl<sub>3</sub>)  $\delta$  = 7.57 (dd, <sup>3</sup>J<sub>H,H</sub> = 10.6 Hz, <sup>3</sup>J<sub>H,H</sub> = 17.2 Hz, 1H, CH, major stereoisomer), 6.14 (dd, <sup>3</sup>J<sub>H,H</sub> = 10.5 Hz, <sup>3</sup>J<sub>H,H</sub> = 17.1 Hz, 1H, CH, minor stereoisomer), 5.82 (ddd, <sup>5</sup>J<sub>H,H</sub> = 0.6 Hz, <sup>2</sup>J<sub>H,H</sub> = 2.2 Hz, <sup>3</sup>J<sub>H,H</sub> = 17.1 Hz, 1H, CH<sub>2</sub>, major stereoisomer), 5.73 (ddd, <sup>3</sup>J<sub>H,H</sub> = 17.1 Hz, <sup>5</sup>J<sub>H,H</sub> = 0.5 Hz, <sup>2</sup>J<sub>H,H</sub> = 1.3 Hz, 1H, CH<sub>2</sub>, minor stereoisomer), 5.42 (ddd, <sup>5</sup>J<sub>H,H</sub> = 1.5 Hz, <sup>2</sup>J<sub>H,H</sub> = 2.1 Hz, <sup>3</sup>J<sub>H,H</sub> = 10.6 Hz, 1H, CH<sub>2</sub>, major stereoisomer), 5.33 (ddd, <sup>5</sup>J<sub>H,H</sub> = 0.5 Hz, <sup>2</sup>J<sub>H,H</sub> = 1.3 Hz, <sup>3</sup>J<sub>H,H</sub> = 10.4 Hz, 1H, CH<sub>2</sub>, minor stereoisomer), 5.18 (s, 1H, CH, minor stereoisomer), 4.96 (d, <sup>5</sup>J<sub>H,H</sub> = 1.5 Hz, 1H, CH, major stereoisomer), 1.47 (s, 9H, 3x CH<sub>3</sub>, major stereoisomer), 1.46 (s, 9H, 3x CH<sub>3</sub>, minor stereoisomer), 0.27 (s, 9H, 3x CH<sub>3</sub>, major stereoisomer), 0.26 (s, 9H, 3x CH<sub>3</sub>, minor stereoisomer) ppm. <sup>13</sup>C NMR (100 MHz, CDCl<sub>3</sub>)  $\delta$  = 166.5 (C<sub>q</sub>, major stereoisomer), 165.0 (C<sub>q</sub>, minor stereoisomer), 162.1 (C<sub>q</sub>, major stereoisomer), 160.0 (C<sub>q</sub>, minor stereoisomer), 135.9 (CH, minor stereoisomer), 130.7 (CH, major stereoisomer), 121.0 (CH<sub>2</sub>, major stereoisomer),

120.2 (CH<sub>2</sub>, minor stereoisomer), 104.9 (CH, minor stereoisomer), 103.2 (CH, major stereoisomer), 79.7 (C<sub>q</sub>, major stereoisomer), 79.2 (C<sub>q</sub>, minor stereoisomer), 28.3 (3x CH<sub>3</sub>, major stereoisomer), 28.3 (3x CH<sub>3</sub>, minor stereoisomer), 0.6 (3x CH<sub>3</sub>, minor stereoisomer), 0.1 (3x CH<sub>3</sub>, major stereoisomer) ppm. IR (ATR)  $\tilde{\nu}$  = 2979 (w), 2934 (w), 1734 (w), 1703 (m), 1655 (m), 1635 (m), 1586 (m), 1574 (m), 1456 (w), 1415 (m), 1368 (m), 1301 (w), 1249 (s), 1129 (s), 1064 (m), 1042 (w), 997 (w), 984 (w), 940 (w), 884 (m), 840 (s), 813 (s), 731 (w), 693 (w) cm<sup>-1</sup>.  $\lambda_{\text{max}}$  (log  $\epsilon$ ) = 252 (3.47) nm. MS (EI, 70 eV, minor stereoisomer)  $m/z$  (%) = 243 (<1), 186 (31), 171 (100), 153 (3), 140 (5), 111 (8), 75 (44), 57 (26), 41 (25). MS (EI, 70 eV, major stereoisomer)  $m/z$  (%) = 186 (34), 171 (100), 153 (3), 140 (4), 75 (43), 57 (28), 41 (26). GC (BPX-5)  $I$  = 1288 (minor stereoisomer),  $I$  = 1321 (major stereoisomer).

*tert*-Butyl 1,6,7,7-tetrachloro-3-((trimethylsilyl)oxy)bicyclo[4.1.0]hept-3-ene-2-carboxylate (**19**): A solution of tetrachlorocyclopropene (10.7 g, 60.0 mmol, 2.0 eq.) and the silyl enol ether **18** (mixture of stereoisomers, 7.3 g, 30.0 mmol, 1.0 eq.) in dry toluene (22 mL) was stirred for 72 h under reflux. The reaction mixture was allowed to cool to room temperature and concentrated under reduced pressure. Column chromatography of the residue on silica gel with hexane/ethyl acetate (10:1) yielded the bicyclic Diels-Alder adduct **19** (5.0 g, 11.9 mmol, 40%) as brown oil. <sup>1</sup>H NMR (400 MHz, CDCl<sub>3</sub>)  $\delta$  = 4.70 (dd, <sup>3</sup> $J_{\text{H,H}}$  = 2.7 Hz, <sup>3</sup> $J_{\text{H,H}}$  = 5.5 Hz, 1H, CH), 3.53 (dd, <sup>5</sup> $J_{\text{H,H}}$  = 2.5 Hz, <sup>5</sup> $J_{\text{H,H}}$  = 2.5 Hz, 1H), 3.27 (ddd, <sup>3</sup> $J_{\text{H,H}}$  = 2.7 Hz, <sup>4</sup> $J_{\text{H,H}}$  = 2.7 Hz, <sup>2</sup> $J_{\text{H,H}}$  = 17.8 Hz, 1H, CH<sub>2</sub>), 3.04 (ddd, <sup>5</sup> $J_{\text{H,H}}$  = 2.4 Hz, <sup>3</sup> $J_{\text{H,H}}$  = 5.5 Hz, <sup>2</sup> $J_{\text{H,H}}$  = 17.8 Hz, 1H, CH<sub>2</sub>), 1.49 (s, 9H, 3x CH<sub>3</sub>), 0.18 (s, 9H, 3x CH<sub>3</sub>) ppm. <sup>13</sup>C NMR (100 MHz, CDCl<sub>3</sub>)  $\delta$  = 167.6 (C<sub>q</sub>), 146.0 (C<sub>q</sub>), 101.1 (CH), 82.4 (C<sub>q</sub>), 67.8 (C<sub>q</sub>), 54.8 (C<sub>q</sub>), 54.0 (CH), 52.8 (C<sub>q</sub>), 33.4 (CH<sub>2</sub>), 27.8 (3x CH<sub>3</sub>), 0.2 (3x CH<sub>3</sub>) ppm. IR (ATR)  $\tilde{\nu}$  = 2983 (w), 2934 (w), 1648 (m),

1613 (s), 1450 (w), 1431 (w), 1402 (m), 1368 (m), 1343 (s), 1255 (m), 1210 (m), 1146 (s), 1084 (w), 1057 (w), 967 (w), 922 (w), 898 (w), 866 (m), 844 (s), 824 (s), 787 (m), 737 (w), 694 (w), 627 (m), 605 (m)  $\text{cm}^{-1}$ .  $\lambda_{\text{max}}$  ( $\log \epsilon$ ) = 251 (4.00), 235 (3.80) nm. MS (EI, 70 eV)  $m/z$  (%) = 345 (1)  $[\text{M}-\text{TMS}]^+$ , 319 (8), 283 (26), 247 (34), 174 (18), 93 (17), 73 (59), 57 (100), 41 (30). GC (BPX-5)  $I$  = 2020.

*tert*-Butyl 2,3,4-trichloro-7-oxocyclohepta-1,3-diene-1-carboxylate (**20**) and *tert*-butyl 3,4-dichloro-2-fluoro-7-oxocyclohepta-1,3-diene-1-carboxylate (**21**): A solution of **19** (420 mg, 1.0 mmol, 1.0 eq.) in dry THF (5 mL) was treated with TBAF (1 M in THF, 1.2 mL, 1.2 mmol, 1.2 eq.) and stirred for 1 h at room temperature. The reaction was quenched by addition of distilled water, followed by extraction with ether. The combined organic layers were dried over  $\text{MgSO}_4$  and concentrated under reduced pressure. Column chromatography on silica gel with hexane/ethyl acetate (15:1) yielded the dihydrotropone **20** (49 mg, 0.16 mmol, 16%) and **21** (59 mg, 0.17 mmol, 17%) as orange oils.

Analytical data for **20**: TLC (hexane/ethyl acetate 5:1)  $R_F$  = 0.42.  $^1\text{H}$  NMR (400 MHz,  $\text{C}_6\text{D}_6$ )  $\delta$  = 1.94 (t,  $^3J_{\text{H,H}}$  = 6.3 Hz, 2H,  $\text{CH}_2$ ), 1.62 (t,  $^3J_{\text{H,H}}$  = 6.3 Hz, 2H,  $\text{CH}_2$ ), 1.38 (s, 9 H, 3x  $\text{CH}_3$ ) ppm.  $^{13}\text{C}$  NMR (100 MHz,  $\text{C}_6\text{D}_6$ )  $\delta$  = 191.7 ( $\text{C}_q$ ), 163.1 ( $\text{C}_q$ ), 143.3 ( $\text{C}_q$ ), 138.0 ( $\text{C}_q$ ), 131.1 ( $\text{C}_q$ ), 126.4 ( $\text{C}_q$ ), 84.1 ( $\text{C}_q$ ), 36.9 ( $\text{CH}_2$ ), 31.9 ( $\text{CH}_2$ ), 28.7 (3x  $\text{CH}_3$ ) ppm. IR (ATR)  $\tilde{\nu}$  = 2979 (w), 2933 (w), 1732 (s), 1682 (m), 1590 (w), 1455 (w), 1394 (w), 1369 (m), 1342 (w), 1304 (m), 1246 (s), 1152 (s), 1055 (m), 958 (w), 891 (s), 841 (m), 790 (w), 727 (w), 606 (m)  $\text{cm}^{-1}$ .  $\lambda_{\text{max}}$  ( $\log \epsilon$ ) = 297 (3.93), 229 (3.78) nm. MS (EI, 70 eV)  $m/z$  (%) = 310 (1)  $[\text{M}]^+$ , 265 (2), 255 (23), 237 (100), 210 (34), 183 (12), 146 (16), 111 (22), 75 (7), 57 (60), 41 (99). GC (BPX-5)  $I$  = 1393. HR-MS (CI+) calc. for  $\text{C}_{12}\text{H}_{14}\text{Cl}_3\text{O}_3^+$ :  $m/z$  = 311.00030; found:  $m/z$  = 310.99798.

Analytical data for **21**: TLC (hexane/ethyl acetate 5:1)  $R_F = 0.36$ .  $^1\text{H}$  NMR (400 MHz,  $\text{C}_6\text{D}_6$ )  $\delta = 1.79 - 1.74$  (m, 2H,  $\text{CH}_2$ ),  $1.67 - 1.63$  (m, 2H,  $\text{CH}_2$ ),  $1.46$  (s, 9H, 3x  $\text{CH}_3$ ) ppm.  $^{13}\text{C}$  NMR (100 MHz,  $\text{C}_6\text{D}_6$ )  $\delta = 193.0$  (d,  $^3J_{\text{C,F}} = 10.6$  Hz,  $\text{C}_q$ ),  $164.7$  (d,  $^1J_{\text{C,F}} = 288.2$  Hz,  $\text{C}_q$ ),  $160.6$  (d,  $^3J_{\text{C,F}} = 3.9$  Hz,  $\text{C}_q$ ),  $126.7$  (d,  $^3J_{\text{C,F}} = 7.8$  Hz,  $\text{C}_q$ ),  $124.6$  (d,  $^2J_{\text{C,F}} = 13.2$  Hz,  $\text{C}_q$ ),  $120.6$  (d,  $^2J_{\text{C,F}} = 11.0$  Hz,  $\text{C}_q$ ),  $83.9$  ( $\text{C}_q$ ),  $36.1$  ( $\text{CH}_2$ ),  $28.7$  (3x  $\text{CH}_3$ ),  $28.2$  (d,  $^4J_{\text{C,F}} = 3.1$  Hz,  $\text{CH}_2$ ) ppm.  $^{19}\text{F}$  NMR (188 MHz,  $\text{C}_6\text{D}_6$ )  $\delta = -95.0$  ppm. IR (ATR)  $\tilde{\nu} = 2979$  (w),  $2933$  (w),  $1729$  (s),  $1684$  (m),  $1619$  (m),  $1565$  (w),  $1457$  (w),  $1394$  (w),  $1362$  (s),  $1336$  (m),  $1288$  (w),  $1252$  (s),  $1206$  (w),  $1157$  (s),  $1123$  (s),  $1052$  (w),  $992$  (w),  $893$  (s),  $868$  (w),  $842$  (m),  $797$  (w),  $740$  (w),  $698$  (w),  $622$  (m),  $579$  (w)  $\text{cm}^{-1}$ .  $\lambda_{\text{max}}$  ( $\log \epsilon$ ) =  $291$  (4.09),  $228$  (3.57),  $223$  (3.56) nm. MS (EI, 70 eV)  $m/z$  (%) =  $294$  (1)  $[\text{M}]^+$ ,  $239$  (30),  $221$  (100),  $194$  (43),  $165$  (15),  $130$  (22),  $109$  (10),  $95$  (15),  $75$  (6),  $57$  (73),  $41$  (40). GC (BPX-5)  $I = 1903$ . HR-MS (ESI) calc. for  $\text{C}_{12}\text{H}_{14}\text{Cl}_2\text{FO}_3^+$ :  $m/z = 295.02985$ ; found:  $m/z = 295.03426$ .

*tert*-Butyl 3,4-dichloro-2-methoxy-7-oxocyclohepta-1,3-diene-1-carboxylate (**22**): A solution of **19** (3.0 g, 7.18 mmol, 1.0 eq.) in dry MeOH (72 mL) was treated with  $\text{Na}_2\text{CO}_3$  (0.99 g, 9.33 mmol, 1.3 eq.) and stirred for 12 h at room temperature. The reaction was quenched by addition of distilled water (500 mL), followed by extraction with ether (3 x 200 mL). The combined organic layers were dried over  $\text{MgSO}_4$  and concentrated under reduced pressure. Column chromatography on silica gel with hexane/ethyl acetate (10:1) yielded the dihydrotropones **20** (120 mg, 0.39 mmol, 6%) and **22** (900 mg, 2.94 mmol, 41%) as orange oils.

Analytical data for **22**: TLC (hexane/ethyl acetate 5:1)  $R_F = 0.16$ .  $^1\text{H}$  NMR (400 MHz,  $\text{C}_6\text{D}_6$ )  $\delta = 3.49$  (s, 3H,  $\text{CH}_3$ ),  $2.03$  (t,  $^3J_{\text{H,H}} = 6.7$  Hz, 2H,  $\text{CH}_2$ ),  $1.80$  (t,  $^3J_{\text{H,H}} = 6.8$  Hz, 2H,  $\text{CH}_2$ ),  $1.47$  (s, 9H, 3x  $\text{CH}_3$ ) ppm.  $^{13}\text{C}$  NMR (100 MHz,  $\text{C}_6\text{D}_6$ )  $\delta = 194.2$  ( $\text{C}_q$ ),  $165.0$

(C<sub>q</sub>), 163.9 (C<sub>q</sub>), 129.1 (C<sub>q</sub>), 123.8 (C<sub>q</sub>), 121.9 (C<sub>q</sub>), 82.9 (C<sub>q</sub>), 59.5 (CH<sub>3</sub>), 37.4 (CH<sub>2</sub>), 30.6 (CH<sub>2</sub>), 28.7 (3x CH<sub>3</sub>) ppm. IR (ATR)  $\tilde{\nu}$  = 2981 (w), 2934 (w), 1708 (m), 1662 (s), 1575 (s), 1448 (m), 1418 (w), 1391 (w), 1354 (m), 1324 (s), 1252 (s), 1161 (s), 1138 (s), 1051 (m), 1022 (w), 1008 (w), 981 (w), 942 (w), 887 (s), 867 (m), 846 (m), 801 (m), 761 (w), 739 (m), 632 (m), 600 (m) cm<sup>-1</sup>.  $\lambda_{\max}$  (log  $\epsilon$ ) = 289 (4.19), 228 (3.71) nm. MS (EI, 70 eV)  $m/z$  (%) = 306 (9) [M]<sup>+</sup>, 261 (2); 250 (11), 233 (69), 220 (2), 197 (27), 179 (18), 171 (100), 143 (38), 111 (13), 99 (14), 77 (16), 57 (56). GC (BPX-5)  $I$  = 2040. HR-MS (ESI) calc. for C<sub>13</sub>H<sub>16</sub>Cl<sub>2</sub>O<sub>4</sub>Na<sup>+</sup>:  $m/z$  = 329.03179; found:  $m/z$  = 329.03193.

3,4-Dichloro-2-methoxy-7-oxocyclohepta-1,3-diene-1-carboxylic acid (**23**): The ester **22** (100 mg, 0.33 mmol, 1.0 eq.) was dissolved in CH<sub>2</sub>Cl<sub>2</sub> (3.5 mL) and was treated with TFA (0.5 mL). The mixture was stirred for 45 min. After the reaction was completed, TFA and solvent were evaporated under reduced pressure. The pure acid **23** (81 mg, 32.3  $\mu$ mol, 98 %) was obtained as yellow oil. TLC (hexane/ethyl acetate 1:1)  $R_F$  = 0.15. <sup>1</sup>H NMR (300 MHz, C<sub>6</sub>D<sub>6</sub>)  $\delta$  = 11.82 (s, 1H, COOH), 3.64 (s, 3H, CH<sub>3</sub>), 2.00 (t, <sup>3</sup>J<sub>H,H</sub> = 6.7 Hz, 2H, CH<sub>2</sub>), 1.81 (t, <sup>3</sup>J<sub>H,H</sub> = 6.7 Hz, 2H, CH<sub>2</sub>) ppm. <sup>13</sup>C NMR (75 MHz, C<sub>6</sub>D<sub>6</sub>)  $\delta$  = 200.6 (C<sub>q</sub>), 175.5 (C<sub>q</sub>), 164.3 (C<sub>q</sub>), 131.1 (C<sub>q</sub>), 128.5 (C<sub>q</sub>), 112.5 (C<sub>q</sub>), 63.1 (CH<sub>3</sub>), 36.7 (CH<sub>2</sub>), 29.2 (CH<sub>2</sub>) ppm. IR (ATR)  $\tilde{\nu}$  = 2955 (w), 2861 (w), 1730 (s), 1667 (w), 1569 (s), 1447 (s), 1407 (m), 1345 (s), 1321 (s), 1234 (w), 1181 (w), 1149 (w), 1128 (w), 1049 (w), 1020 (w), 1003 (w), 963 (w), 891 (s), 852 (w), 803 (m), 736 (w), 693 (w), 655 (m), 585 (m) cm<sup>-1</sup>.  $\lambda_{\max}$  (log  $\epsilon$ ) = 301 (3.99), 231 (3.79) nm. HR-MS (ESI) calc. for C<sub>9</sub>H<sub>9</sub>Cl<sub>2</sub>O<sub>4</sub><sup>+</sup>:  $m/z$  = 250.98724; found:  $m/z$  = 250.98735.

## References

1. Y.-S. Do, R. Sun, H. J. Kim, J. E. Yeo, S.-H. Bae, S. Koo, *J. Org. Chem.*, **2009**, *74*, 917–920.

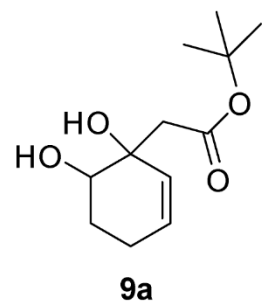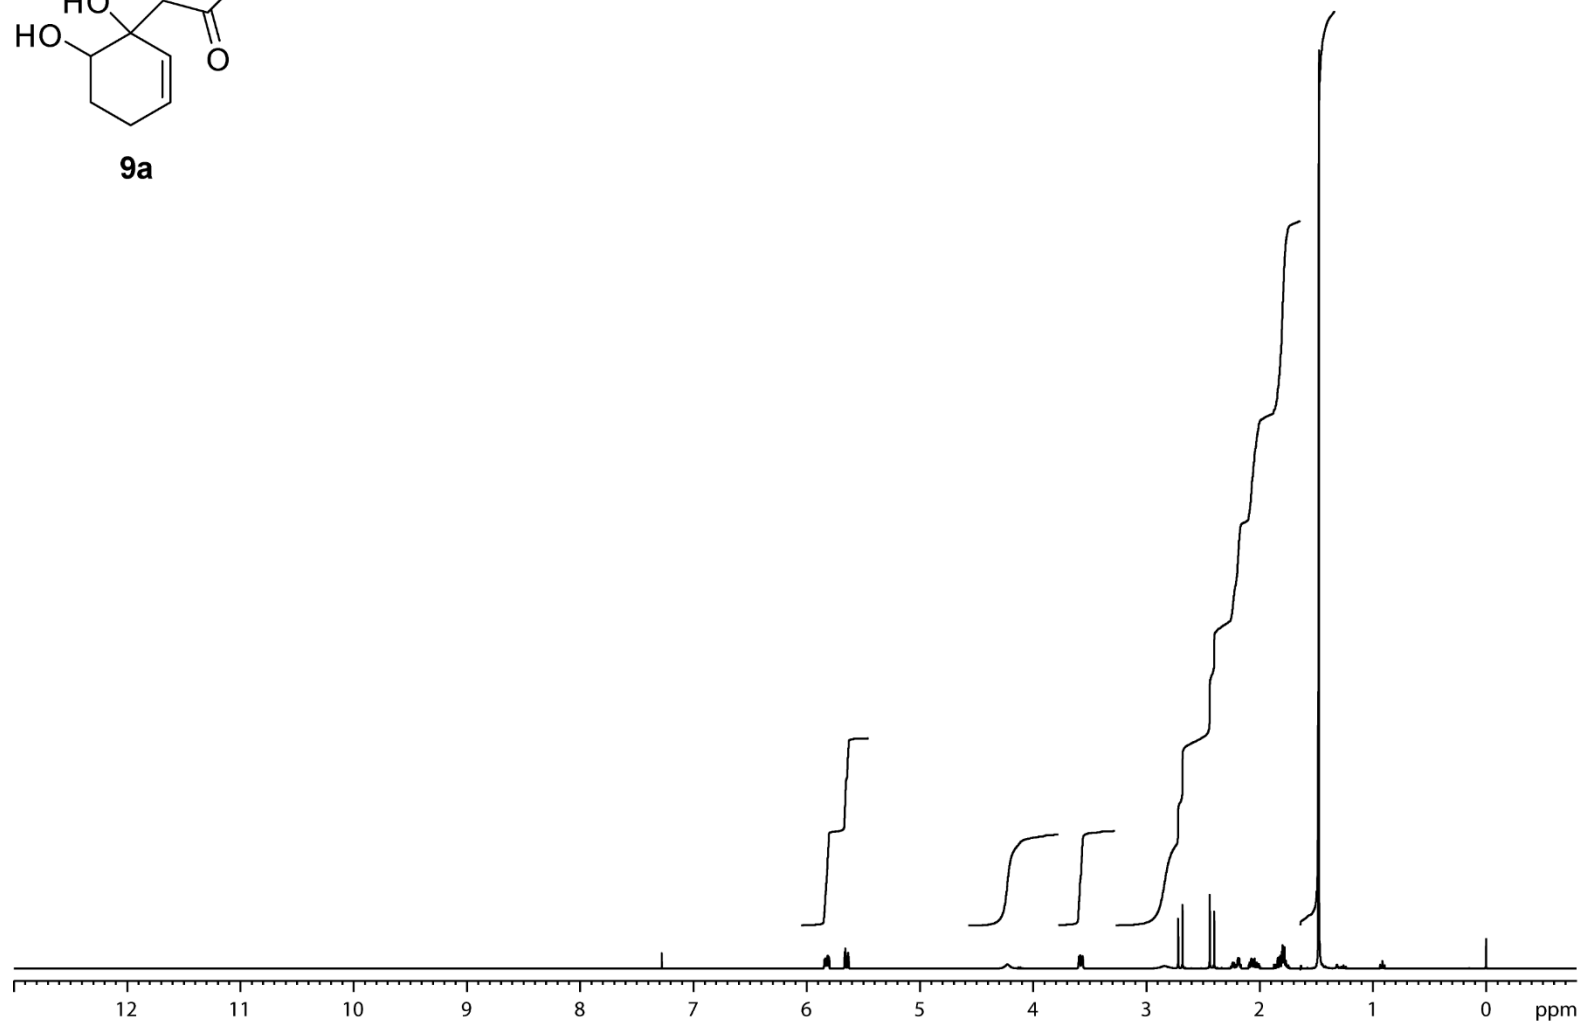

Current Data Parameters  
 NAME brn119886\_od  
 EXPNO 1  
 PROCNO 1

F2 Acquisition Parameters  
 Date\_ 20130226  
 Time 9.54  
 INSTRUM drx400  
 PROBHD 5 mm QNP 1H/13  
 PULPROG zg30  
 TD 65536  
 SOLVENT CDCl3  
 NS 64  
 DS 2  
 SWH 8278.146 Hz  
 FIDRES 0.126314 Hz  
 AQ 3.9584243 sec  
 RG 57  
 DW 60.400 usec  
 DE 6.00 usec  
 TE 298.2 K  
 D1 1.0000000 sec  
 TDO 1

===== CHANNEL f1 =====  
 NUC1 1H  
 P1 10.20 usec  
 PL1 2.00 dB  
 SFO1 399.8924689 MHz

F2 Processing parameters  
 SI 32768  
 SF 399.8900053 MHz  
 SR 5.25 Hz  
 WDW EM  
 SSB 0  
 LB 0.00 Hz  
 GB 0  
 PC 1.40

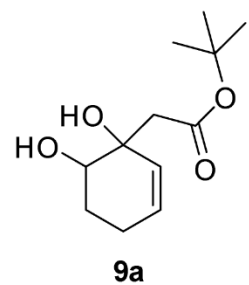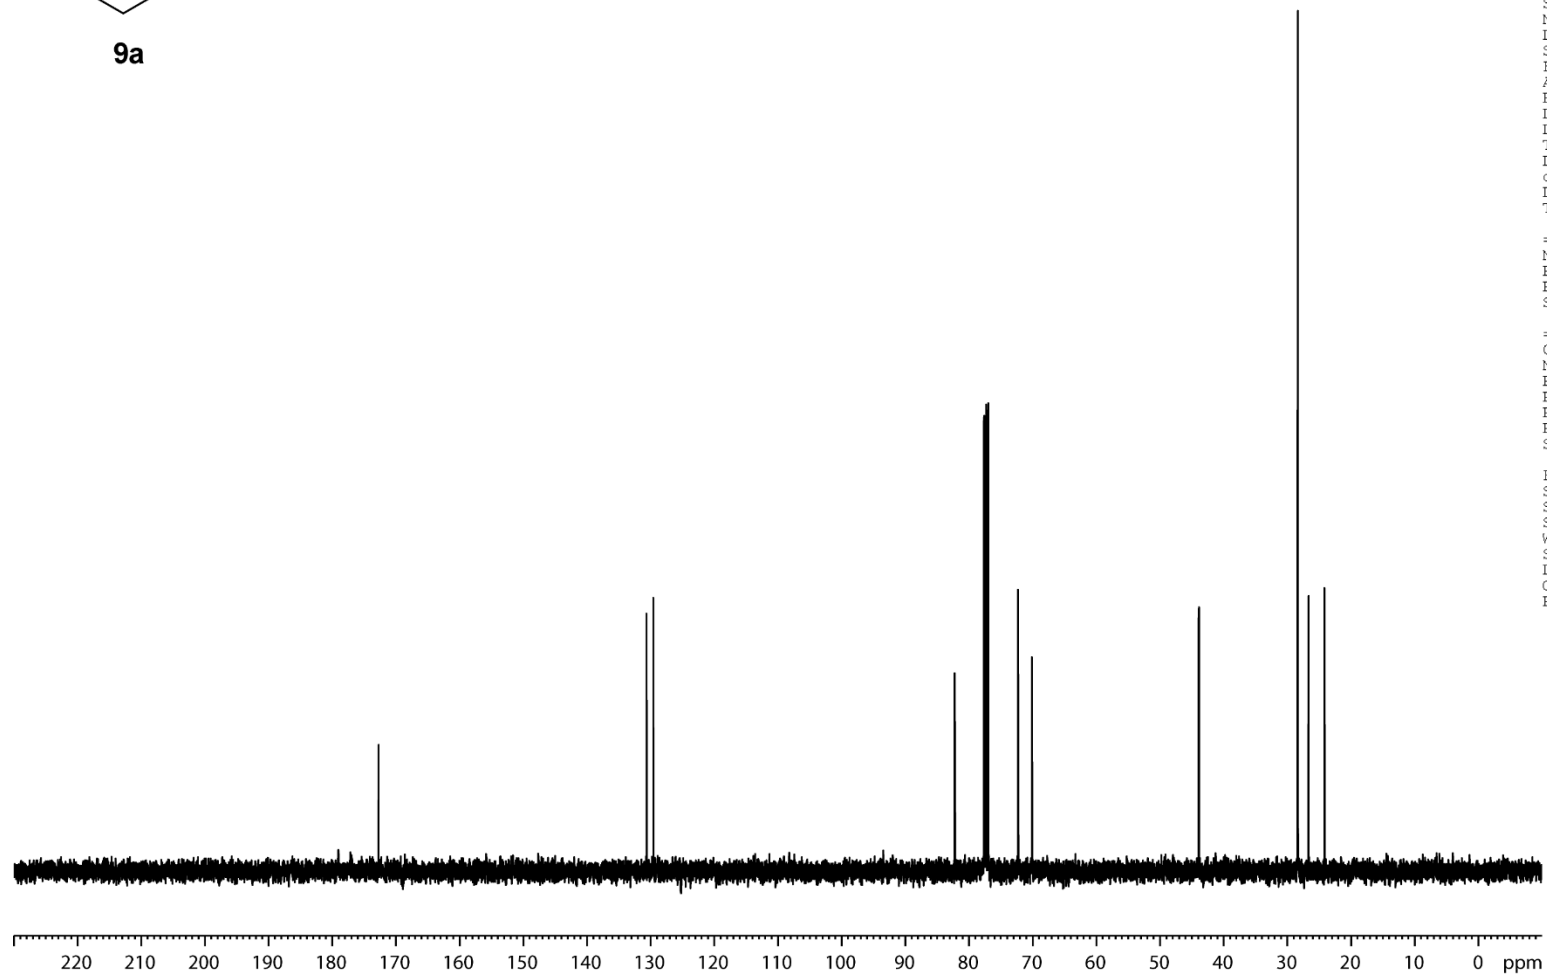

Current Data Parameters  
 NAME brn119886\_od  
 EXPNO 2  
 PROCNO 1

F2 Acquisition Parameters  
 Date\_ 20130226  
 Time 10.03  
 INSTRUM drx400  
 PROBHD 5 mm QNP 1H/13  
 PULPROG zgpg30  
 TD 131072  
 SOLVENT CDCl3  
 NS 96  
 DS 4  
 SMH 26315.789 Hz  
 FIDRES 0.200774 Hz  
 AQ 2.4904180 sec  
 RG 8192  
 DW 19.000 usec  
 DE 6.00 usec  
 TE 299.2 K  
 D1 2.00000000 sec  
 d11 0.03000000 sec  
 DELTA 1.89999998 sec  
 TD0 1

===== CHANNEL f1 =====  
 NUC1 13C  
 P1 11.00 usec  
 PL1 3.00 dB  
 SFO1 100.5635842 MHz

===== CHANNEL f2 =====  
 CPDPRG2 waltz16  
 NUC2 1H  
 PCPD2 80.00 usec  
 PL2 2.00 dB  
 PL12 16.06 dB  
 PL13 16.06 dB  
 SFO2 399.8915996 MHz

F2 Processing parameters  
 SI 65536  
 SF 100.5523935 MHz  
 SR 27.50 Hz  
 WDW EM  
 SSB 0  
 LB 1.00 Hz  
 GB 0  
 PC 1.40



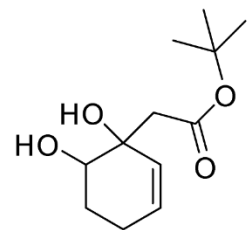

9a

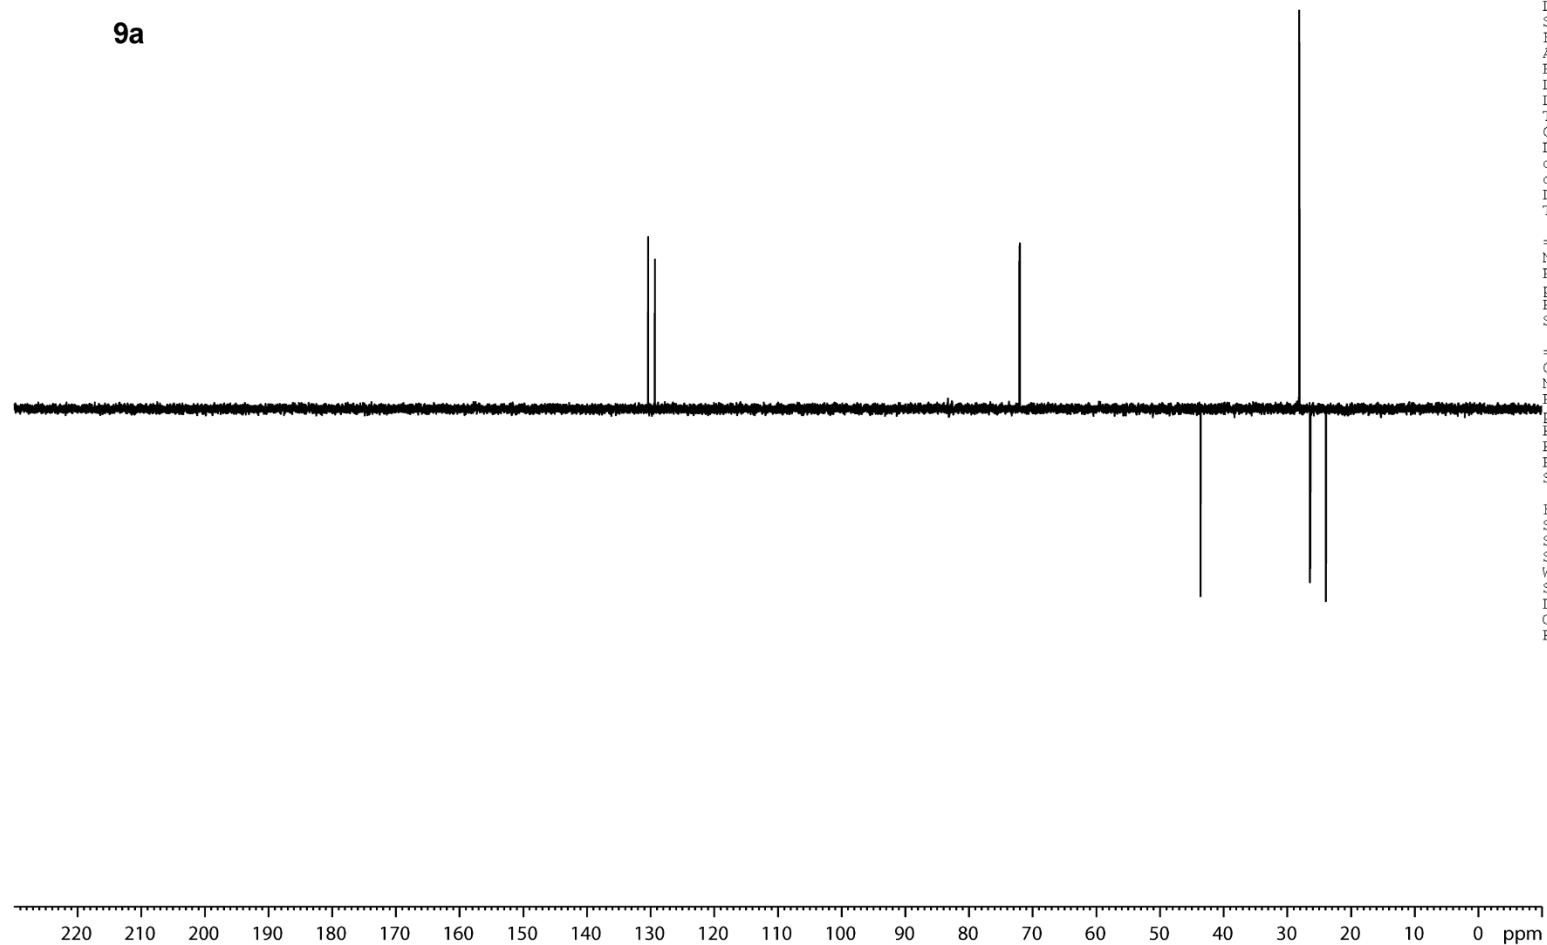

```

Current Data Parameters
NAME      brn119886_od
EXPNO    3
PROCNO   1

F2 Acquisition Parameters
Date_    20130226
Time     10.11
INSTRUM  drx400
PROBHD   5 mm QNP 1H/13
PULPROG  dept135
TD       131072
SOLVENT  CDCl3
NS       96
DS       4
SMH      26315.789 Hz
FIDRES   0.200774 Hz
AQ       2.4904180 sec
RG       8192
DW       19.000 usec
DE       7.00 usec
TE       298.2 K
CNST2    145.0000000
D1       2.00000000 sec
d2       0.00344828 sec
d12      0.00002000 sec
DELTA    0.00001401 sec
TD0      1

===== CHANNEL f1 =====
NUC1     13C
P1       11.00 usec
p2       22.00 usec
PL1      3.00 dB
SFO1     100.5635842 MHz

===== CHANNEL f2 =====
CPDPRG2  waltz16
NUC2     1H
P3       10.00 usec
p4       20.00 usec
PCPD2    80.00 usec
PL2      2.00 dB
PL12     16.06 dB
SFO2     399.8915996 MHz

F2 Processing parameters
SI       65536
SF       100.5524178 MHz
SR       3.20 Hz
WDW      EM
SSB      0
LB       1.00 Hz
GB       0
PC       1.40
  
```

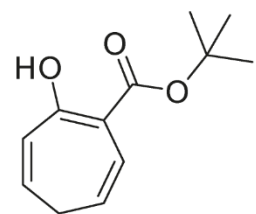

10a

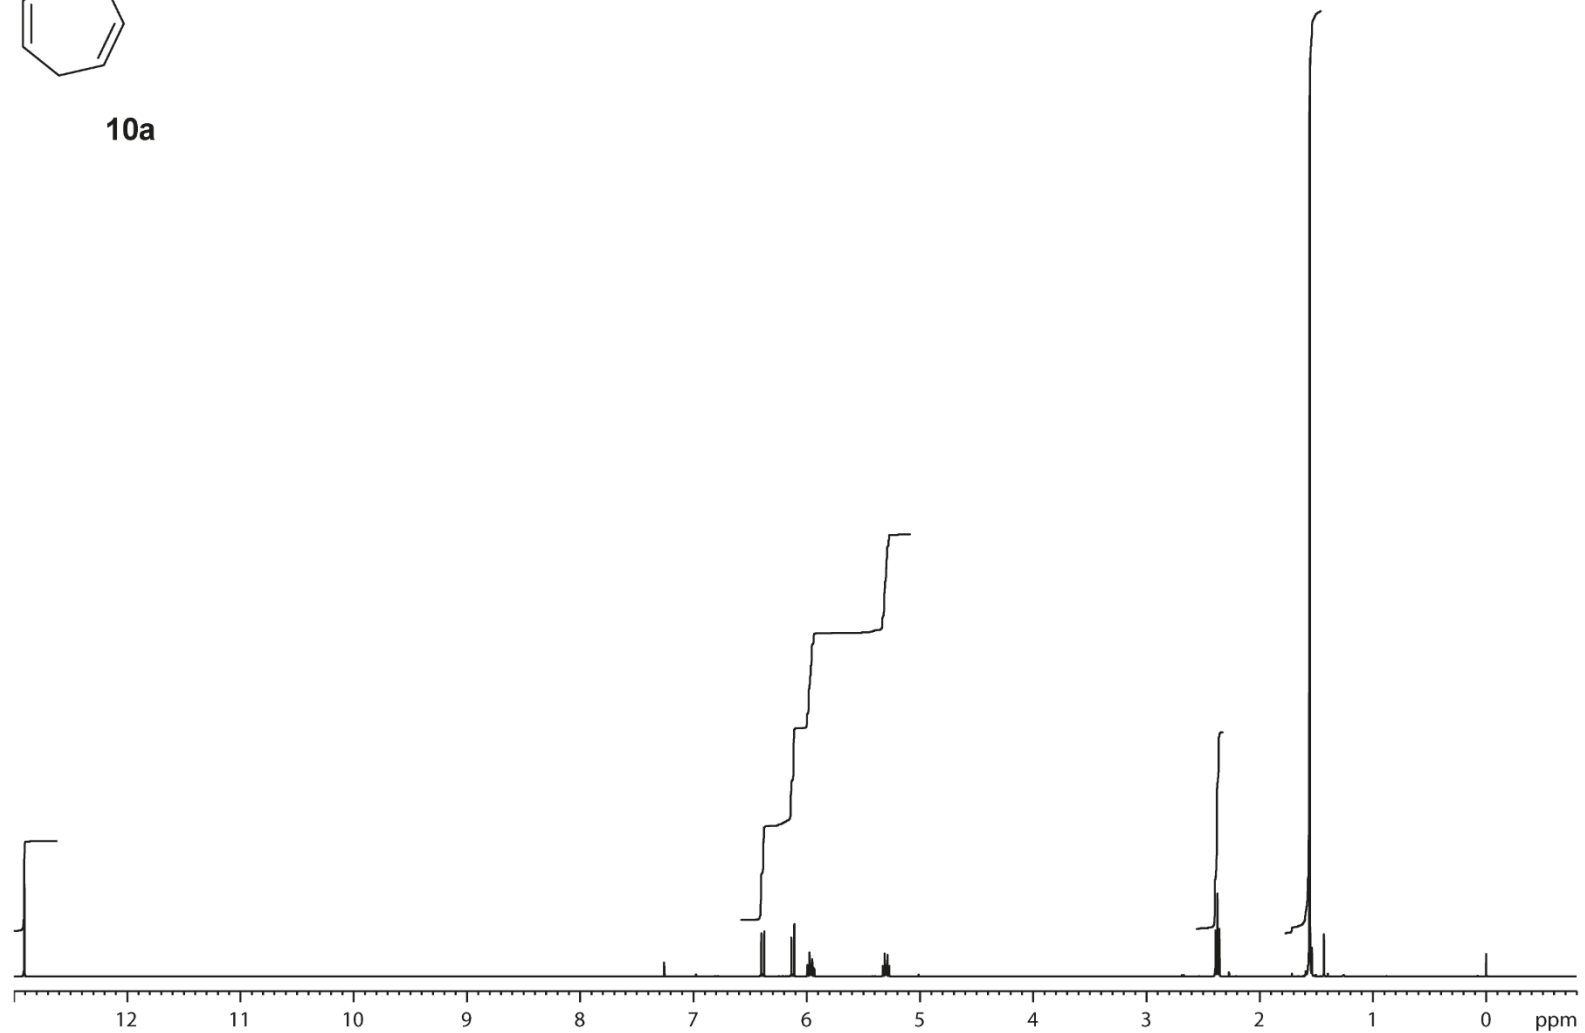

```
NAME      brn119907_od
EXPNO     1
PROCNO    1
Date_     20130227
Time      21.36
INSTRUM   AVIII400
PROBHD    5 mm PABBO BB-
PULPROG   zg30
TD         65536
SOLVENT   CDCl3
NS         64
DS         2
SWH        8223.685 Hz
FIDRES     0.125483 Hz
AQ         3.9846387 sec
RG         45.2
DW         60.800 use
DE         6.50 use
TE         296.0 K
D1         1.00000000 sec
TD0        1
```

```
===== CHANNEL f1 =====
NUC1       1H
P1         10.33 use
PL1        -4.00 dB
SFO1       400.4024726 MHz
SI         32768
SF         400.4000188 MHz
SR         18.80 Hz
WDW        EM
SSE        0
LB         0.00 Hz
GB         0
PC         1.40
F1P        13.000 ppm
F2P        -0.800 ppm
```

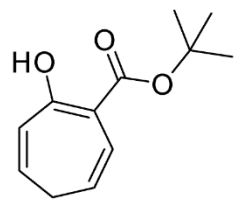

10a

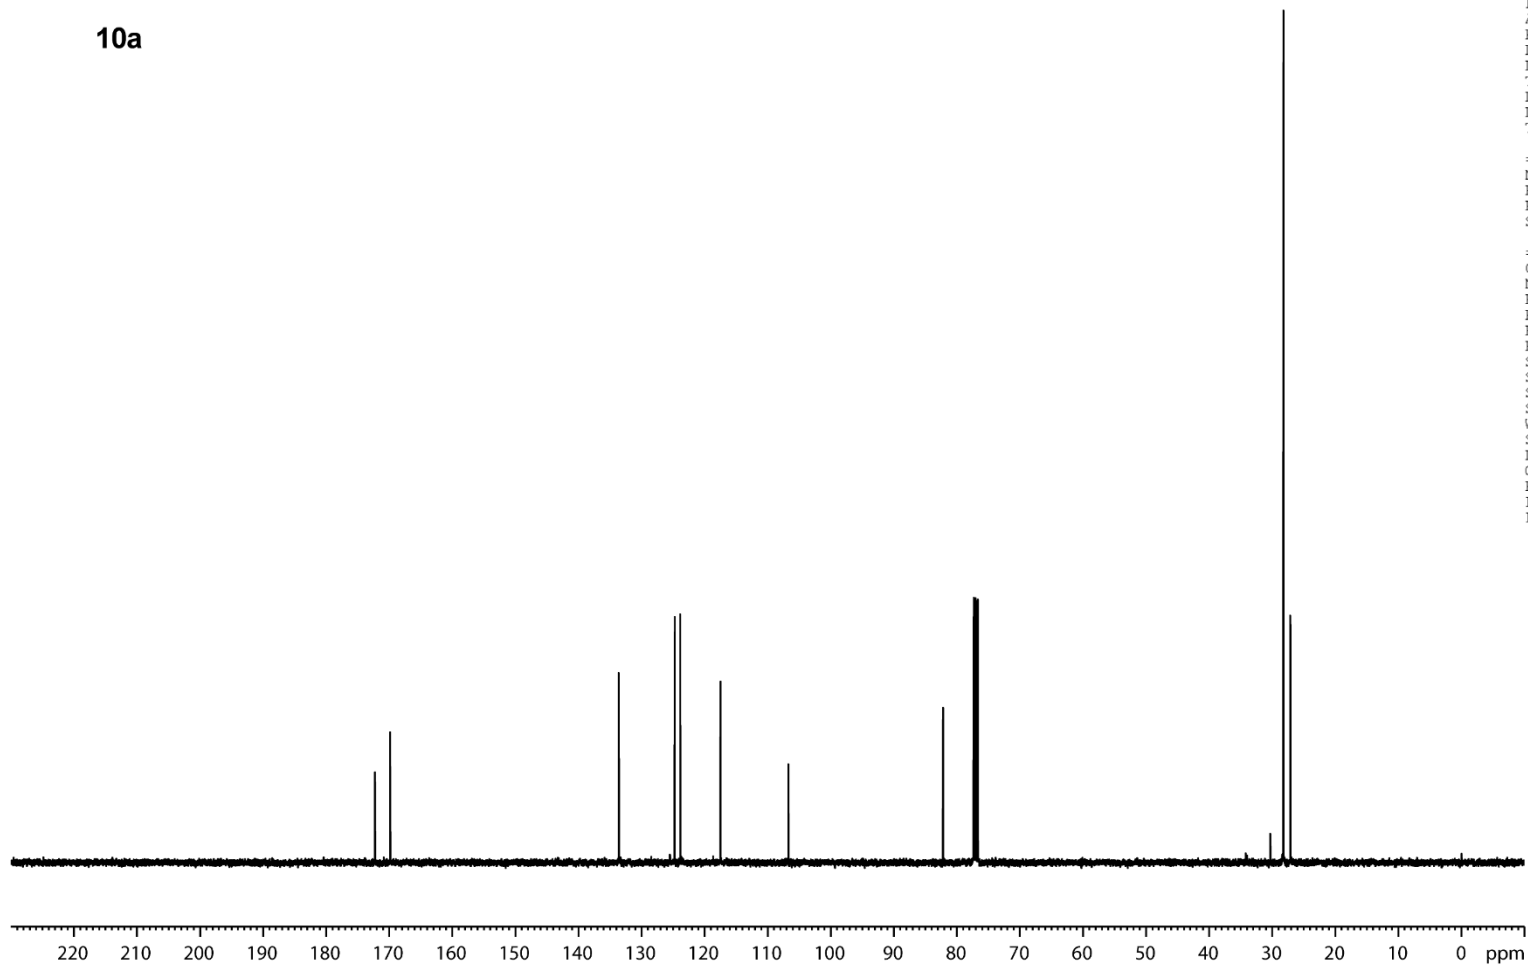

```
NAME      brn119907_od
EXPNO     2
PROCNO    1
Date_     20130227
Time      21.46
INSTRUM   AVIII400
PROBHD    5 mm PABBO BB
PULPROG   zgpg30
TD         131072
SOLVENT   CDCl3
NS         96
DS         4
SWH        26315.789 Hz
FIDRES     0.200774 Hz
AQ         2.4904180 sec
RG         71.8
DW         19.000 usec
DE         6.50 usec
TE         297.2 K
D1         2.00000000 sec
D11        0.03000000 sec
TD0        10

===== CHANNEL f1 =====
NUC1       13C
P1         8.50 usec
PL1        3.00 dB
SFO1       100.6918371 MHz

===== CHANNEL f2 =====
CPDPRG2   waltz16
NUC2       1H
PCPD2     80.00 usec
PL2        4.00 dB
PL12       13.78 dB
PL13       14.00 dB
SFO2       400.4016016 MHz
SI         65536
SF         100.6806656 MHz
SR         4.59 Hz
WDW        EM
SSB        0
LB         1.00 Hz
GB         0
PC         1.40
F1P        230.000 ppm
F2P        10.000 ppm
```



10a

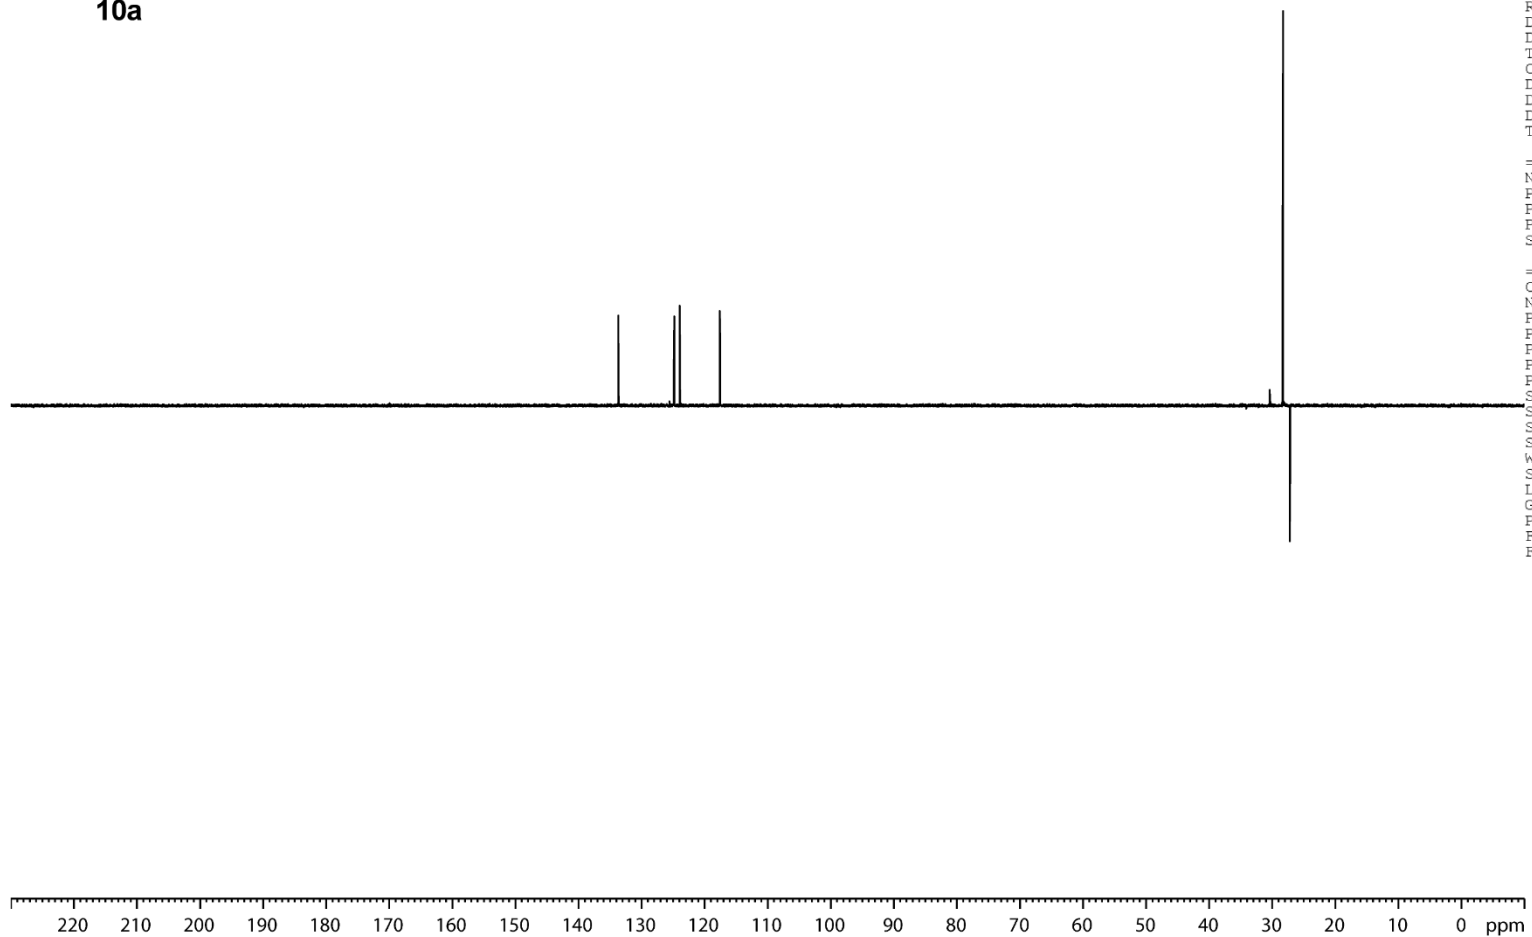

```

NAME      brn119907_od
EXPNO     3
PROCNO    1
Date_     20130227
Time      21.56
INSTRUM   AVIII400
PROBHD    5 mm PABEO BB
PULPROG   dept135
TD         131072
SOLVENT   CDCl3
NS         96
DS         4
SWH        26315.789 Hz
FIDRES     0.200774 Hz
AQ         2.4904180 sec
RG         2050
DW         19.000 usec
DE         6.50 usec
TE         296.7 K
CNST2     145.0000000
D1         2.00000000 sec
D2         0.00344828 sec
D12        0.00002000 sec
TD0        5

===== CHANNEL f1 =====
NUC1       13C
P1         8.50 usec
P2         17.00 usec
PL1        3.00 dB
SF01       100.6918371 MHz

===== CHANNEL f2 =====
CPDPRG2    waltz16
NUC2       1H
P3         10.33 usec
P4         20.66 usec
PCPD2      80.00 usec
PL2        4.00 dB
PL12       13.78 dB
SFO2       400.4016016 MHz
SI         65536
SF         100.6806578 MHz
SR         3.20 Hz
WDW        EM
SSB        0
LB         1.00 Hz
GB         0
PC         1.40
F1P        230.000 ppm
F2P        10.000 ppm

```

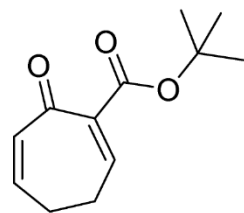

11a

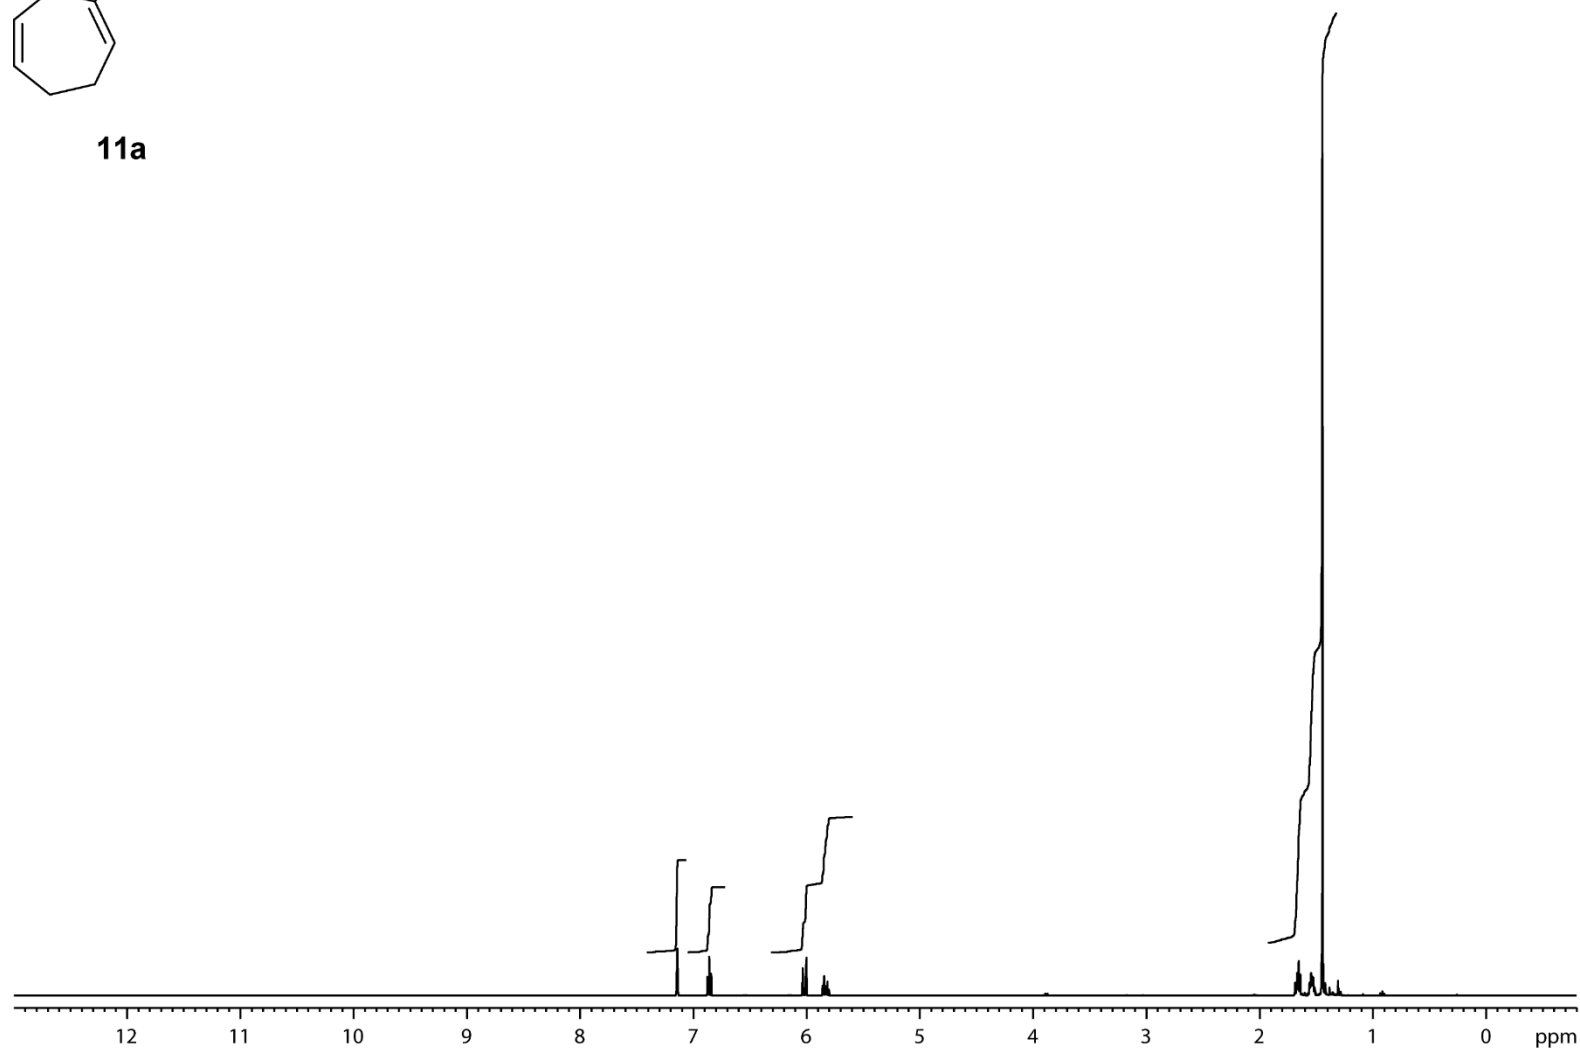

Current Data Parameters  
NAME brn121113\_od  
EXPNO 1  
PROCNO 1

F2 Acquisition Parameters  
Date\_ 20130624  
Time 11.38  
INSTRUM drx400  
PROBHD 5 mm QNP 1H/13  
PULPROG zg30  
TD 65536  
SOLVENT C6D6  
NS 64  
DS 2  
SWH 8278.146 Hz  
FIDRES 0.126314 Hz  
AQ 3.9584243 sec  
RG 50.8  
DW 60.400 use  
DE 6.00 use  
TE 299.2 K  
D1 1.0000000 sec  
TD0 1

==== CHANNEL f1 =====  
NUC1 1H  
P1 10.20 use  
PL1 2.00 dB  
SFO1 399.8724688 MHz

F2 Processing parameters  
SI 32768  
SF 399.8700000 MHz  
SR 0.00 Hz  
WDW EM  
SSB 0  
LB 0.00 Hz  
GB 0  
PC 1.40

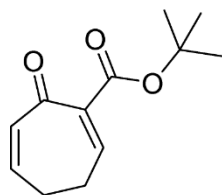

11a

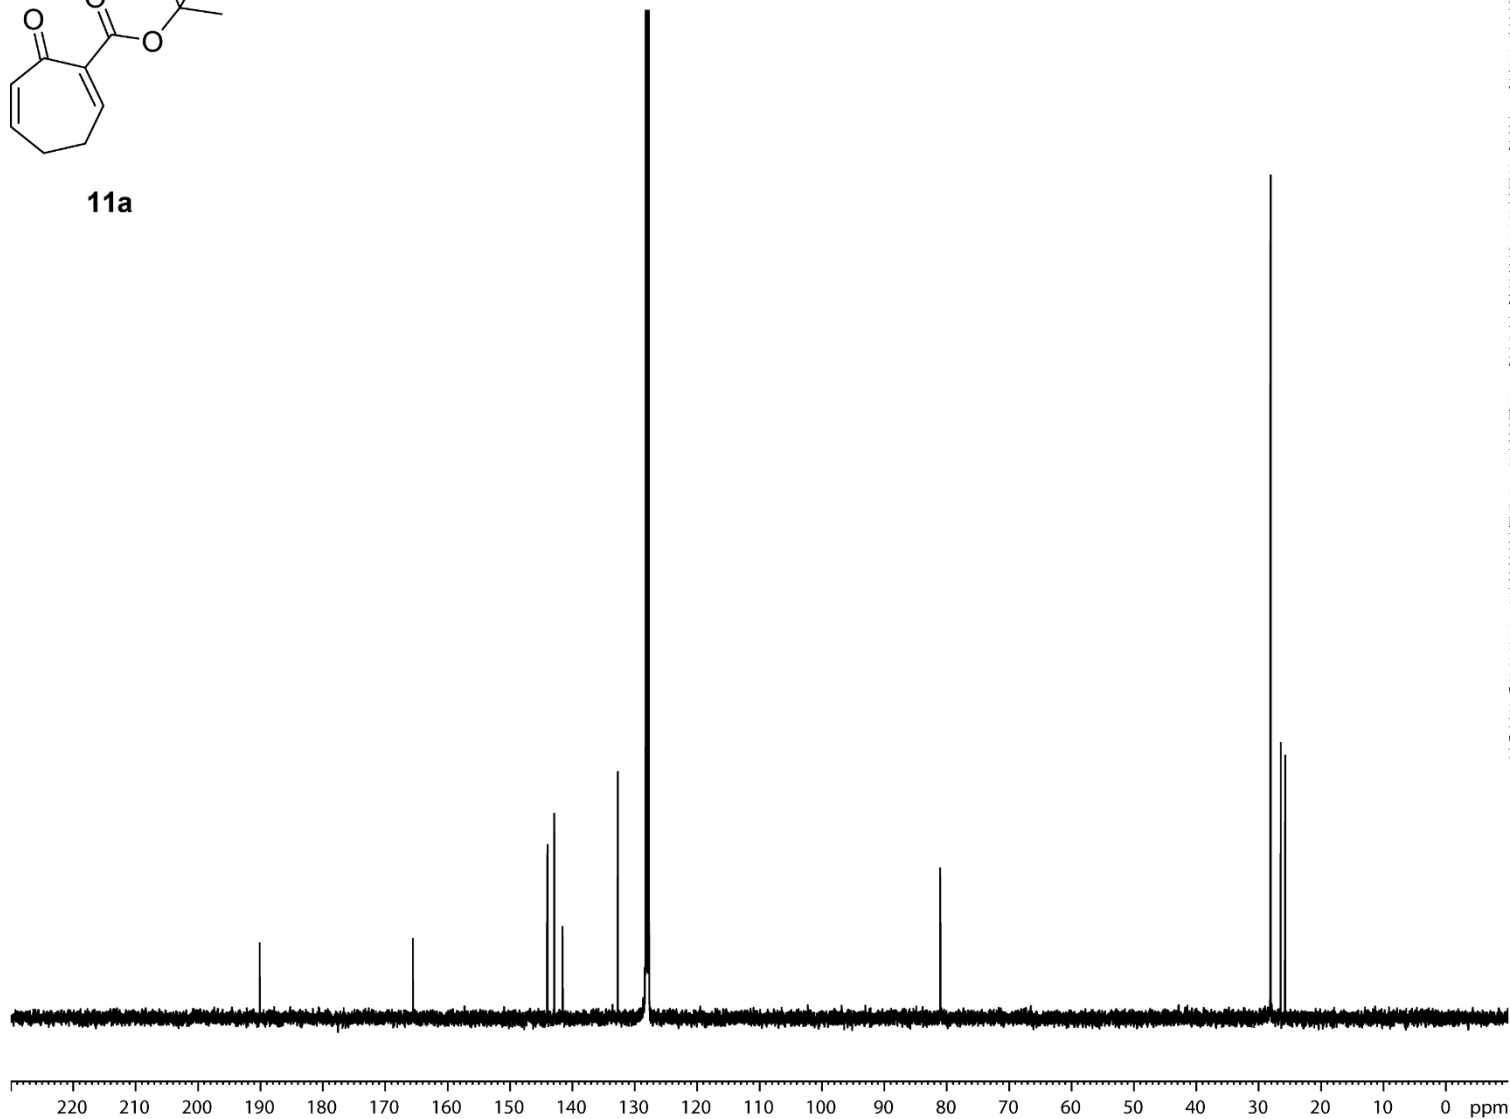

Current Data Parameters  
 NAME brn121113\_od  
 EXPNO 2  
 PROCNO 1

F2 Acquisition Parameters  
 Date\_ 20130624  
 Time 11.47  
 INSTRUM drx400  
 PROBHD 5 mm QNP 1H/13  
 PULPROG zgpg30  
 TD 131072  
 SOLVENT C6D6  
 NS 96  
 DS 4  
 SWH 26315.789 Hz  
 FIDRES 0.200774 Hz  
 AQ 2.4904180 sec  
 RG 7298.2  
 DW 19.000 usec  
 DE 6.00 usec  
 TE 299.2 K  
 D1 2.0000000 sec  
 d11 0.0300000 sec  
 DELTA 1.89999998 sec  
 TD0 1

===== CHANNEL f1 =====  
 NUC1 13C  
 P1 11.00 usec  
 PL1 3.00 dB  
 SFO1 100.5585542 MHz

===== CHANNEL f2 =====  
 CPDPRG2 waltz16  
 NUC2 1H  
 PCPD2 80.00 usec  
 PL2 2.00 dB  
 PL12 16.06 dB  
 PL13 16.06 dB  
 SFO2 399.8715995 MHz

F2 Processing parameters  
 SI 65536  
 SF 100.5473556 MHz  
 SR 36.36 Hz  
 WDW EM  
 SSB 0  
 LB 1.00 Hz  
 GB 0  
 PC 1.40

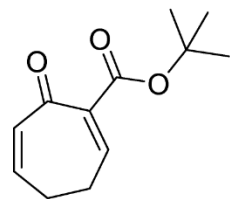

11a

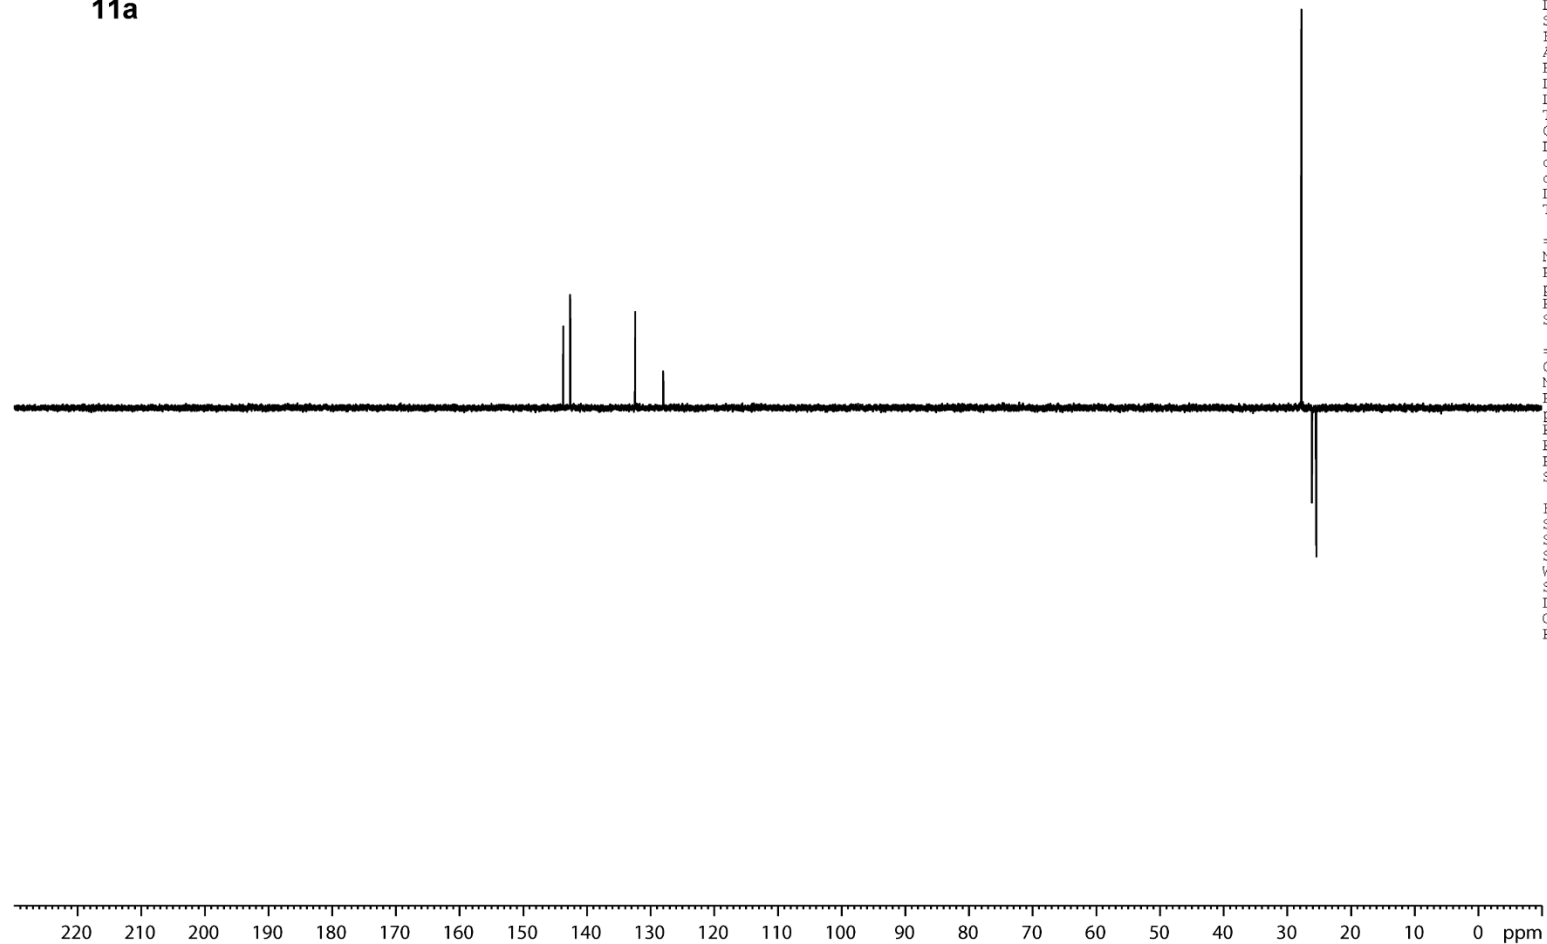

```

Current Data Parameters
NAME      brn121113_od
EXPNO    3
PROCNO   1

F2 Acquisition Parameters
Date_    20130624
Time     11.55
INSTRUM  drx400
PROBHD   5 mm QNP 1H/13
PULPROG  dept135
TD       131072
SOLVENT  C6D6
NS       96
DS       4
SMH      26315.789 Hz
FIDRES   0.200774 Hz
AQ       2.4904180 sec
RG       9195.2
DW       19.000 usec
DE       7.00 usec
TE       299.2 K
CNST2    145.0000000
D1       2.00000000 sec
d2       0.00344828 sec
d12      0.00002000 sec
DELTA    0.00001401 sec
TD0      1

===== CHANNEL f1 =====
NUC1     13C
P1       11.00 usec
p2       22.00 usec
PL1      3.00 dB
SFO1     100.5585542 MHz

===== CHANNEL f2 =====
CPDPRG2  waltz16
NUC2     1H
P3       10.00 usec
p4       20.00 usec
PCPD2    80.00 usec
PL2      2.00 dB
PL12     16.06 dB
SFO2     399.8715995 MHz

F2 Processing parameters
SI       65536
SF       100.5473849 MHz
SR       7.09 Hz
WDW      EM
SSB      0
LB       1.00 Hz
GB       0
PC       1.40

```

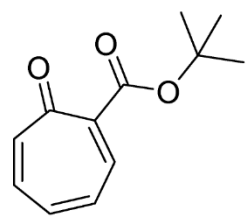

12a

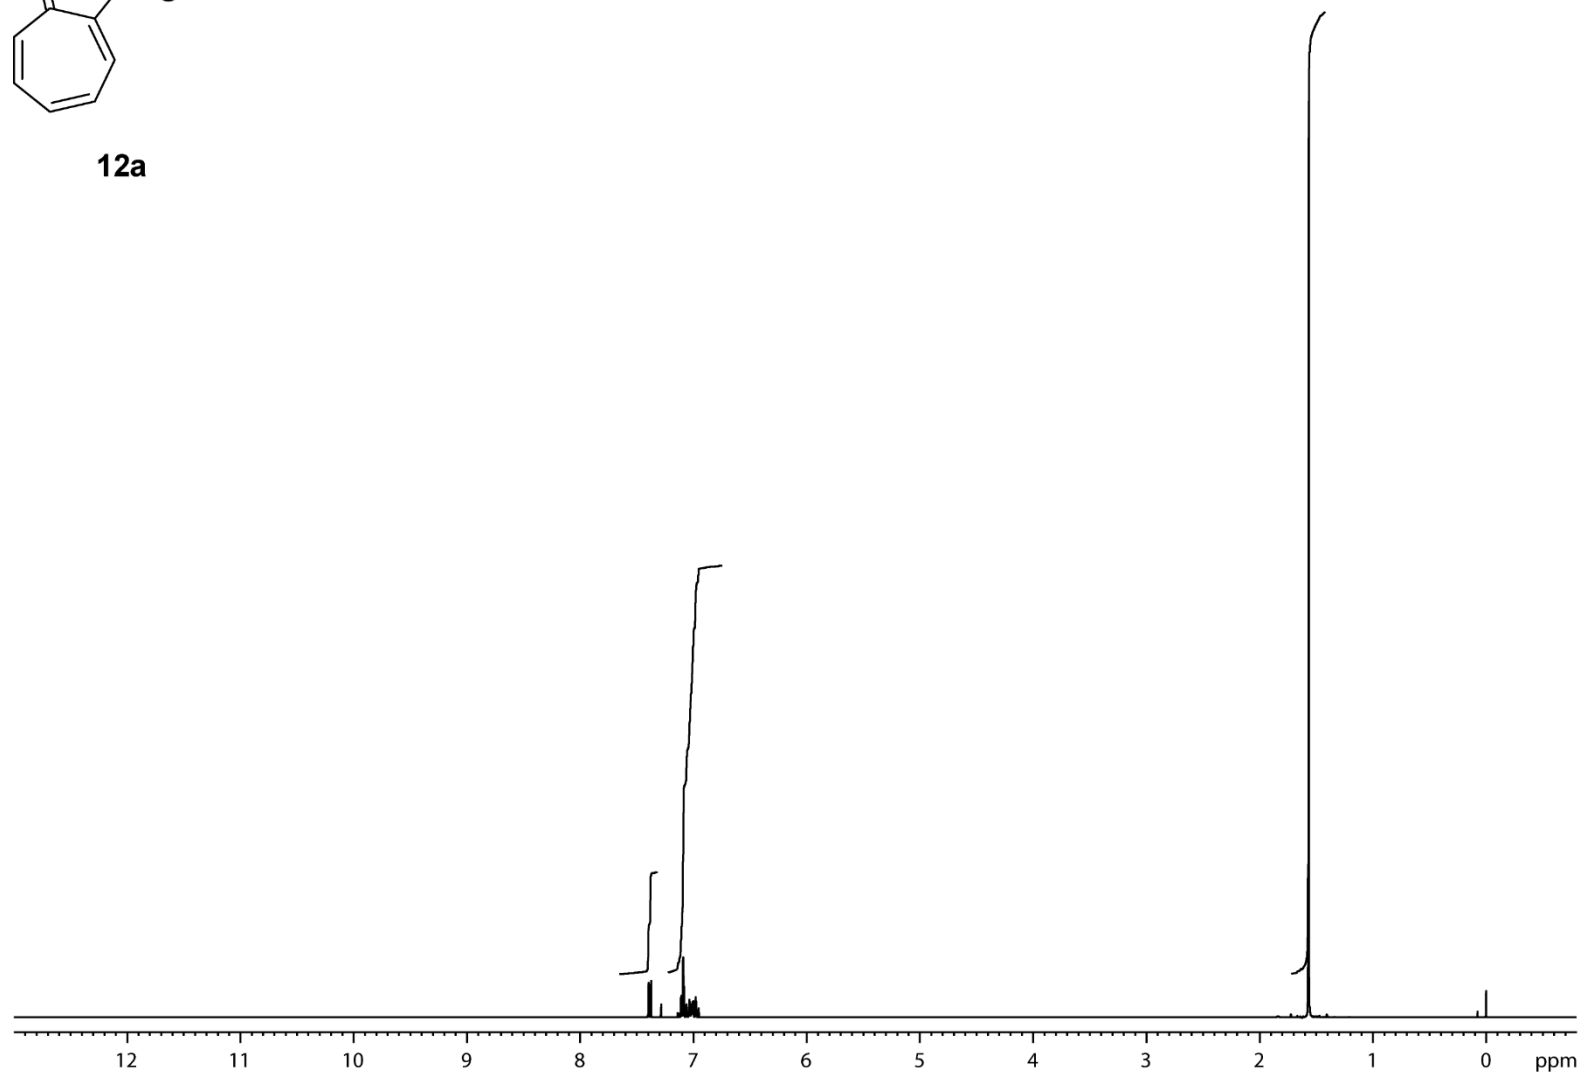

Current Data Parameters  
NAME brn119952\_od  
EXPNO 1  
PROCNO 1

F2 Acquisition Parameters  
Date\_ 20130301  
Time 10.31  
INSTRUM drx400  
PROBHD 5 mm QNP 1H/13  
PULPROG zg30  
TD 65536  
SOLVENT CDCl3  
NS 64  
DS 2  
SWH 8278.146 Hz  
FIDRES 0.126314 Hz  
AQ 3.9584243 sec  
RG 71.8  
DW 60.400 usec  
DE 6.00 usec  
TE 298.2 K  
D1 1.00000000 sec  
TD0 1

===== CHANNEL f1 =====  
NUC1 1H  
P1 10.20 usec  
PL1 2.00 dB  
SFO1 399.8924689 MHz

F2 Processing parameters  
SI 32768  
SF 399.8900033 MHz  
SR 3.33 Hz  
WDW EM  
SSB 0  
LB 0.00 Hz  
GB 0  
PC 1.40



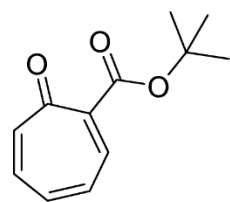

12a

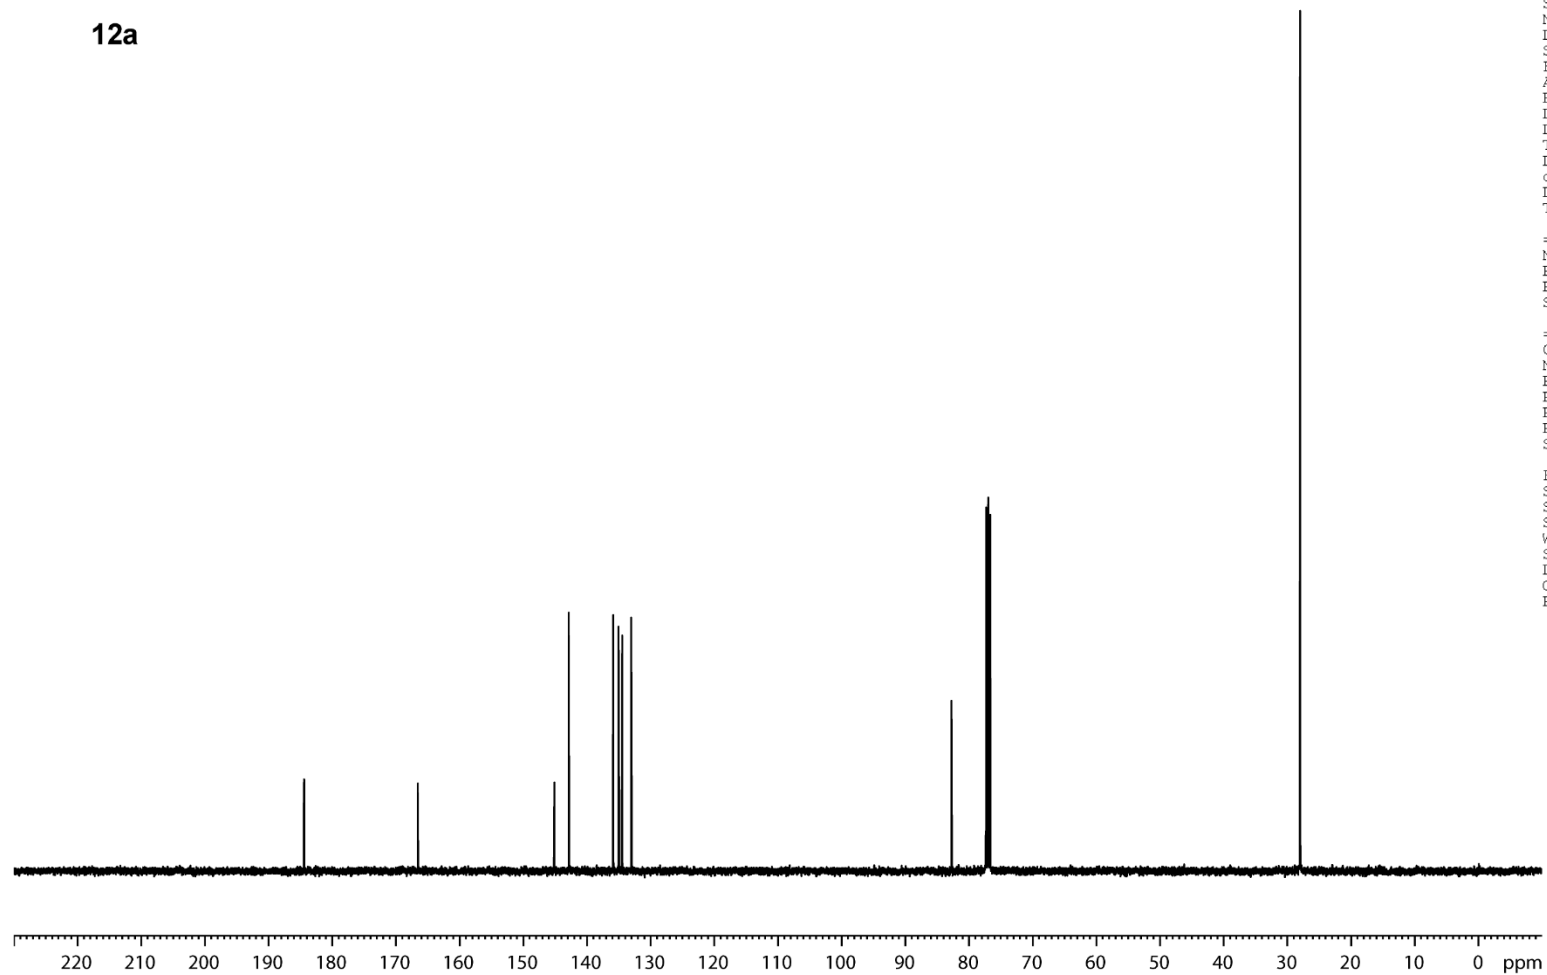

```
Current Data Parameters
NAME      brn119952_od
EXPNO     2
PROCNO    1

F2 Acquisition Parameters
Date_     20130301
Time      11.11
INSTRUM   drx400
PROBHD    5 mm QNP 1H/13
PULPROG   zgpg30
TD         131072
SOLVENT   CDCl3
NS         512
DS         4
SMH        26315.789 Hz
FIDRES     0.200774 Hz
AQ         2.4904180 sec
RG         10321.3
DW         19.000 usec
DE         6.00 usec
TE         299.2 K
D1         2.00000000 sec
d11        0.03000000 sec
DELTA     1.89999998 sec
TD0        1

===== CHANNEL f1 =====
NUC1       13C
P1         11.00 usec
PL1        3.00 dB
SFO1       100.5635842 MHz

===== CHANNEL f2 =====
CPDPRG2   waltz16
NUC2       1H
PCPD2     80.00 usec
PL2        2.00 dB
PL12       16.06 dB
PL13       16.06 dB
SFO2       399.8915996 MHz

F2 Processing parameters
SI         65536
SF         100.5524276 MHz
SR         6.61 Hz
WDW        EM
SSB         0
LB         1.00 Hz
GB         0
PC         1.40
```



12a

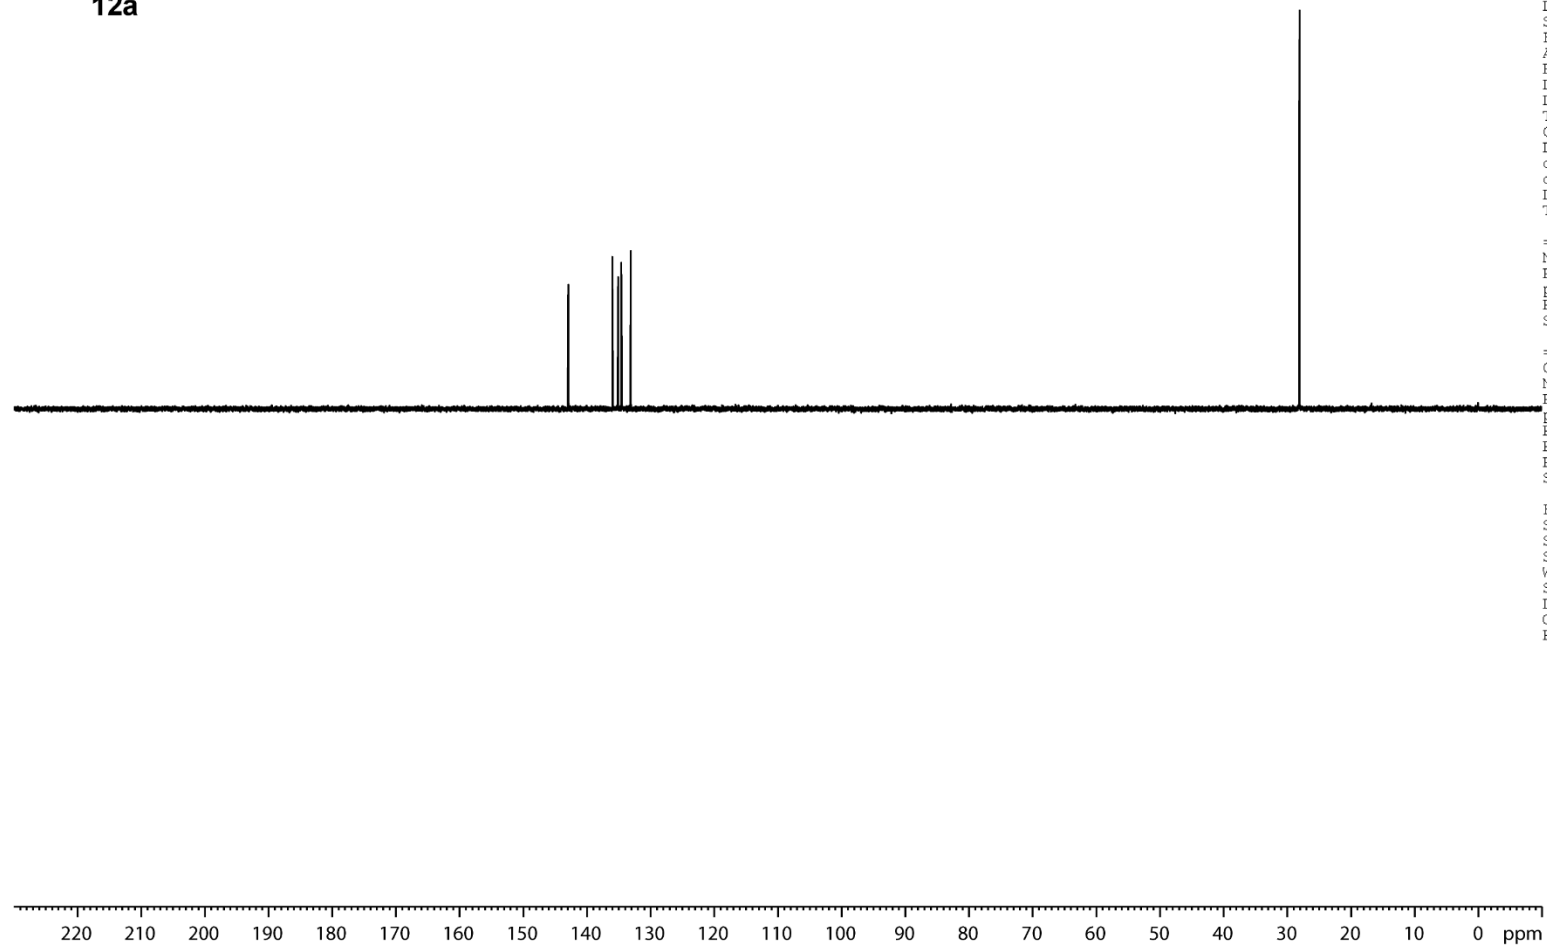

```

Current Data Parameters
NAME      brn119952_od
EXPNO     3
PROCNO    1

F2 Acquisition Parameters
Date_     20130301
Time      11.31
INSTRUM   drx400
PROBHD    5 mm QNP 1H/13
PULPROG   dept135
TD         131072
SOLVENT   CDCl3
NS         256
DS         4
SMH        26315.789 Hz
FIDRES     0.200774 Hz
AQ         2.4904180 sec
RG         7298.2
DW         19.000 usec
DE         7.00 usec
TE         299.2 K
CNST2     145.0000000
D1         2.00000000 sec
d2         0.00344828 sec
d12        0.00002000 sec
DELTA     0.00001401 sec
TD0        1

===== CHANNEL f1 =====
NUC1       13C
P1         11.00 usec
P2         22.00 usec
PL1        3.00 dB
SFO1       100.5635842 MHz

===== CHANNEL f2 =====
CPDPRG2    waltz16
NUC2        1H
P3         10.00 usec
P4         20.00 usec
PCPD2      80.00 usec
PL2        2.00 dB
PL12       16.06 dB
SFO2       399.8915996 MHz

F2 Processing parameters
SI         65536
SF         100.5524178 MHz
SR         3.20 Hz
WDW        EM
SSB        0
LB         1.00 Hz
GB         0
PC         1.40

```

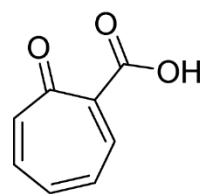

13

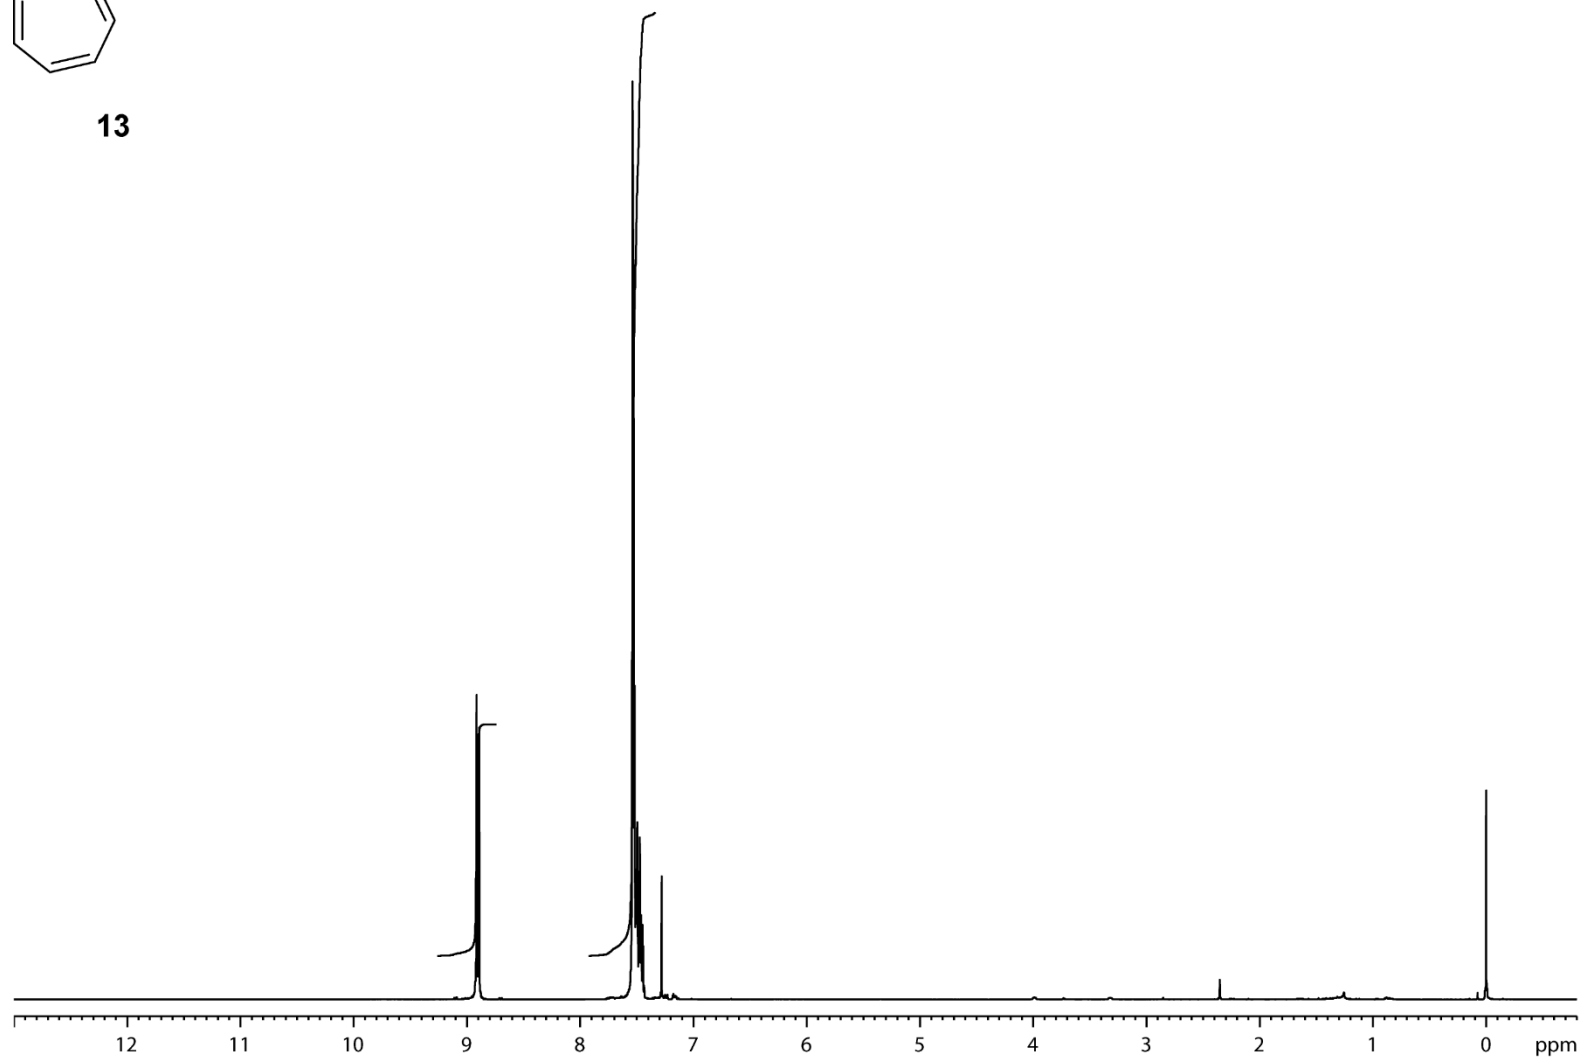

Current Data Parameters  
NAME brn119979\_od  
EXPNO 1  
PROCNO 1

F2 - Acquisition Parameters  
Date\_ 20130304  
Time 14.38  
INSTRUM drx400  
PROBHD 5 mm QNP 1H/13  
PULPROG zg30  
TD 65536  
SOLVENT CDCl3  
NS 64  
DS 2  
SWH 8278.146 Hz  
FIDRES 0.126314 Hz  
AQ 3.9584243 sec  
RG 181  
DW 60.400 usec  
DE 6.00 usec  
TE 299.2 K  
D1 1.00000000 sec  
TDO 1

==== CHANNEL f1 =====  
NUC1 1H  
P1 10.20 usec  
PL1 -2.00 dB  
SFO1 399.8924689 MHz

F2 - Processing parameters  
SI 32768  
SF 399.8900044 MHz  
SR 4.41 Hz  
WDW EM  
SSB 0  
LB 0.00 Hz  
GB 0  
PC 1.40

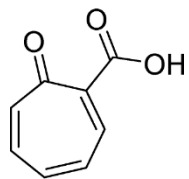

13

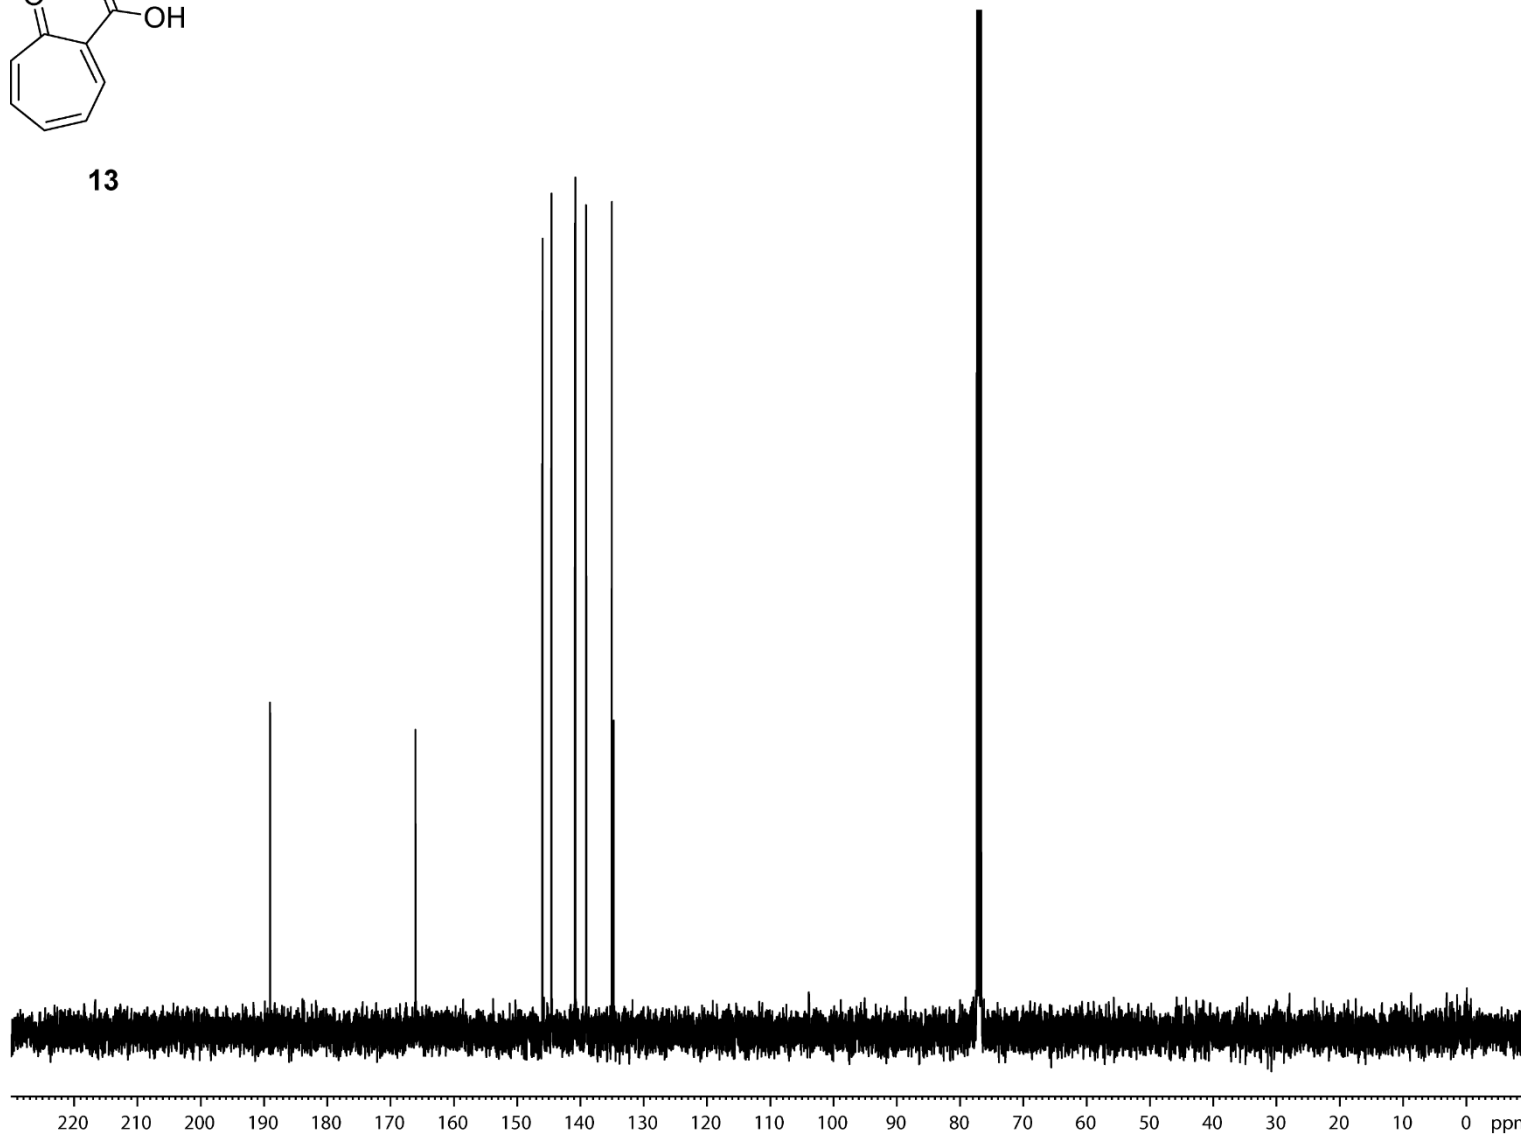

```
Current Data Parameters
NAME      brn119979_od
EXPNO     2
PROCNO    1

F2 Acquisition Parameters
Date_     20130304
Time      14.46
INSTRUM   drx400
PROBHD    5 mm QNP 1H/13
PULPROG   zgpg30
TD         131072
SOLVENT   CDCl3
NS         384
DS         4
SWH        26315.789 Hz
FIDRES     0.200774 Hz
AQ         2.4904180 sec
RG         10321.3
DW         19.000 use
DE         6.00 use
TE         299.2 K
D1         2.0000000 sec
d11        0.0300000 sec
DELTA     1.89999998 sec
TD0        1

===== CHANNEL f1 =====
NUC1       13C
P1         11.00 use
PL1        3.00 dB
SFO1       100.5635842 MHz

===== CHANNEL f2 =====
CPDPRG2    waltz16
NUC2        1H
PCPD2       80.00 use
PL2         2.00 dB
PL12        16.06 dB
PL13        16.06 dB
SFO2       399.8915996 MHz

F2 Processing parameters
SI          65536
SF          100.5524273 MHz
SR           6.35 Hz
WDW          EM
SSB          0
LB           1.00 Hz
GB           0
PC           1.40
```

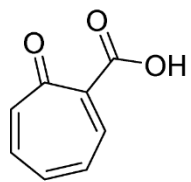

13

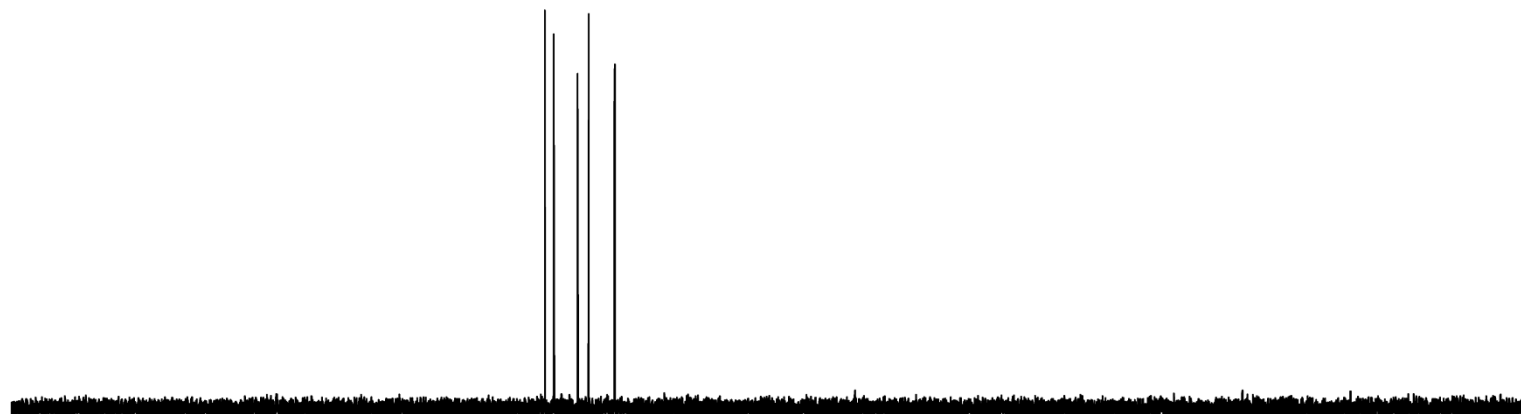

```

Current Data Parameters
NAME      brn119979_od
EXPNO     3
PROCNO    1

F2 Acquisition Parameters
Date_     20130304
Time      15.18
INSTRUM   drx400
PROBHD    5 mm QNP 1H/13
PULPROG   dept135
TD         131072
SOLVENT   CDCl3
NS         288
DS         4
SWH        26315.789 Hz
FIDRES     0.200774 Hz
AQ         2.4904180 sec
RG         8192
DW         19.000 usec
DE         7.00 usec
TE         299.2 K
CNST2     145.0000000
D1         2.00000000 sec
d2         0.00344828 sec
d12        0.00002000 sec
DELTA     0.00001401 sec
TD0        1

===== CHANNEL f1 =====
NUC1       13C
P1         11.00 usec
p2         22.00 usec
PL1        3.00 dB
SFO1       100.5635842 MHz

===== CHANNEL f2 =====
CPDPRG2    waltz16
NUC2       1H
P3         10.00 usec
p4         20.00 usec
PCPD2      80.00 usec
PL2        2.00 dB
PL12       16.06 dB
SFO2       399.8915996 MHz

F2 Processing parameters
SI         65536
SF         100.5524178 MHz
SR         3.20 Hz
WDW        EM
SSB        0
LB         1.00 Hz
GB         0
PC         1.40
  
```

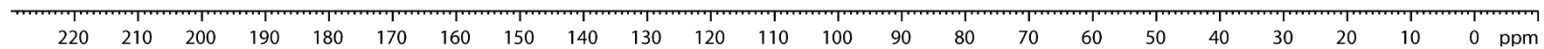

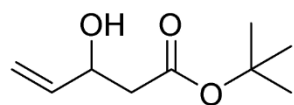

16

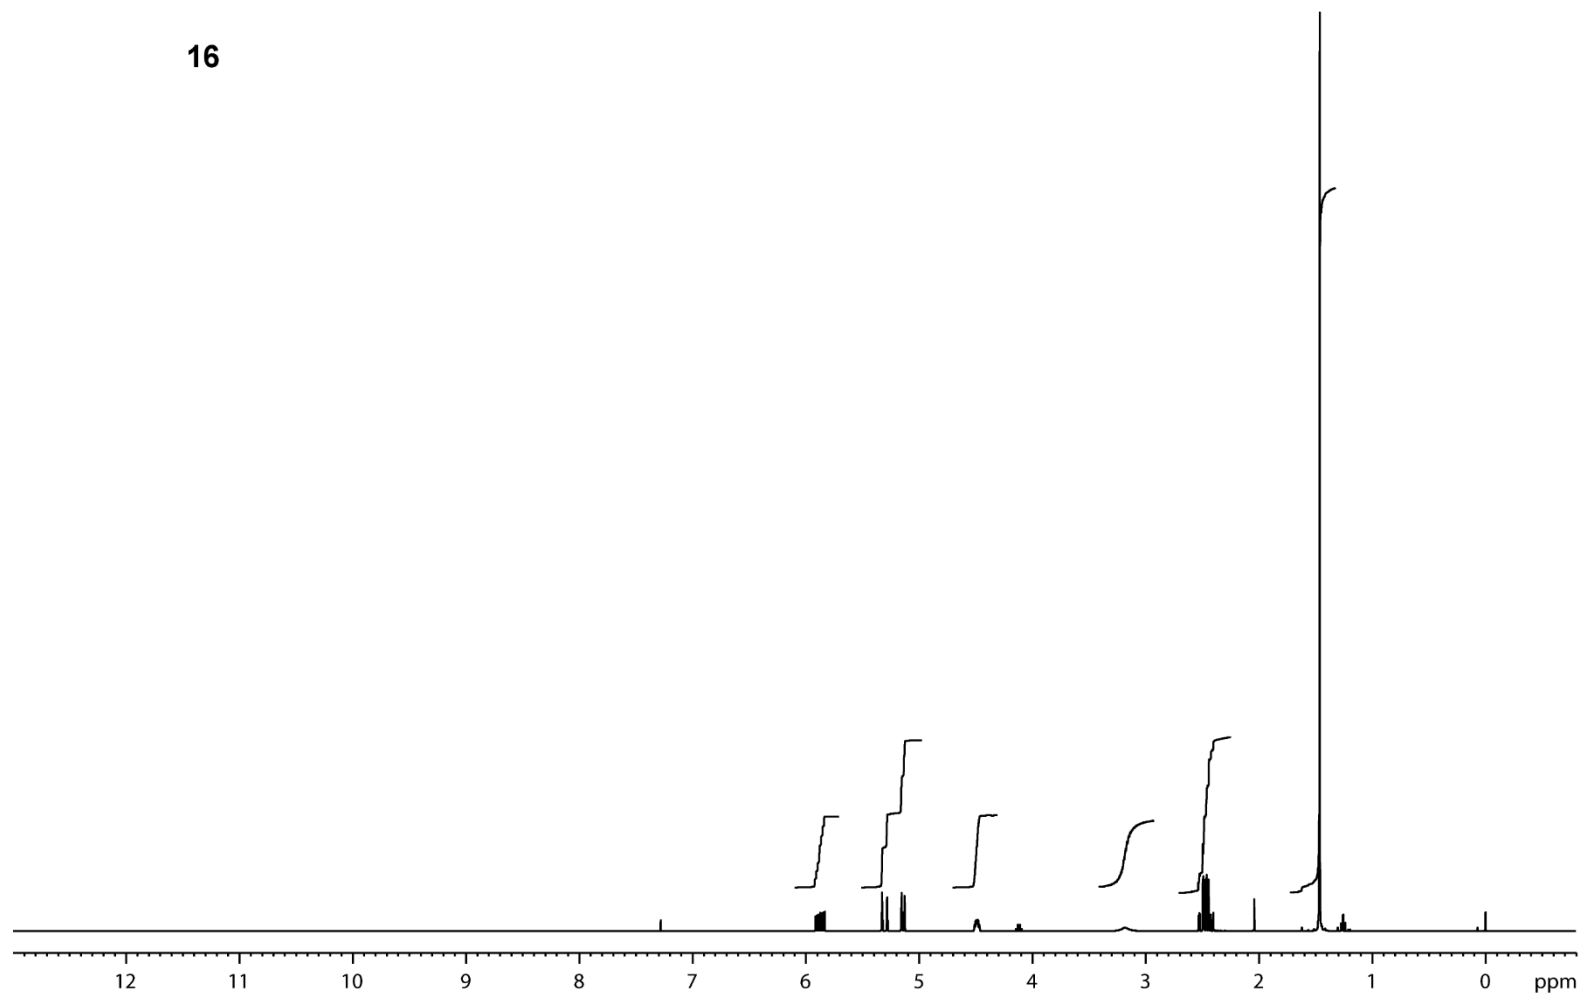

Current Data Parameters  
 NAME rap120781\_od  
 EXPNO 1  
 PROCNO 1

F2 Acquisition Parameters  
 Date\_ 20130516  
 Time 10.46  
 INSTRUM drx400  
 PROBHD 5 mm QNP 1H/13  
 PULPROG zg30  
 TD 65536  
 SOLVENT CDCl3  
 NS 64  
 DS 2  
 SWH 8278.146 Hz  
 FIDRES 0.126314 Hz  
 AQ 3.9584243 sec  
 RG 50.8  
 DW 60.400 usec  
 DE 6.00 usec  
 TE 299.2 K  
 D1 1.00000000 sec  
 TD0 1

==== CHANNEL f1 =====  
 NUC1 1H  
 P1 10.20 usec  
 PL1 2.00 dB  
 SFO1 399.8924689 MHz

F2 Processing parameters  
 SI 32768  
 SF 399.8900044 MHz  
 SR 4.38 Hz  
 WDW EM  
 SSB 0  
 LB 0.00 Hz  
 GB 0  
 PC 1.40

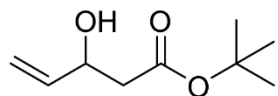

16

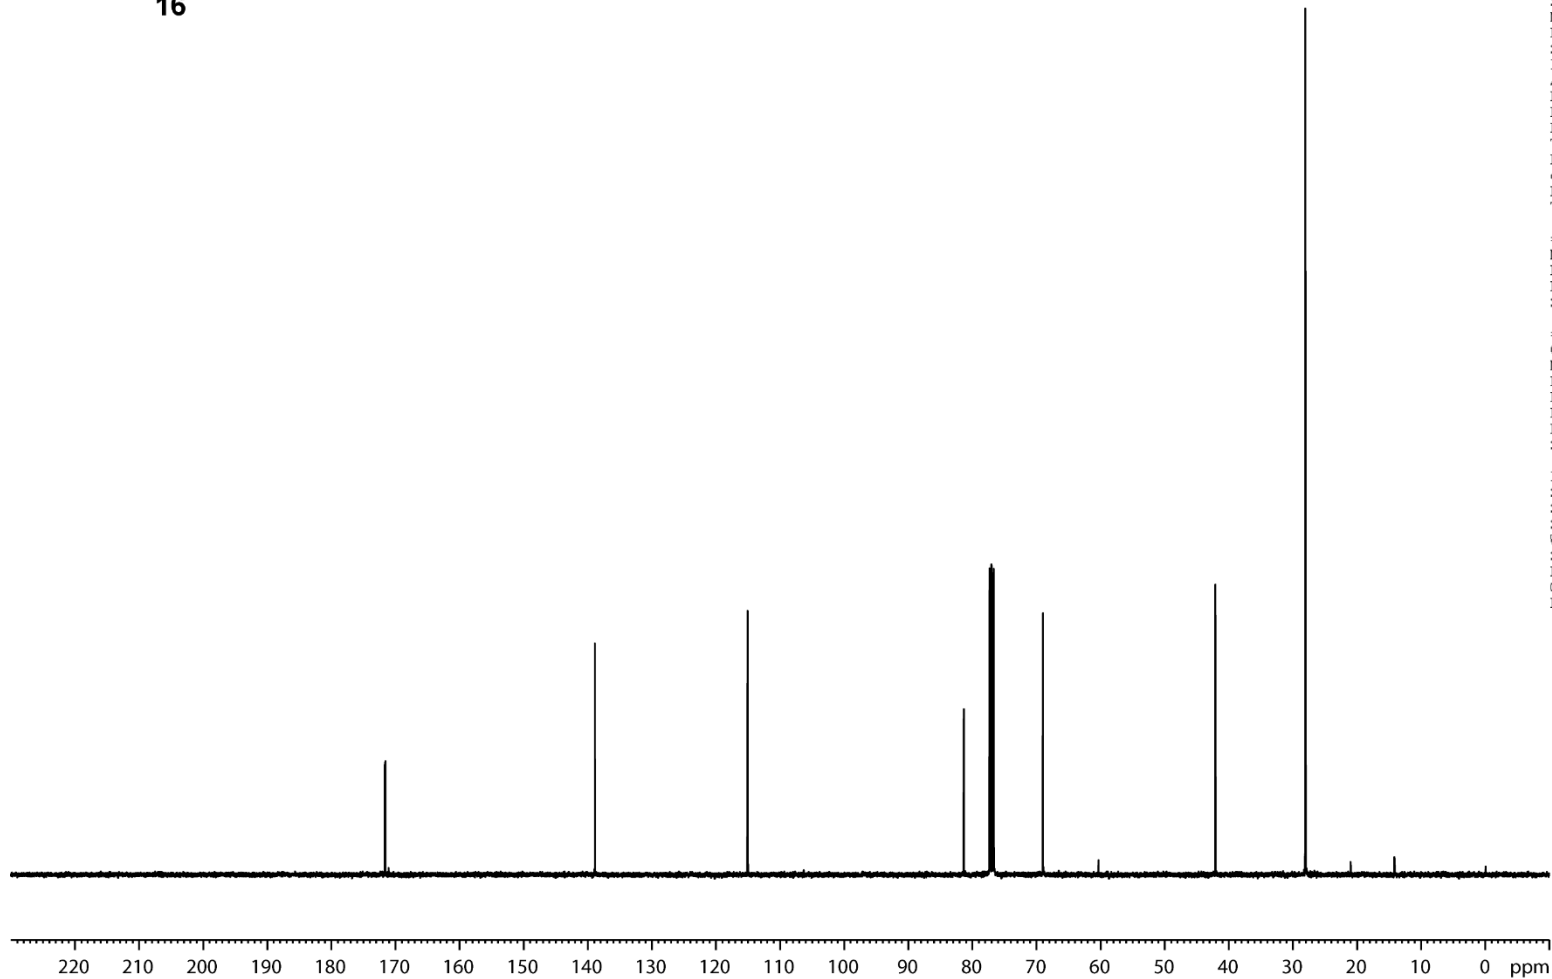

Current Data Parameters  
 NAME rap120781\_od  
 EXPNO 2  
 PROCNO 1

F2 Acquisition Parameters  
 Date\_ 20130516  
 Time 12.05  
 INSTRUM drx400  
 PROBHD 5 mm QNP 1H/13  
 PULPROG zgpg30  
 TD 131072  
 SOLVENT CDCl3  
 NS 1024  
 DS 4  
 SWH 26315.789 Hz  
 FIDRES 0.200774 Hz  
 AQ 2.4904180 sec  
 RG 9195.2  
 DW 19.000 usec  
 DE 6.00 usec  
 TE 300.2 K  
 D1 2.00000000 sec  
 d11 0.03000000 sec  
 DELTA 1.89999998 sec  
 TDO 1

===== CHANNEL f1 =====  
 NUC1 13C  
 P1 11.00 usec  
 PL1 3.00 dB  
 SFO1 100.5635842 MHz

===== CHANNEL f2 =====  
 CPDPRG2 waltz16  
 NUC2 1H  
 PCD2 80.00 usec  
 PL2 2.00 dB  
 PL12 16.06 dB  
 PL13 16.06 dB  
 SFO2 399.8915996 MHz

F2 Processing parameters  
 SI 65536  
 SF 100.5524246 MHz  
 SR 3.62 Hz  
 WDN EM  
 SSB 0  
 LB 1.00 Hz  
 GB 0  
 PC 1.40

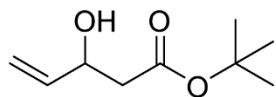

16

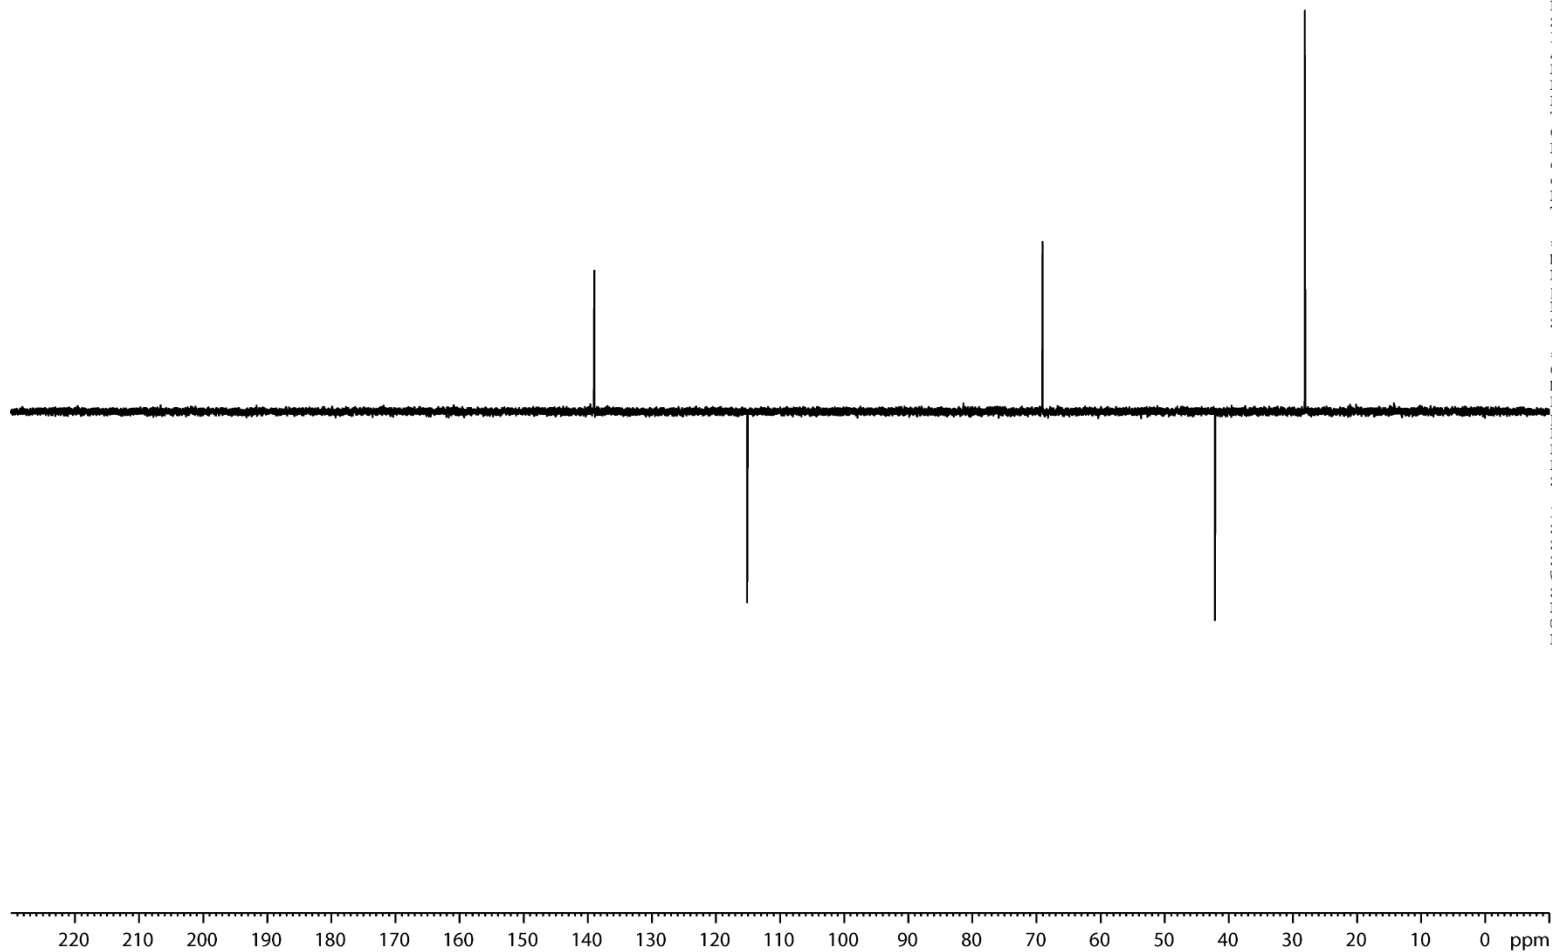

Current Data Parameters  
 NAME rap120781\_od  
 EXPNO 3  
 PROCNO 1

F2 Acquisition Parameters  
 Date\_ 20130516  
 Time 12.14  
 INSTRUM drx400  
 PROBHD 5 mm QNP 1H/13  
 PULPROG dept135  
 TD 131072  
 SOLVENT CDCl3  
 NS 96  
 DS 4  
 SWH 26315.789 Hz  
 FIDRES 0.200774 Hz  
 AQ 2.4904180 sec  
 RG 9195.2  
 DW 19.000 usec  
 DE 7.00 usec  
 TE 300.2 K  
 CNST2 145.0000000  
 D1 2.0000000 sec  
 d2 0.00344828 sec  
 d12 0.00002000 sec  
 DELTA 0.00001401 sec  
 TDO 1

===== CHANNEL f1 =====  
 NUC1 13C  
 P1 11.00 usec  
 p2 23.00 usec  
 PL1 3.00 dB  
 SFO1 100.5635842 MHz

===== CHANNEL f2 =====  
 CPDPRG2 waltz16  
 NUC2 1H  
 P3 10.00 usec  
 p4 20.00 usec  
 PCPD2 80.00 usec  
 PL2 2.00 dB  
 PL12 16.06 dB  
 SFO2 399.8915996 MHz

F2 Processing parameters  
 SI 65536  
 SF 100.5524178 MHz  
 SR 3.20 Hz  
 WDN EM  
 SSB 0  
 LB 1.00 Hz  
 GB 0  
 PC 1.40



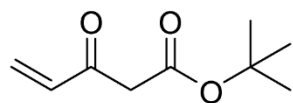

17

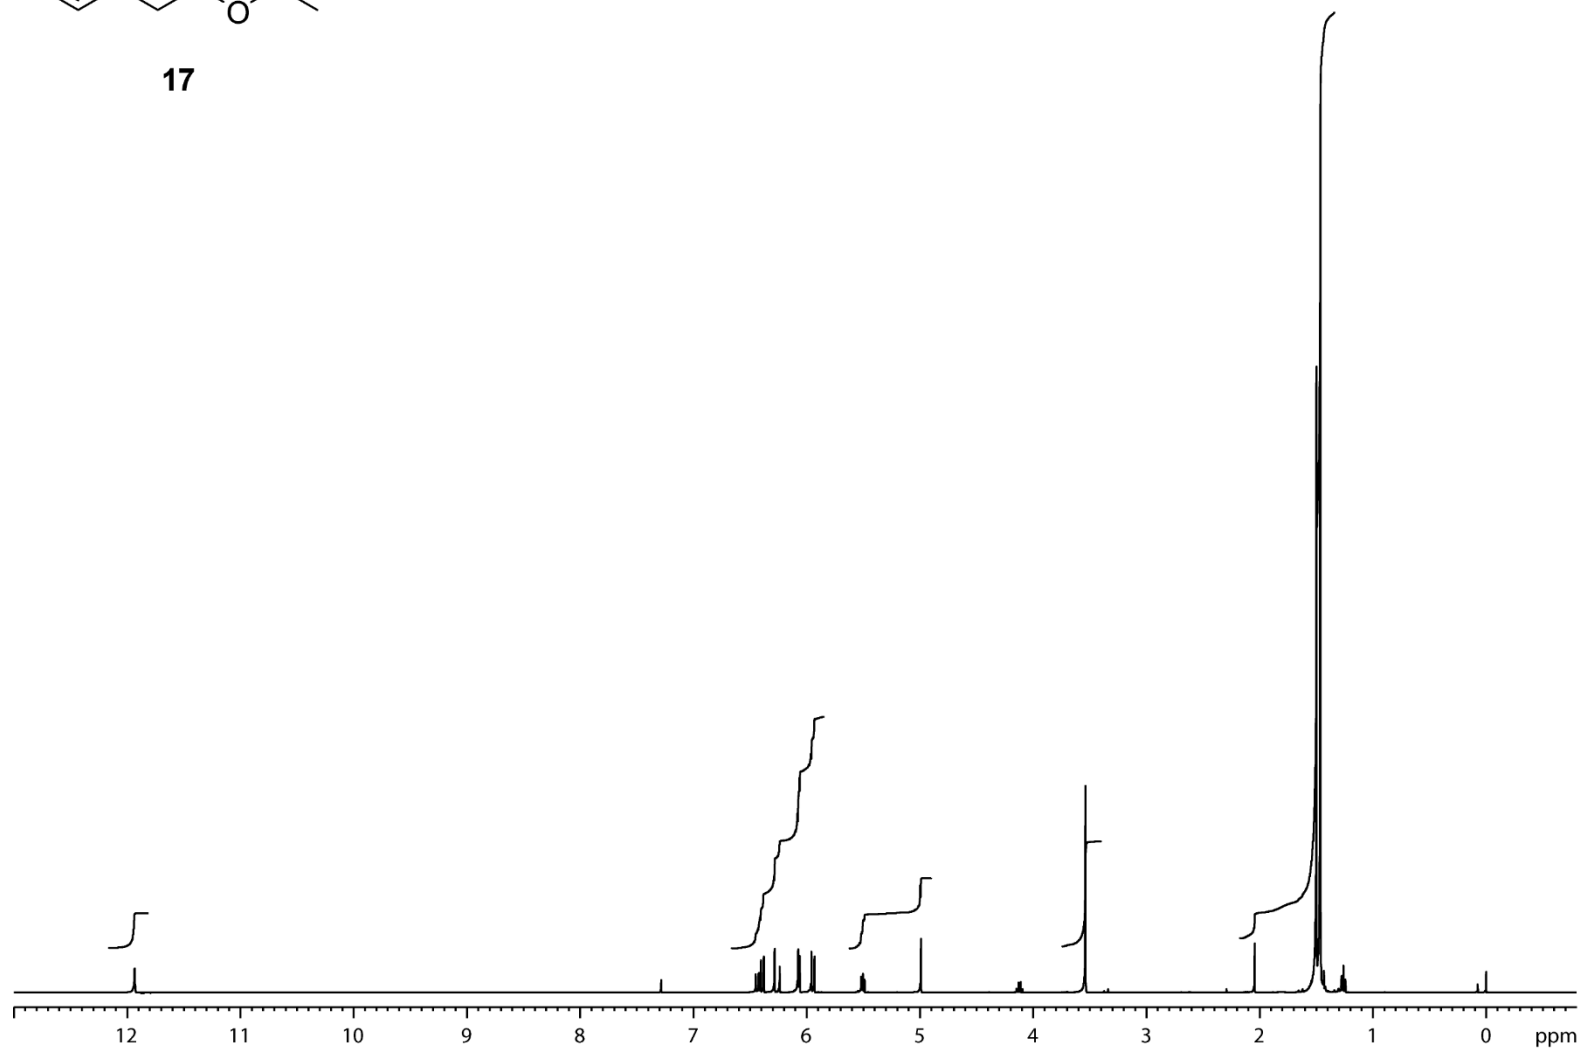

NAME rap120795\_od  
EXPNO 4  
PROCNO 1  
Date\_ 20130523  
Time 7.04  
INSTRUM AVIII400  
PROBHD 5 mm PABBO BB  
PULPROG zg30  
TD 65536  
SOLVENT CDCl3  
NS 64  
DS 2  
SWH 8223.685 Hz  
FIDRES 0.125483 Hz  
AQ 3.9846387 sec  
RG 45.2  
DW 60.800 usec  
DE 6.50 usec  
TE 296.1 K  
D1 1.00000000 sec  
TD0 1

===== CHANNEL f1 =====  
NUC1 1H  
P1 10.33 usec  
PL1 4.00 dB  
SFO1 400.4024726 MHz  
SI 32768  
SF 400.4000082 MHz  
SR 8.19 Hz  
WDW EM  
SSE 0  
LB 0.00 Hz  
GB 0  
PC 1.40  
F1P 13.000 ppm  
F2P 0.800 ppm

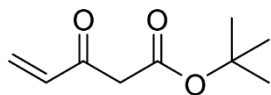

17

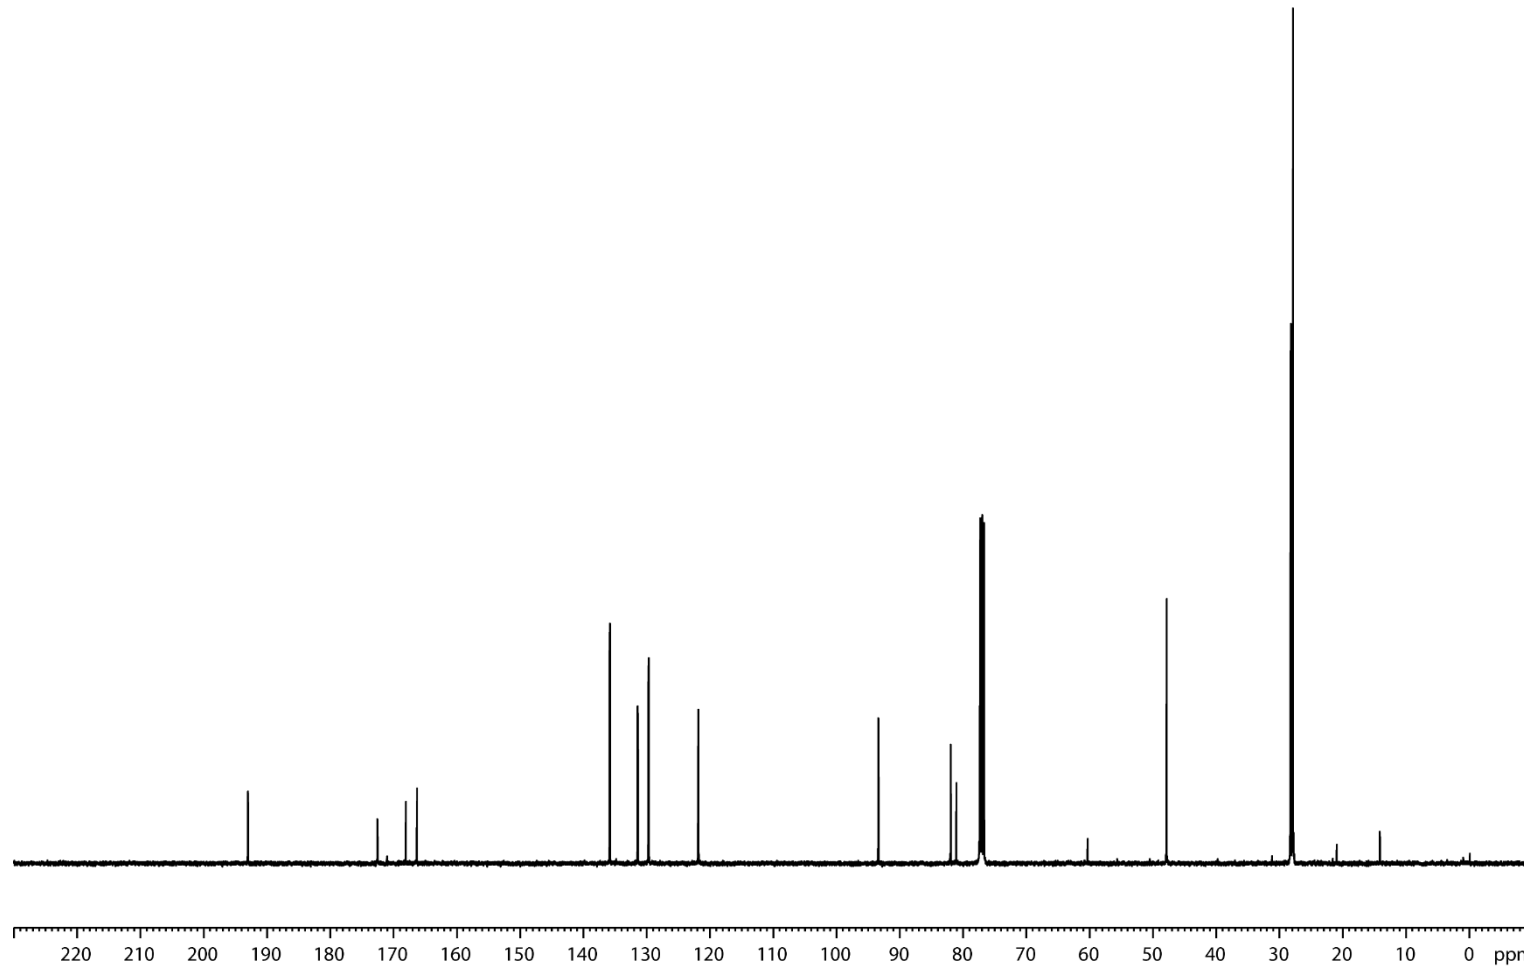

```

NAME      rap120795_od
EXPNO    2
PROCNO   1
Date_    20130521
Time     15.00
INSTRUM  AVIII400
PROBHD   5 mm PABBO BB
PULPROG  zgpg30
TD       131072
SOLVENT  CDCl3
NS       1024
DS       4
SWH      26315.789 Hz
FIDRES   0.200774 Hz
AQ       2.4904180 sec
RG       71.8
DW       19.000 usec
DE       6.50 usec
TE       298.7 K
D1       2.0000000 sec
D11      0.0300000 sec
TD0      1

===== CHANNEL f1 =====
NUC1     13C
P1       8.50 usec
PL1      3.00 dB
SFO1     100.6918371 MHz

===== CHANNEL f2 =====
CPDPRG2  waltz16
NUC2     1H
PCPD2    80.00 usec
PL2      4.00 dB
PL12     13.78 dB
PL13     14.00 dB
SFO2     400.4016016 MHz
SI       65536
SF       100.6806651 MHz
SR       4.09 Hz
WDW      EM
SSB      0
LB       1.00 Hz
GB       0
PC       1.40
F1P     230.000 ppm
F2P     10.000 ppm

```

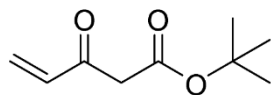

17

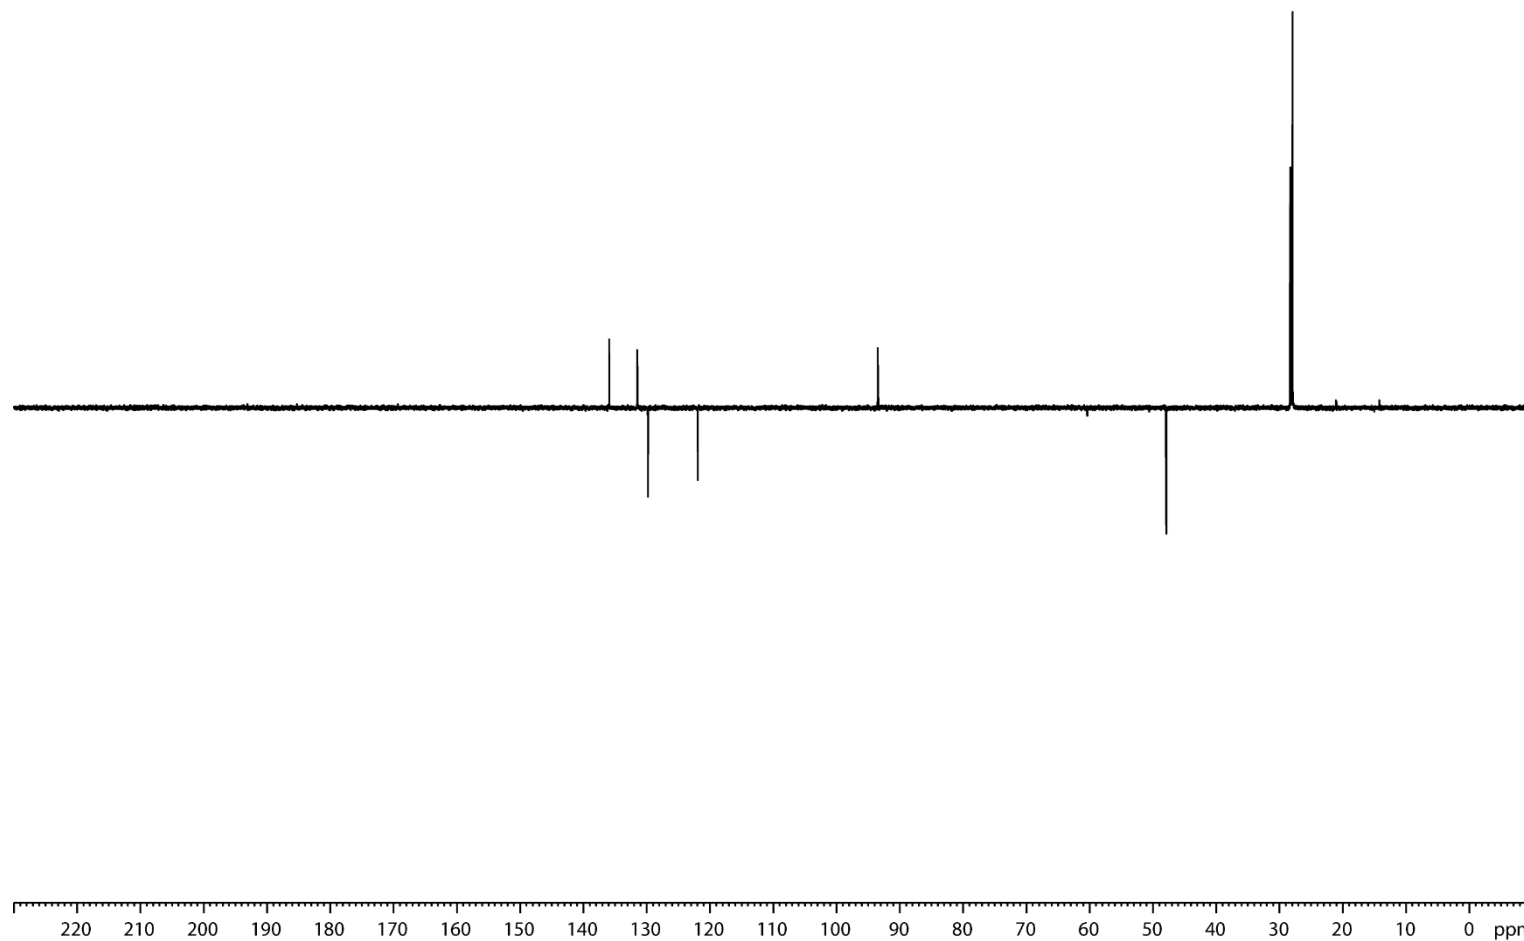

```

NAME      rap120795_od
EXPNO     1
PROCNO    1
Date_     20130521
Time      15.09
INSTRUM   AVIII400
PROBHD    5 mm PABBO BB
PULPROG   dept135
TD         131072
SOLVENT   CDCl3
NS         96
DS         4
SWH        26315.789 Hz
FIDRES     0.200774 Hz
AQ         2.4904180 sec
RG         2050
DW         19.000 usec
DE         6.50 usec
TE         298.1 K
CNST2     145.0000000
D1         2.00000000 sec
D2         0.00344828 sec
D12        0.00002000 sec
TD0        5

===== CHANNEL f1 =====
NUC1       13C
P1         8.50 usec
P2         17.00 usec
PL1        3.00 dB
SFO1       100.6918371 MHz

===== CHANNEL f2 =====
CPDPRG2    waltz16
NUC2       1H
P3         10.33 usec
P4         20.66 usec
PCPD2      80.00 usec
PL2        4.00 dB
PL12       13.78 dB
SFO2       400.4016016 MHz
SI         65536
SF         100.6806578 MHz
SR         3.20 Hz
WDW        EM
SSB        0
LB         1.00 Hz
GB         0
PC         1.40
F1P        230.000 ppm
F2P        10.000 ppm

```

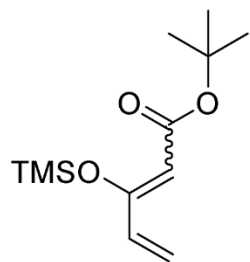

18

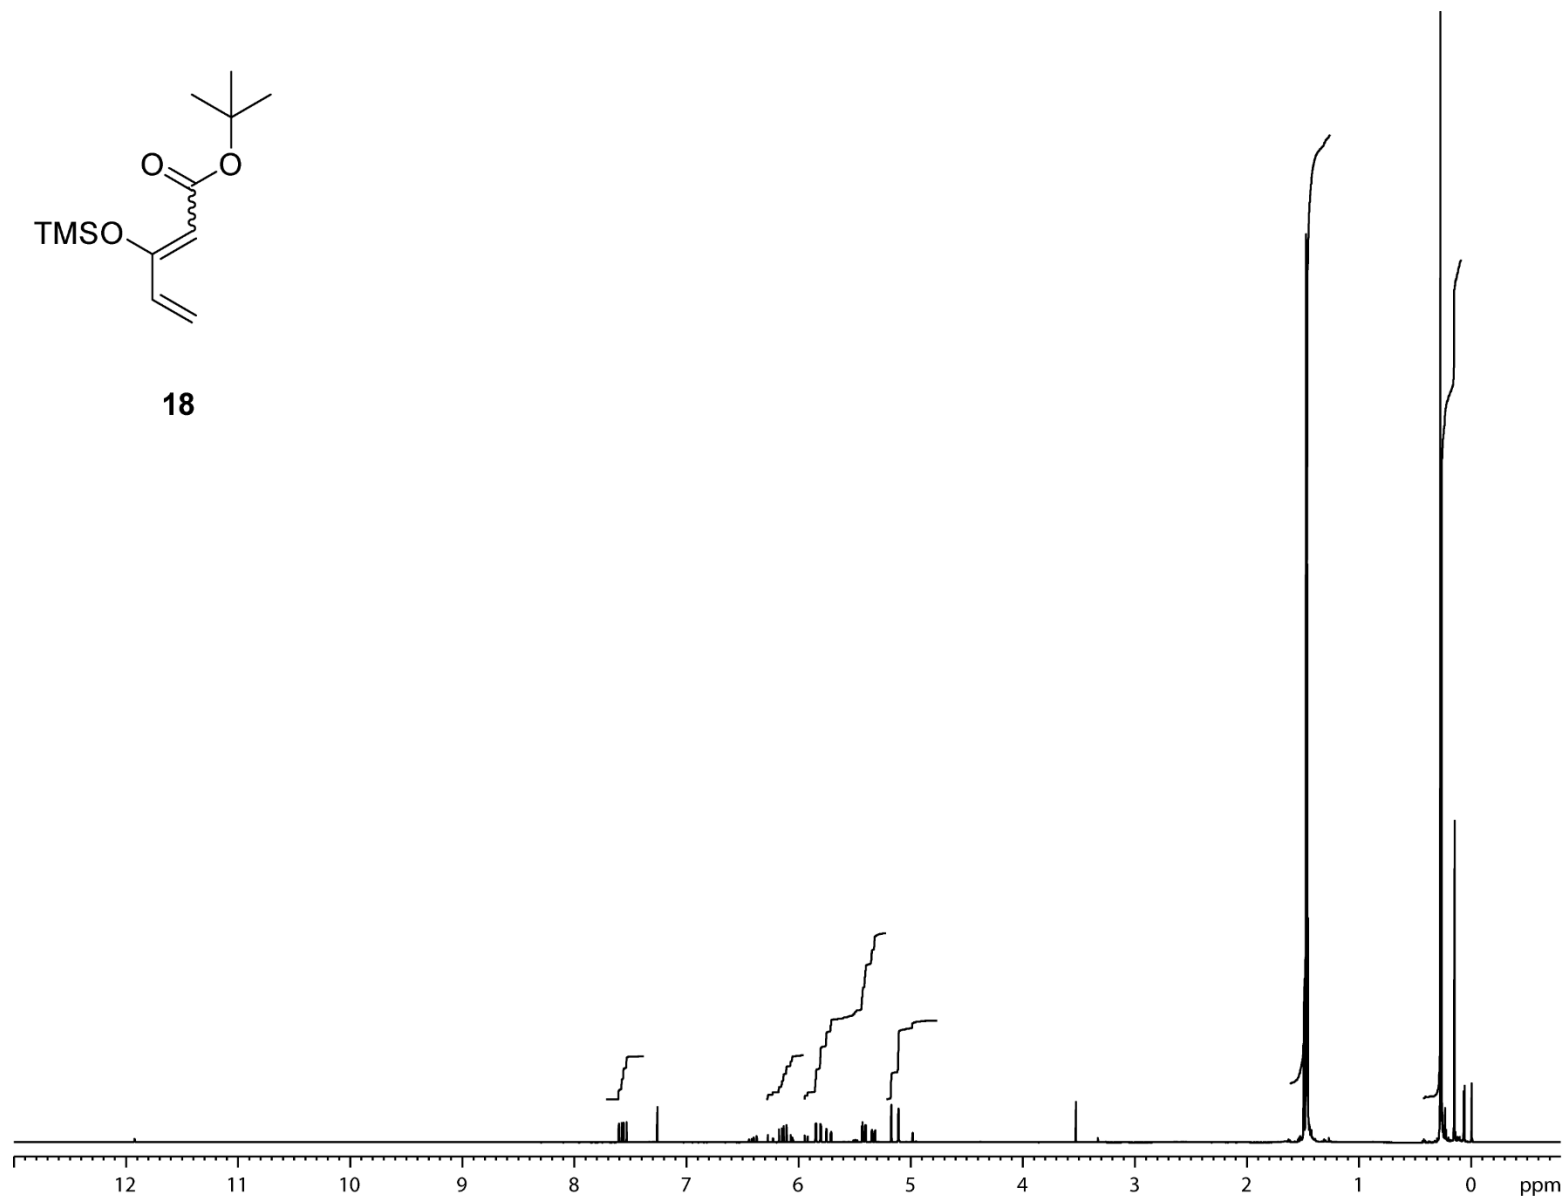

Current Data Parameters  
 NAME rap120923\_od  
 EXPNO 1  
 PROCNO 1

F2 Acquisition Parameters  
 Date\_ 20130603  
 Time 9.39  
 INSTRUM drx400  
 PROBHD 5 mm QNP 1H/13  
 PULPROG zg30  
 TD 65536  
 SOLVENT CDCl3  
 NS 64  
 DS 2  
 SWH 8278.146 Hz  
 FIDRES 0.126314 Hz  
 AQ 3.9584243 sec  
 RG 57  
 DW 60.400 usec  
 DE 6.00 usec  
 TE 298.2 K  
 D1 1.00000000 sec  
 TD0 1

===== CHANNEL f1 =====  
 NUC1 1H  
 P1 10.20 usec  
 PL1 2.00 dB  
 SFO1 399.8724688 MHz

F2 Processing parameters  
 SI 32768  
 SF 399.8700729 MHz  
 SR 72.85 Hz  
 WDW EM  
 SSB 0  
 LB 0.00 Hz  
 GB 0  
 PC 1.40

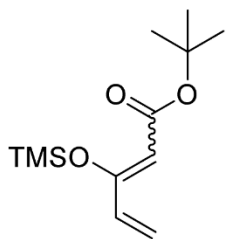

18

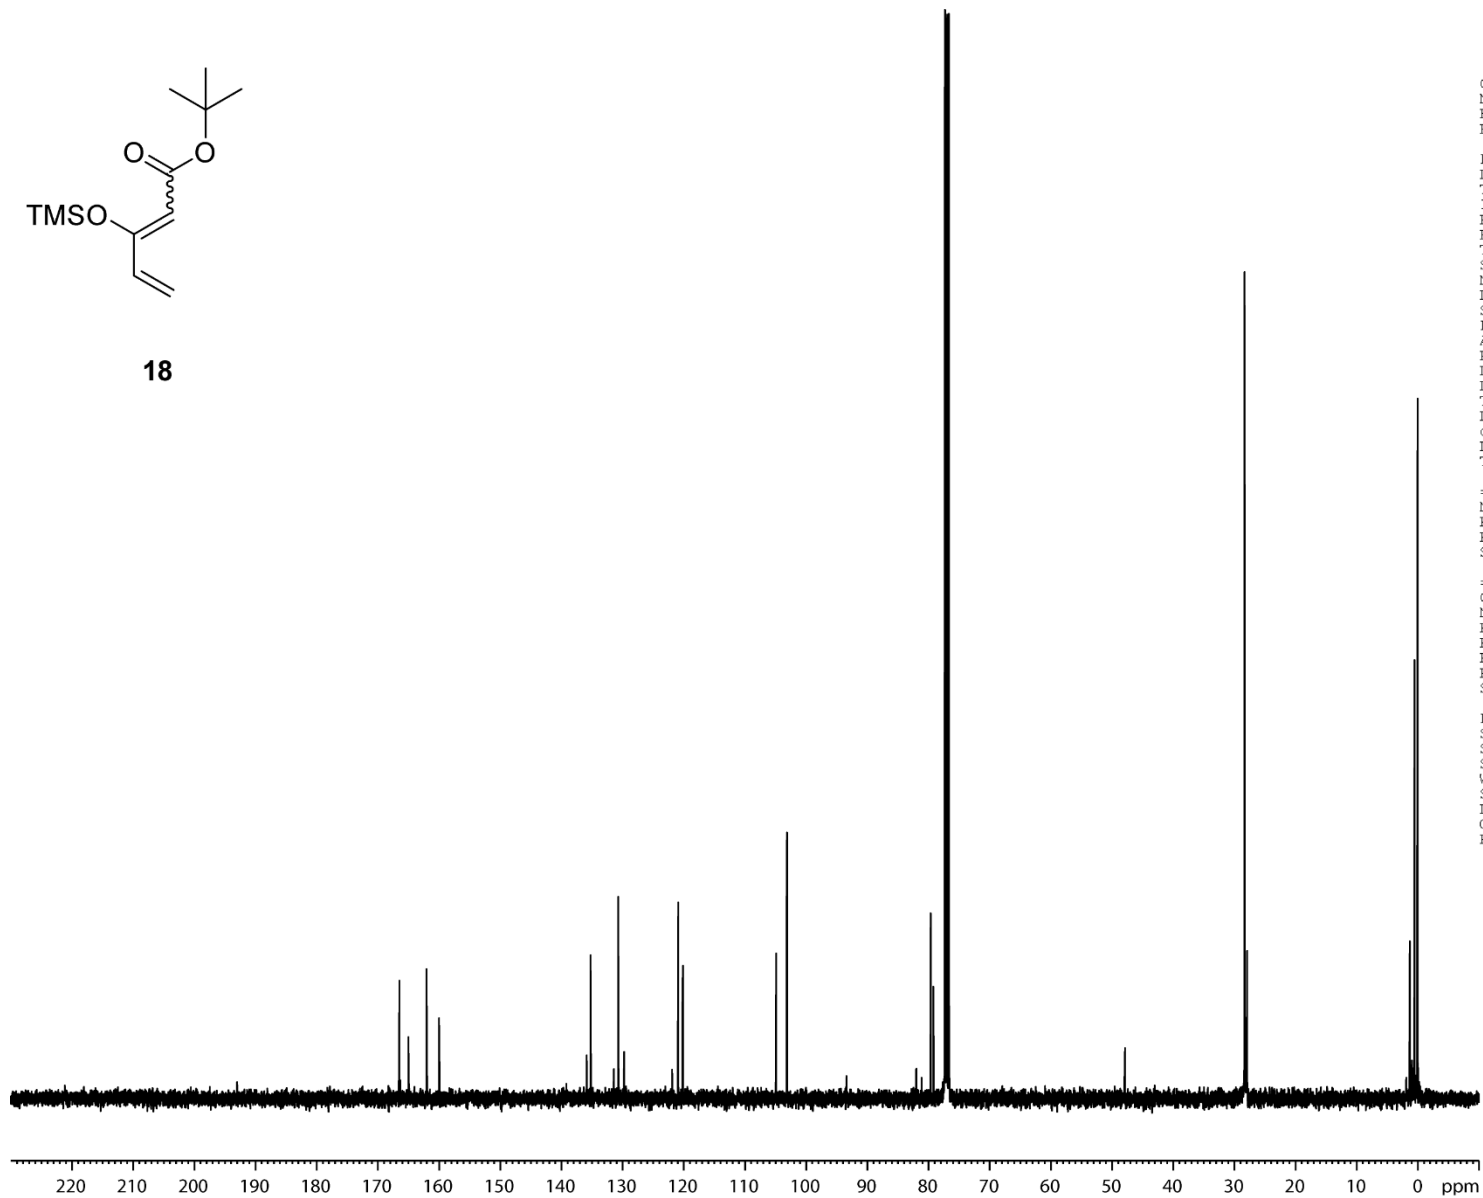

```

Current Data Parameters
NAME      rap120923_od
EXPNO     2
PROCNO    1

F2 Acquisition Parameters
Date_     20130603
Time      10.58
INSTRUM   drx400
PROBHD    5 mm QNP 1H/13
PULPROG   zgpg30
TD         131072
SOLVENT   CDCl3
NS         1024
DS         4
SWH        26315.789 Hz
FIDRES     0.200774 Hz
AQ         2.4904180 sec
RG         6502
DW         19.000 usec
DE         6.00 usec
TE         299.2 K
D1         2.0000000 sec
d11        0.0300000 sec
DELTA     1.89999998 sec
TD0        1

===== CHANNEL f1 =====
NUC1       13C
P1         11.00 usec
PL1        3.00 dB
SFO1       100.5585542 MHz

===== CHANNEL f2 =====
CPDPRG2   waltz16
NUC2       1H
PCPD2      80.00 usec
PL2        2.00 dB
PL12       16.06 dB
PL13       16.06 dB
SFO2       399.8715995 MHz

F2 Processing parameters
SI         65536
SF         100.5473940 MHz
SR         2.01 Hz
WDW        EM
SSB        0
LB         1.00 Hz
GB         0
PC         1.40

```

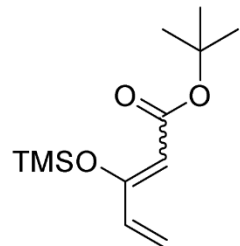

18

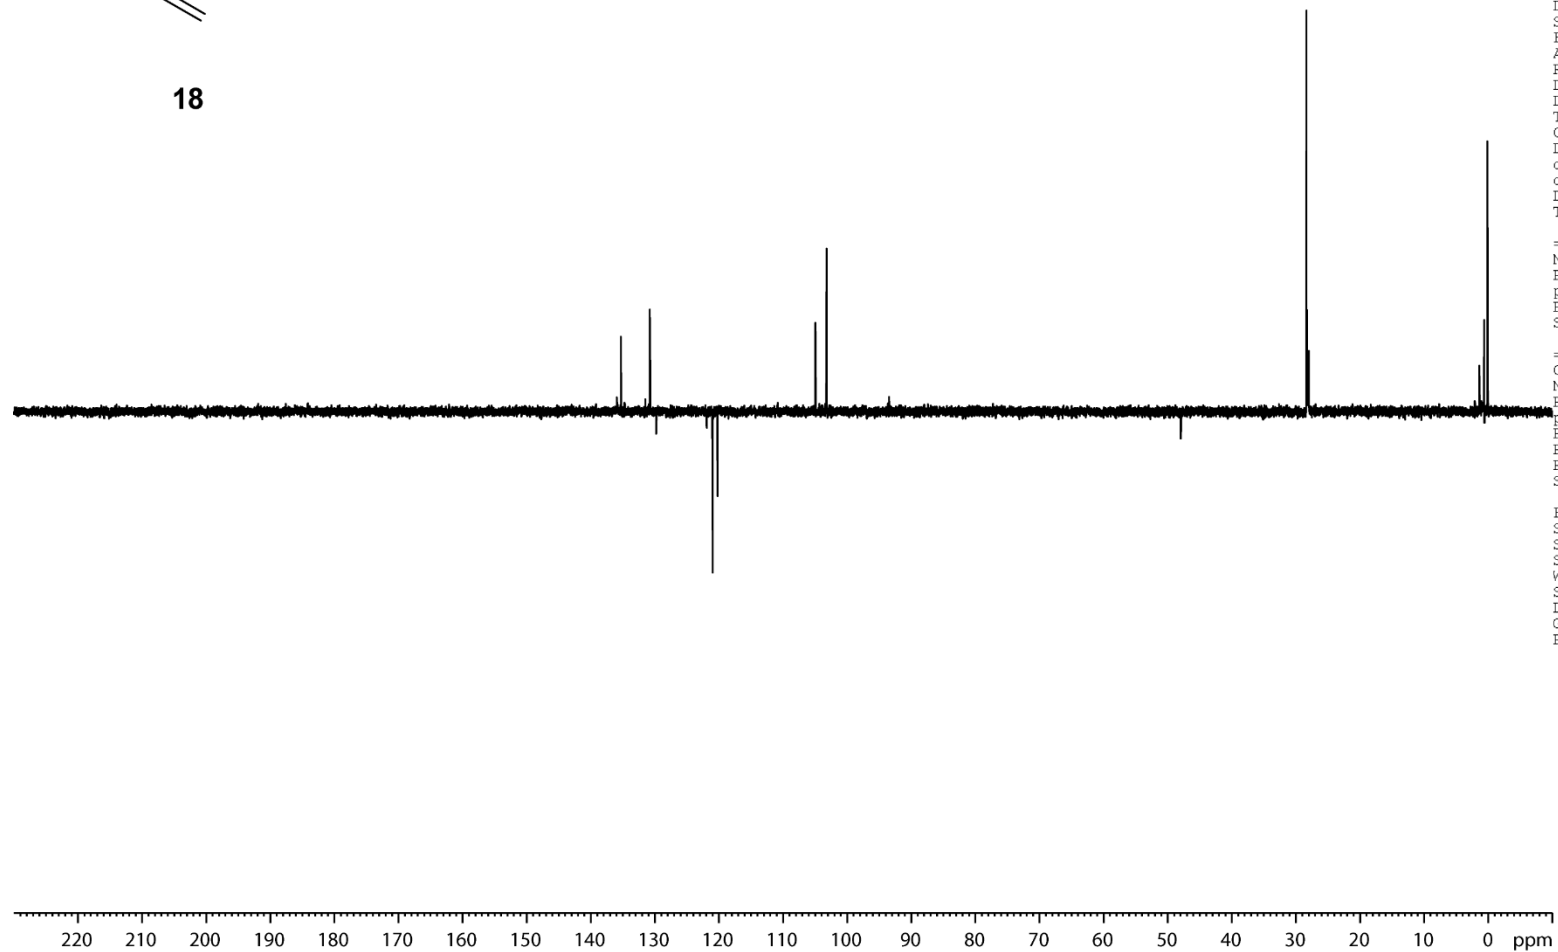

Current Data Parameters  
 NAME rap120923\_od  
 EXPNO 3  
 PROCNO 1

F2 Acquisition Parameters  
 Date\_ 20130603  
 Time 11.38  
 INSTRUM drx400  
 PROBHD 5 mm QNP 1H/13  
 PULPROG dept135  
 TD 131072  
 SOLVENT CDCl3  
 NS 512  
 DS 4  
 SWH 26315.789 Hz  
 FIDRES 0.200774 Hz  
 AQ 2.4904180 sec  
 RG 9195.2  
 DW 19.000 usec  
 DE 7.00 usec  
 TE 298.2 K  
 CNST2 145.0000000  
 D1 2.0000000 sec  
 d2 0.00344828 sec  
 d12 0.00002000 sec  
 DELTA 0.00001401 sec  
 TDO 1

===== CHANNEL f1 =====  
 NUC1 13C  
 P1 11.00 usec  
 p2 22.00 usec  
 PL1 3.00 dB  
 SFO1 100.5585542 MHz

===== CHANNEL f2 =====  
 CPDPRG2 waltz16  
 NUC2 1H  
 P3 10.00 usec  
 p4 20.00 usec  
 PCPD2 80.00 usec  
 PL2 2.00 dB  
 PL12 16.06 dB  
 SFO2 399.8715995 MHz

F2 Processing parameters  
 SI 65536  
 SF 100.5473888 MHz  
 SR 3.20 Hz  
 WDN EM  
 SSB 0  
 LB 1.00 Hz  
 GB 0  
 PC 1.40

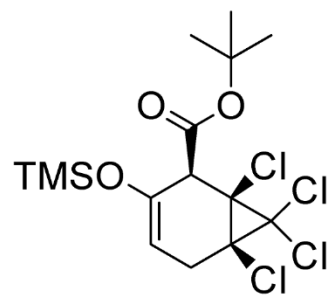

19

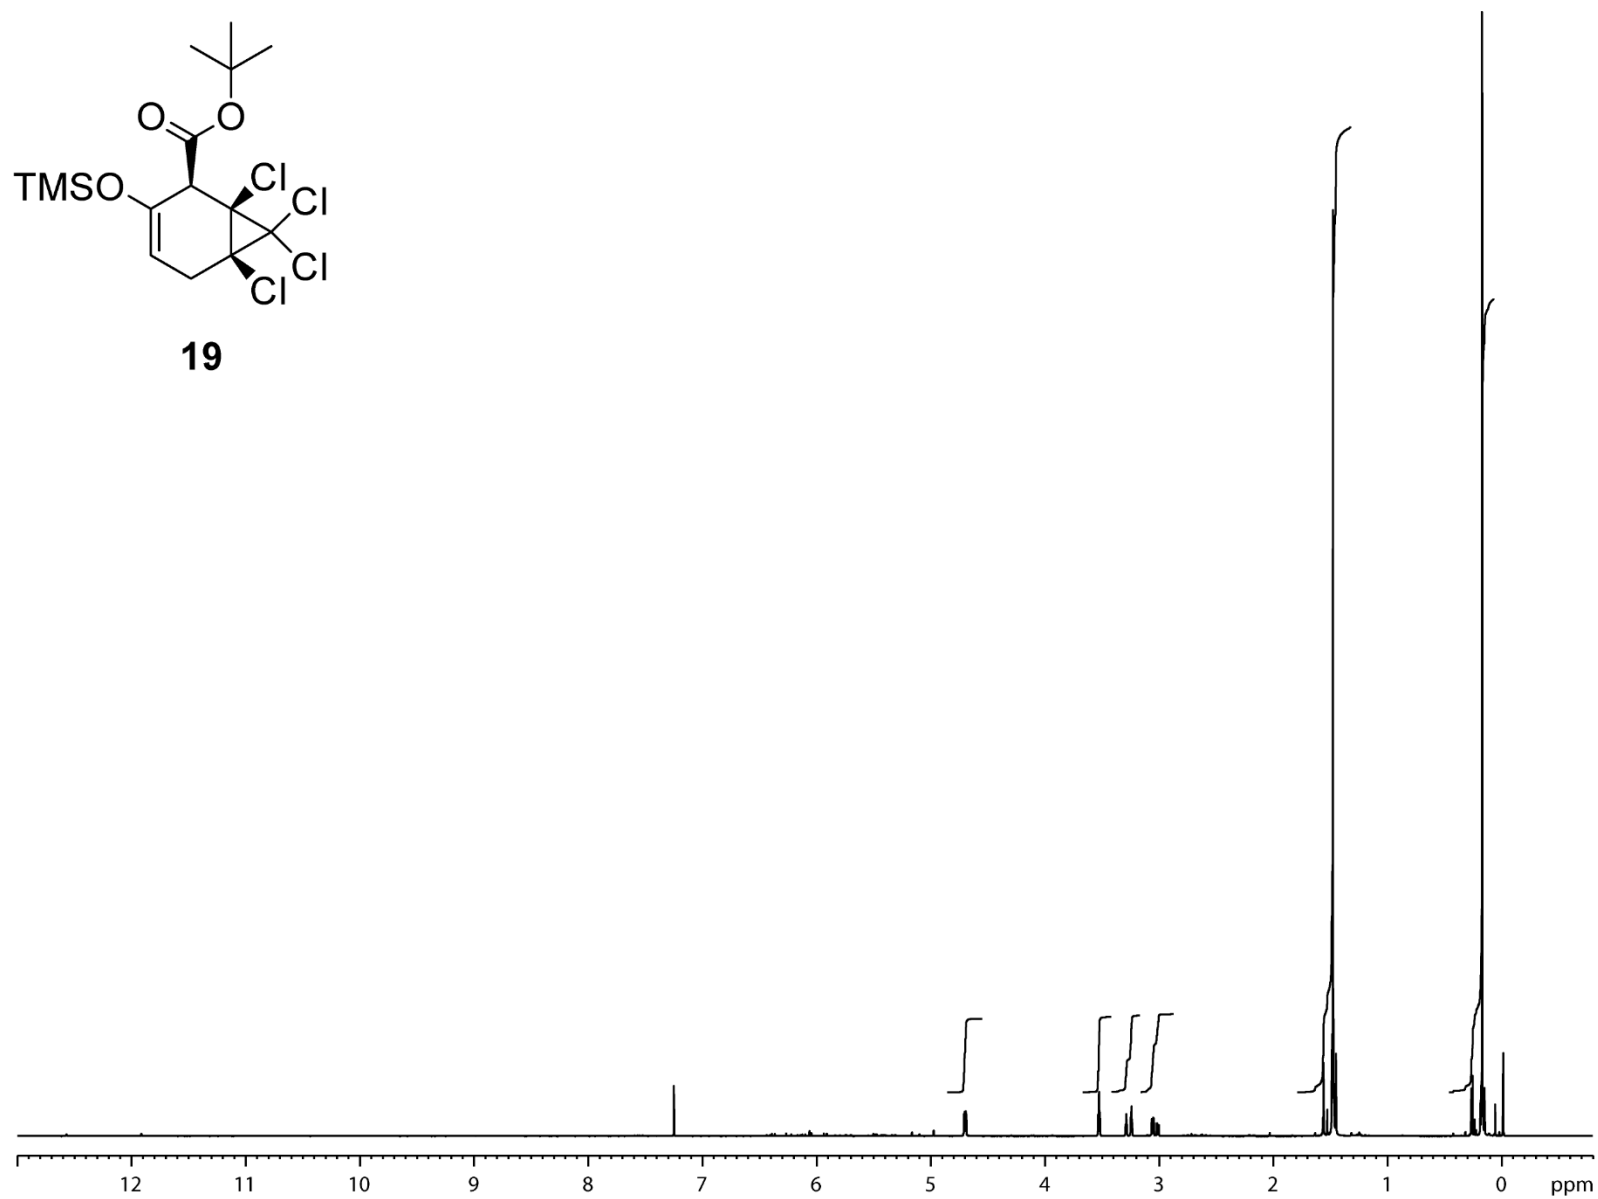

Current Data Parameters  
 NAME rap120964\_od  
 EXPNO 1  
 PROCNO 1

F2 Acquisition Parameters  
 Date\_ 20130606  
 Time 11.06  
 INSTRUM drx400  
 PROBHD 5 mm QNP 1H/13  
 PULPROG zg30  
 TD 65536  
 SOLVENT CDCl3  
 NS 64  
 DS 2  
 SWH 8278.146 Hz  
 FIDRES 0.126314 Hz  
 AQ 3.9584243 sec  
 RG 114  
 DW 60.400 usec  
 DE 6.00 usec  
 TE 298.2 K  
 D1 1.00000000 sec  
 TD0 1

===== CHANNEL f1 =====  
 NUC1 1H  
 P1 10.20 usec  
 PL1 2.00 dB  
 SFO1 399.8724688 MHz

F2 Processing parameters  
 SI 32768  
 SF 399.8700862 MHz  
 SR 86.18 Hz  
 WDW EM  
 SSB 0  
 LB 0.00 Hz  
 GB 0  
 PC 1.40

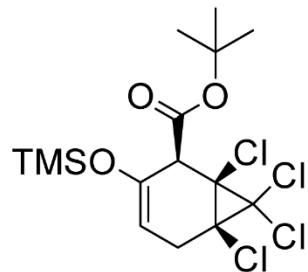

19

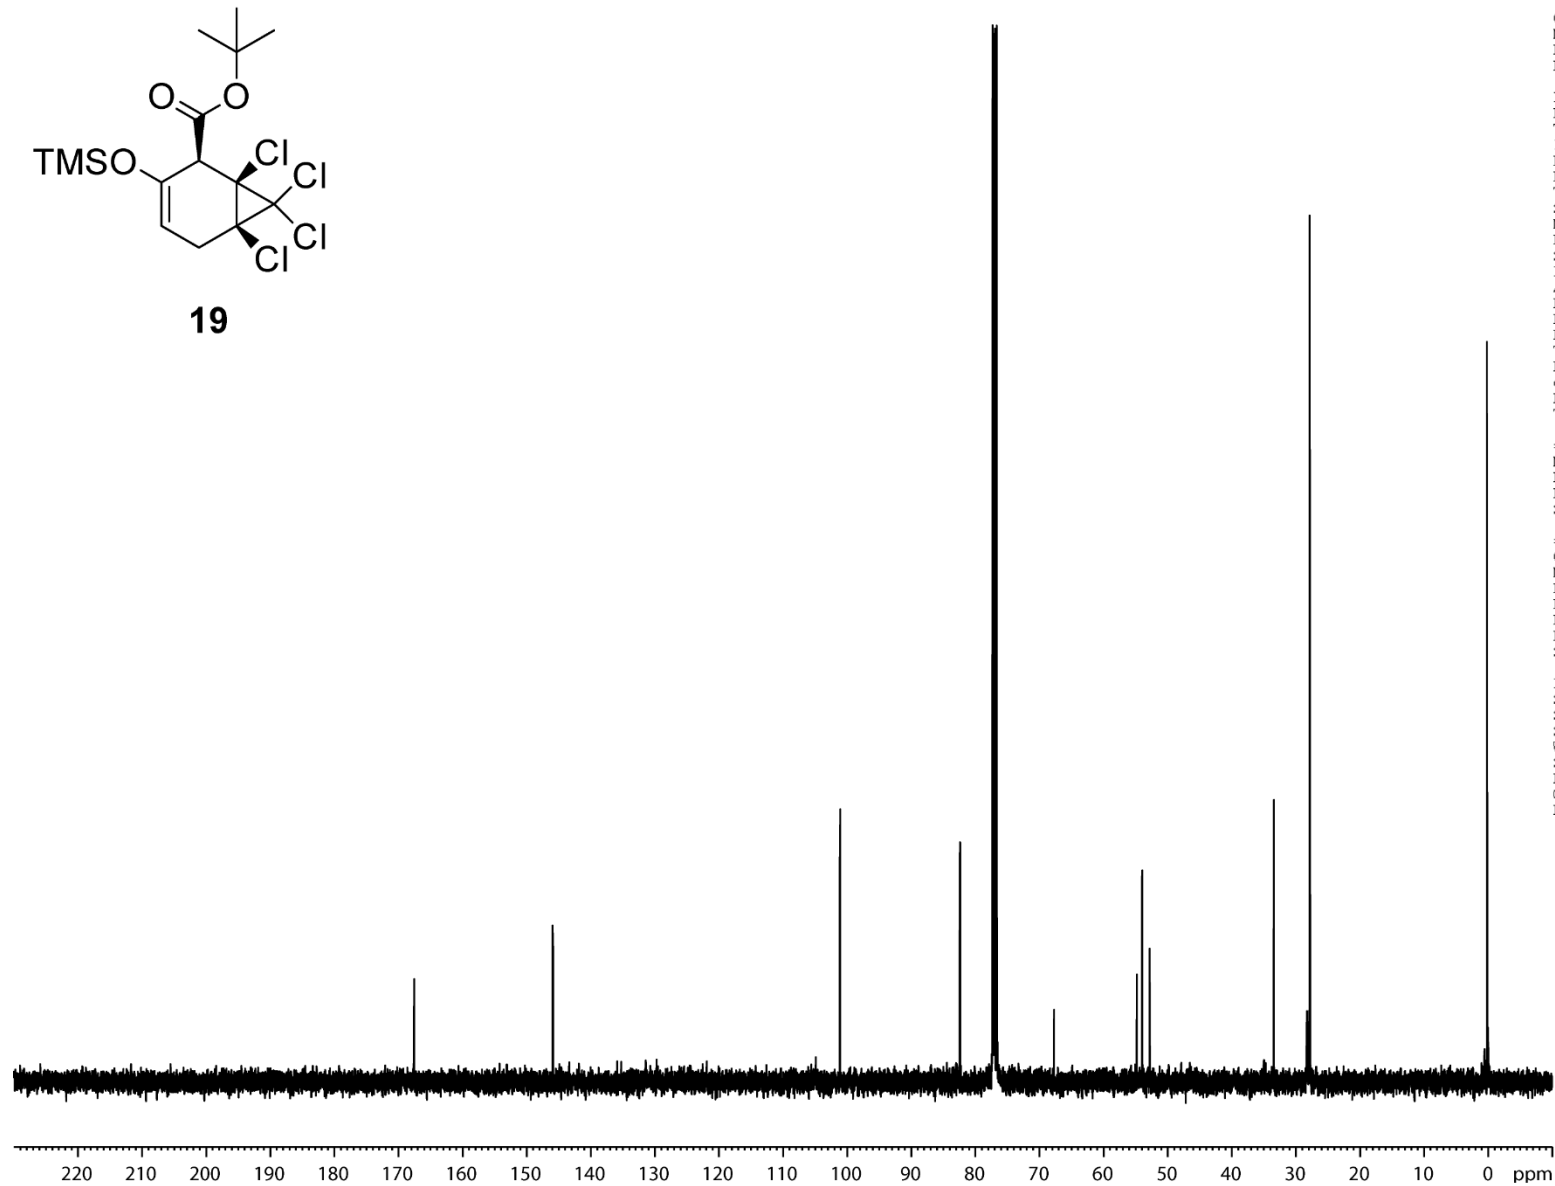

Current Data Parameters  
 NAME rap120964\_od  
 EXPNO 2  
 PROCNO 1

F2 Acquisition Parameters  
 Date\_ 20130606  
 Time 11.27  
 INSTRUM drx400  
 PROBHD 5 mm QNP 1H/13  
 PULPROG zgpg30  
 TD 131072  
 SOLVENT CDCl3  
 NS 1024  
 DS 4  
 SWH 26315.789 Hz  
 FIDRES 0.200774 Hz  
 AQ 2.4904180 sec  
 RG 9195.2  
 DW 19.000 usec  
 DE 6.00 usec  
 TE 299.2 K  
 D1 2.00000000 sec  
 d11 0.03000000 sec  
 DELTA 1.89999998 sec  
 TDO 1

===== CHANNEL f1 =====  
 NUC1 13C  
 P1 11.00 usec  
 PL1 3.00 dB  
 SFO1 100.5585542 MHz

===== CHANNEL f2 =====  
 CPDPRG2 waltz16  
 NUC2 1H  
 PCD2 80.00 usec  
 PL2 2.00 dB  
 PL12 16.06 dB  
 PL13 16.06 dB  
 SFO2 399.8715995 MHz

F2 Processing parameters  
 SI 65536  
 SF 100.5473936 MHz  
 SR 1.61 Hz  
 WDN EM  
 SSB 0  
 LB 1.00 Hz  
 GB 0  
 PC 1.40



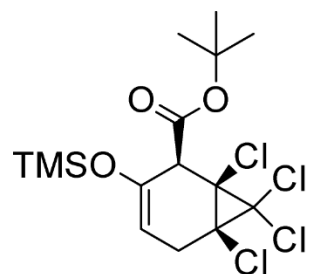

19

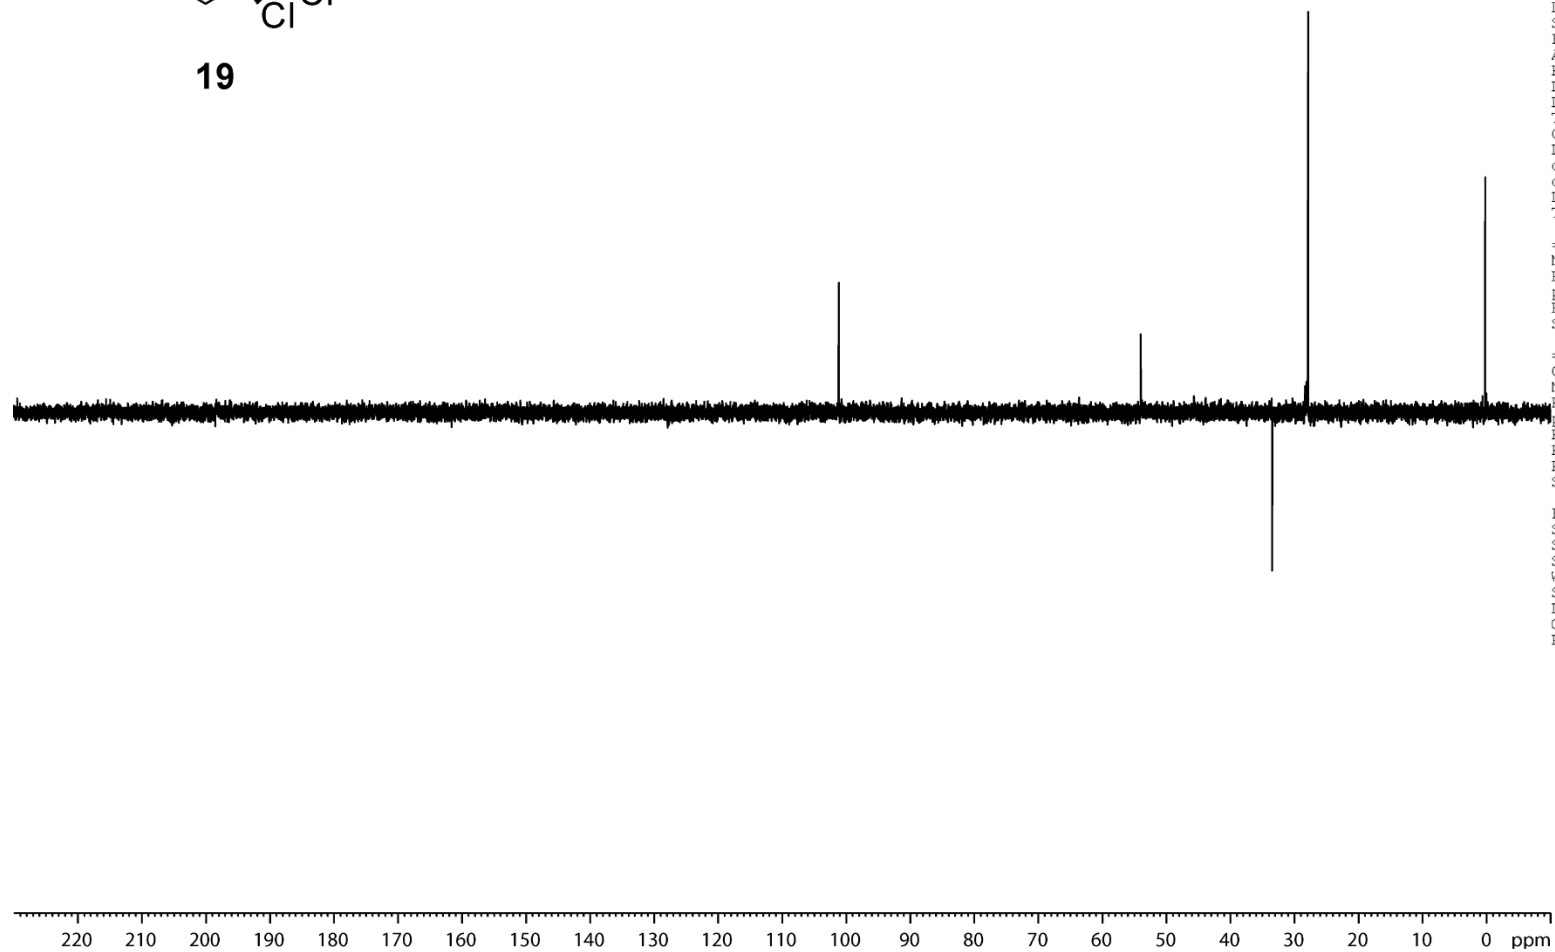

Current Data Parameters  
 NAME rap120964\_od  
 EXPNO 3  
 PROCNO 1

F2 Acquisition Parameters  
 Date\_ 20130606  
 Time 12.33  
 INSTRUM drx400  
 PROBHD 5 mm QNP 1H/13  
 PULPROG dept135  
 TD 131072  
 SOLVENT CDCl3  
 NS 192  
 DS 4  
 SWH 26315.789 Hz  
 FIDRES 0.200774 Hz  
 AQ 2.4904180 sec  
 RG 8192  
 DW 19.000 usec  
 DE 7.00 usec  
 TE 299.2 K  
 CNST2 145.0000000  
 D1 2.0000000 sec  
 d2 0.00344828 sec  
 d12 0.00002000 sec  
 DELTA 0.00001401 sec  
 TD0 1

===== CHANNEL f1 =====  
 NUC1 13C  
 P1 11.00 usec  
 p2 22.00 usec  
 PL1 3.00 dB  
 SFO1 100.5585542 MHz

===== CHANNEL f2 =====  
 CPDPRG2 waltz16  
 NUC2 1H  
 P3 10.00 usec  
 p4 20.00 usec  
 PCPD2 80.00 usec  
 PL2 2.00 dB  
 PL12 16.06 dB  
 SFO2 399.8715995 MHz

F2 Processing parameters  
 SI 65536  
 SF 100.5473888 MHz  
 SR 3.20 Hz  
 WDW EM  
 SSE 0  
 LB 1.00 Hz  
 GB 0  
 PC 1.40

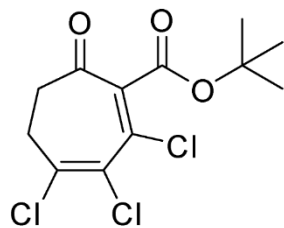

20

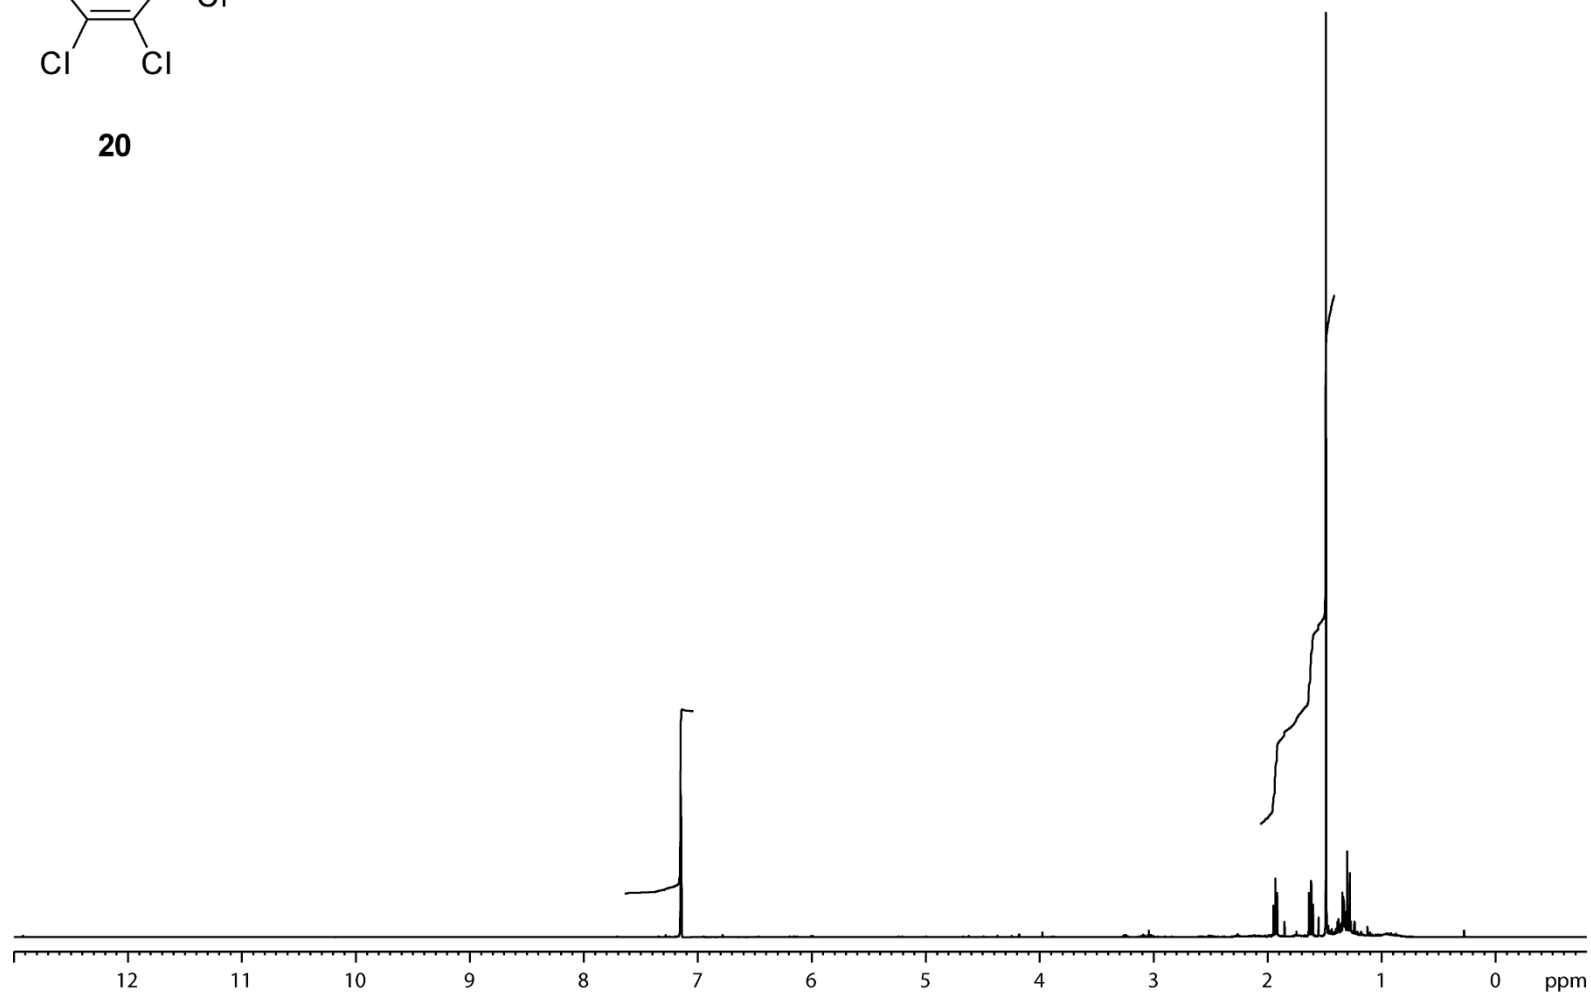

Current Data Parameters  
 NAME rap122191\_od  
 EXPNO 1  
 PROCNO 1

F2 Acquisition Parameters  
 Date\_ 20131009  
 Time 12.59  
 INSTRUM drx400  
 PROBHD 5 mm QNP 1H/13  
 PULPROG zg30  
 TD 65536  
 SOLVENT C6D6  
 NS 64  
 DS 2  
 SWH 8278.146 Hz  
 FIDRES 0.126314 Hz  
 AQ 3.9584243 sec  
 RG 101.6  
 DW 60.400 usec  
 DE 6.00 usec  
 TE 297.2 K  
 D1 1.00000000 sec  
 TD0 1

==== CHANNEL f1 =====  
 NUC1 1H  
 P1 10.20 usec  
 PL1 2.00 dB  
 SFO1 399.8524687 MHz

F2 Processing parameters  
 SI 32768  
 SF 399.8500407 MHz  
 SR 40.68 Hz  
 WDW EM  
 SSB 0  
 LB 0.00 Hz  
 GB 0  
 PC 1.40

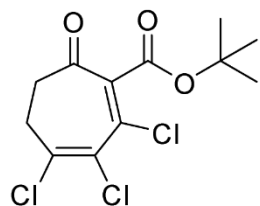

20

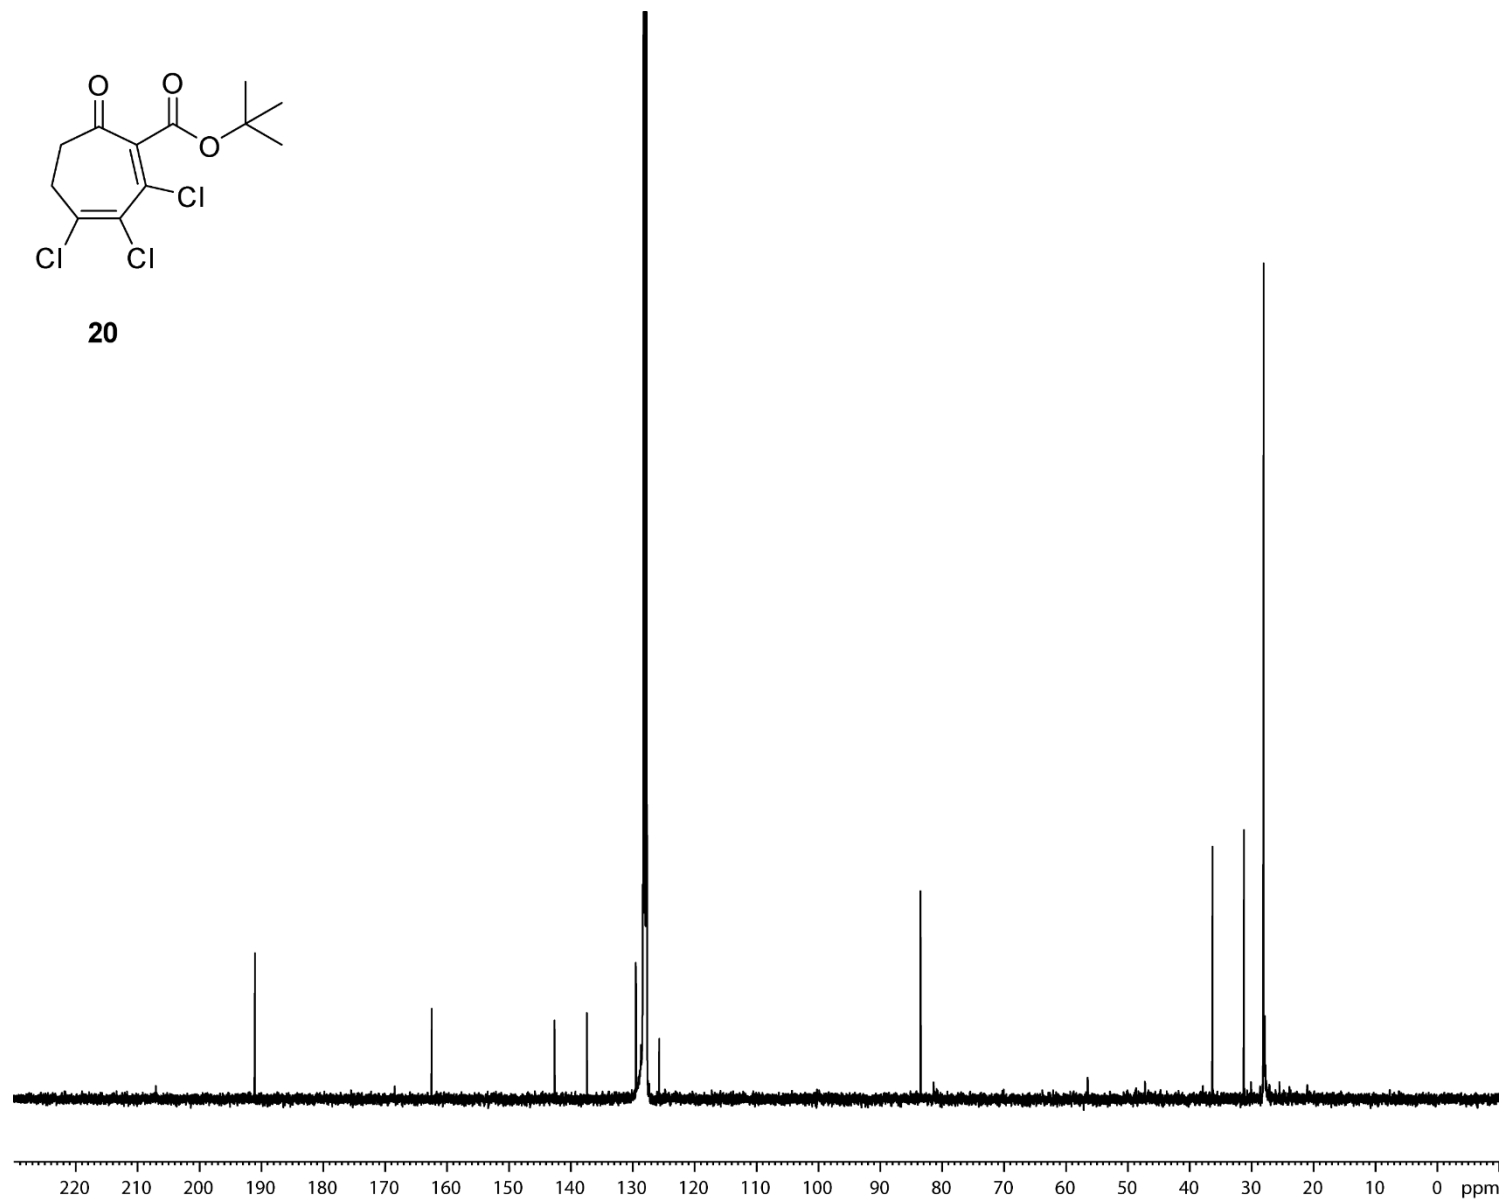

```

Current Data Parameters
NAME      rap122191_od
EXPNO     2
PROCNO    1

F2 Acquisition Parameters
Date_     20131009
Time      16.53
INSTRUM   drx400
PROBHD    5 mm QNP 1H/13
PULPROG   zgpg30
TD         131072
SOLVENT   C6D6
NS         3072
DS         4
SWH        26315.789 Hz
FIDRES     0.200774 Hz
AQ         2.4904180 sec
RG         7298.2
BW         19.000 usec
DE         6.00 usec
TE         298.2 K
D1         2.00000000 sec
d11        0.03000000 sec
DELTA      1.89999998 sec
TD0        1

===== CHANNEL f1 =====
NUC1       13C
P1         11.00 usec
PL1        3.00 dB
SFO1       100.5535241 MHz

===== CHANNEL f2 =====
CPDPRG2   waltz16
NUC2       1H
PCPD2      80.00 usec
PL2        2.00 dB
PL12       16.06 dB
PL13       16.06 dB
SFO2       399.8515994 MHz

F2 Processing parameters
SI         65536
SF         100.5423266 MHz
SR         36.36 Hz
MDW        EM
SSB        0
LB         1.00 Hz
GB         0
PC         1.40

```

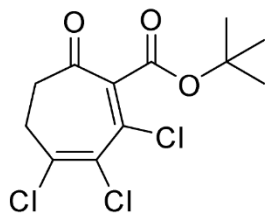

20

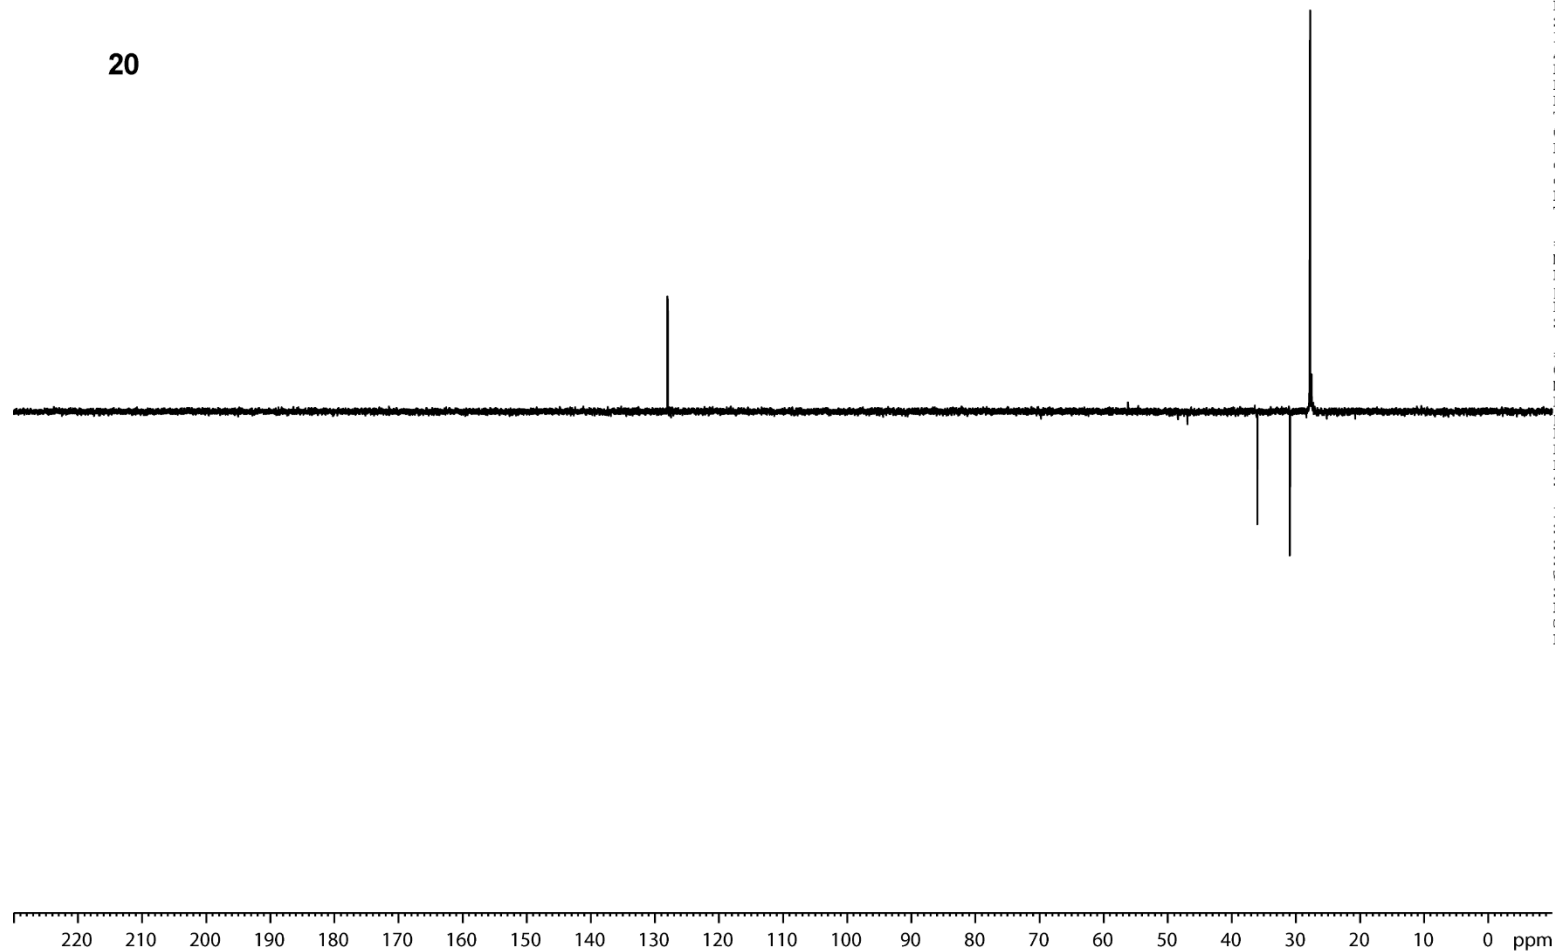

Current Data Parameters  
 NAME rap122191\_od  
 EXPNO 3  
 PROCNO 1

F2 Acquisition Parameters  
 Date\_ 20131009  
 Time 18.12  
 INSTRUM drx400  
 PROCPRG 5 mm QNP 1H/13  
 PULPROG dept135  
 TD 131072  
 SOLVENT C6D6  
 NS 1024  
 DS 4  
 SWH 26315.789 Hz  
 FIDRES 0.200774 Hz  
 AQ 2.4904180 sec  
 RG 9195.2  
 DW 19.000 usec  
 DE 7.00 usec  
 TE 298.2 K  
 CNST2 145.0000000  
 D1 2.0000000 sec  
 d2 0.00344828 sec  
 d12 0.00002000 sec  
 DELTA 0.00001401 sec  
 TD0 1

===== CHANNEL f1 =====  
 NUC1 13C  
 P1 11.00 usec  
 p2 23.00 usec  
 PL1 3.00 dB  
 SFO1 100.5535241 MHz

===== CHANNEL f2 =====  
 CPDPRG2 waltz16  
 NUC2 1H  
 P3 10.00 usec  
 p4 20.00 usec  
 PCPD2 80.00 usec  
 PL2 2.00 dB  
 PL12 16.06 dB  
 SFO2 399.8515994 MHz

F2 Processing parameters  
 SI 65536  
 SF 100.5423561 MHz  
 SR 6.92 Hz  
 WDN EM  
 SSB 0  
 LB 1.00 Hz  
 GB 0  
 PC 1.40

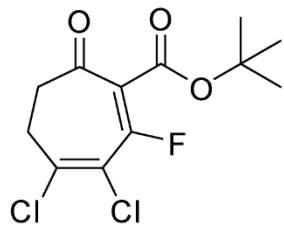

21

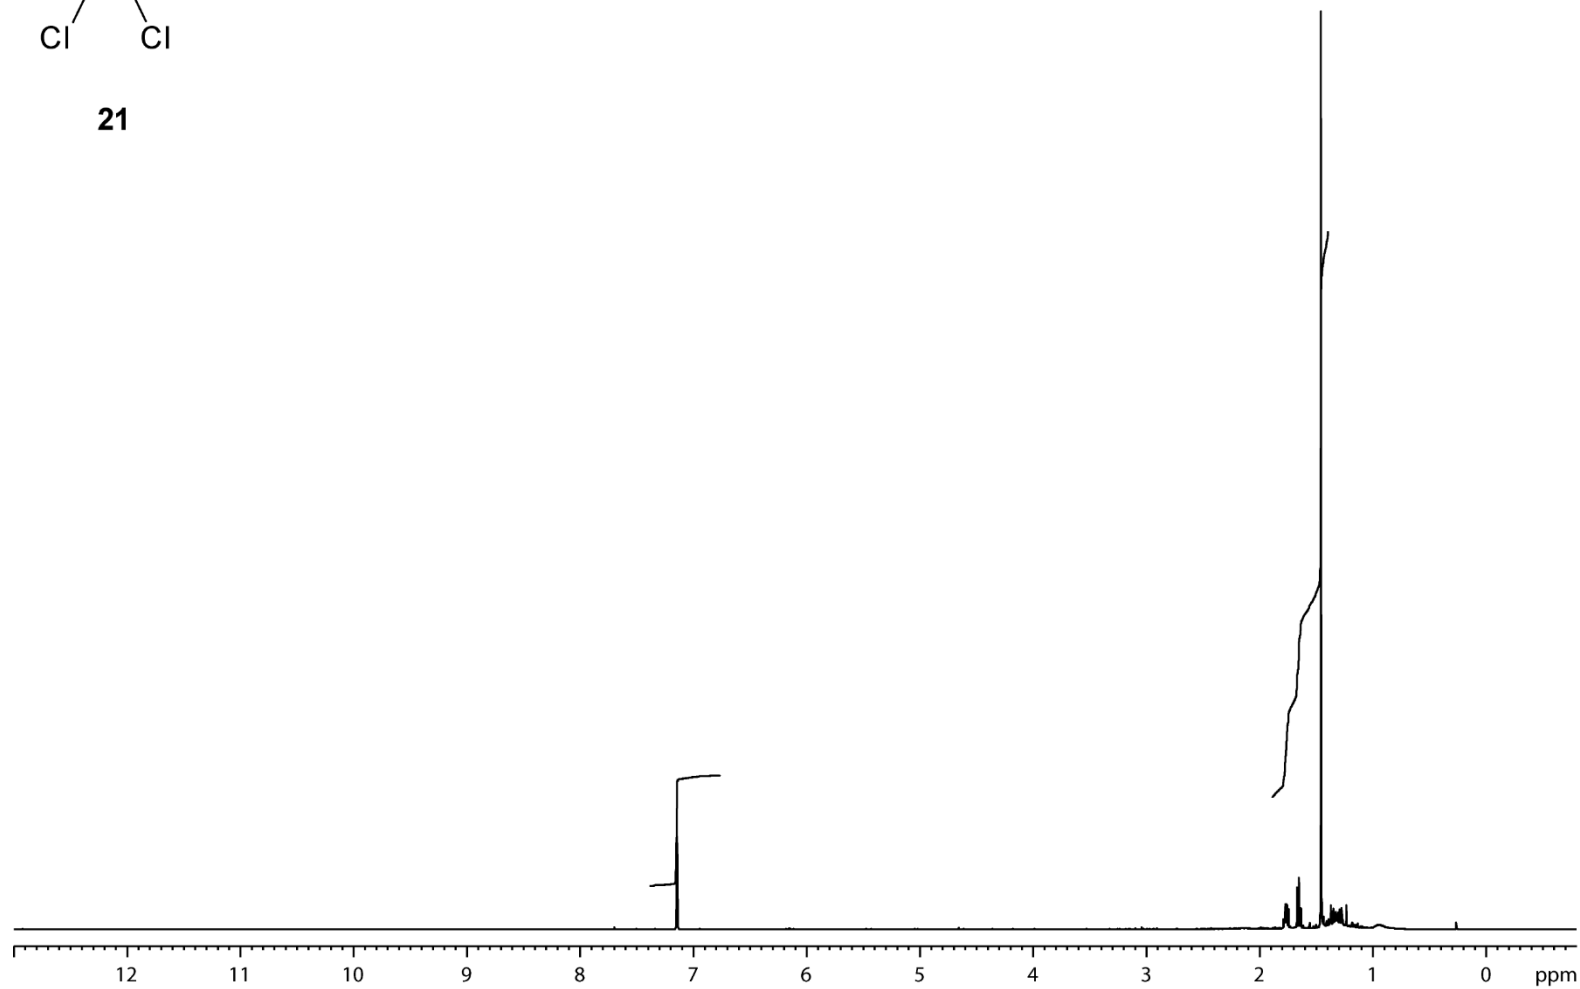

Current Data Parameters  
 NAME rap122192\_od  
 EXPNO 1  
 PROCNO 1

F2 Acquisition Parameters  
 Date\_ 20131009  
 Time 18.22  
 INSTRUM drx400  
 PROBHD 5 mm QNP 1H/13  
 PULPROG zg30  
 TD 65536  
 SOLVENT C6D6  
 NS 64  
 DS 2  
 SWH 8278.146 Hz  
 FIDRES 0.126314 Hz  
 AQ 3.9584243 sec  
 RG 71.8  
 DW 60.400 usec  
 DE 6.00 usec  
 TE 297.2 K  
 D1 1.00000000 sec  
 TDO 1

==== CHANNEL f1 =====  
 NUC1 1H  
 P1 10.20 usec  
 PL1 2.00 dB  
 SFO1 399.8524687 MHz

F2 Processing parameters  
 SI 32768  
 SF 399.8500000 MHz  
 SR 0.00 Hz  
 WDW EM  
 SSB 0  
 LB 0.00 Hz  
 GB 0  
 PC 1.40

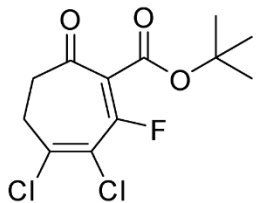

21

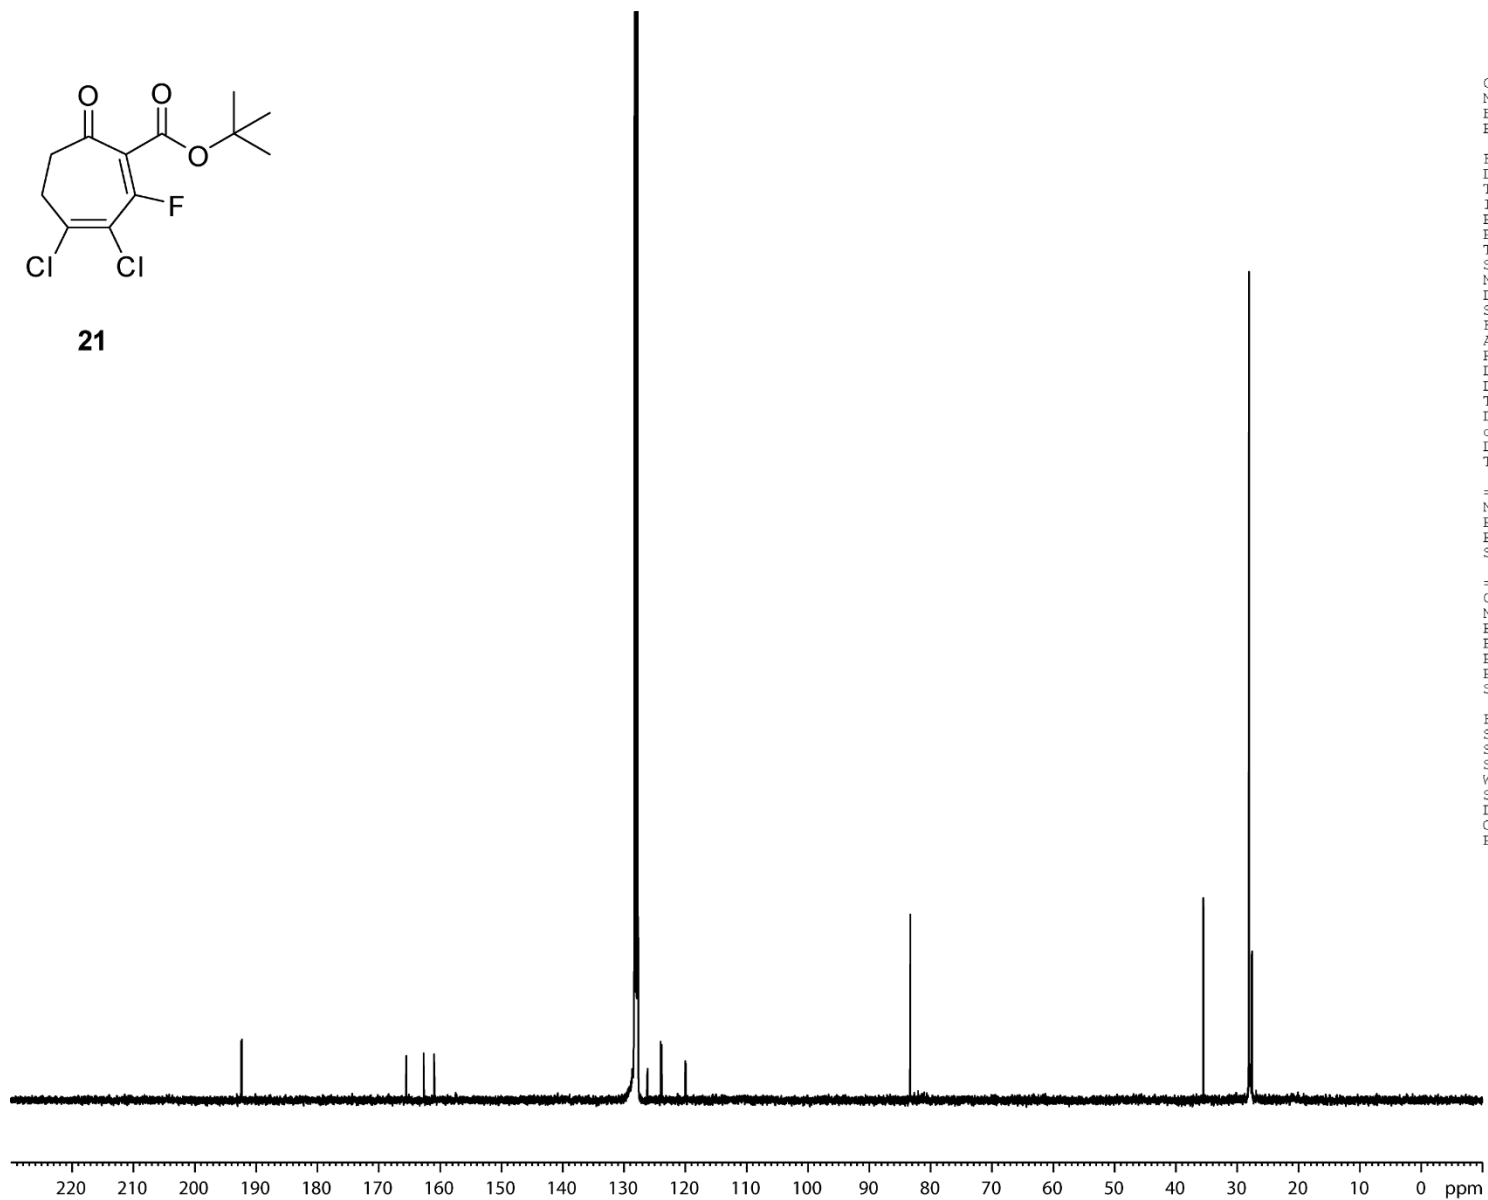

Current Data Parameters  
 NAME rap122192\_od  
 EXPNO 2  
 PROCNO 1

F2 Acquisition Parameters  
 Date\_ 20131009  
 Time 20:59  
 INSTRUM drx400  
 PROBHD 5 mm QNP 1H/13  
 PULPROG zgpg30  
 TD 131072  
 SOLVENT C6D6  
 NS 2048  
 DS 4  
 SWH 26315.789 Hz  
 FIDRES 0.200774 Hz  
 AQ 2.4904180 sec  
 RG 5792.6  
 DW 19.000 usec  
 DE 6.00 usec  
 TE 298.2 K  
 D1 2.00000000 sec  
 d11 0.03000000 sec  
 DELTA 1.89999998 sec  
 TDO 1

===== CHANNEL f1 =====  
 NUC1 13C  
 P1 11.00 usec  
 PL1 3.00 dB  
 SFO1 100.5535241 MHz

===== CHANNEL f2 =====  
 CPDPRG2 waltz16  
 NUC2 1H  
 PCPD2 80.00 usec  
 PL2 2.00 dB  
 PL12 16.06 dB  
 PL13 16.06 dB  
 SFO2 399.8515994 MHz

F2 Processing parameters  
 SI 65536  
 SF 100.5423265 MHz  
 SR 36.49 Hz  
 WDW EM  
 SSB 0  
 LB 1.00 Hz  
 GB 0  
 PC 1.40

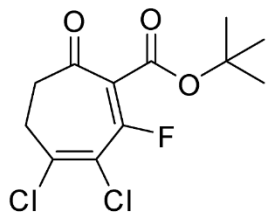

21

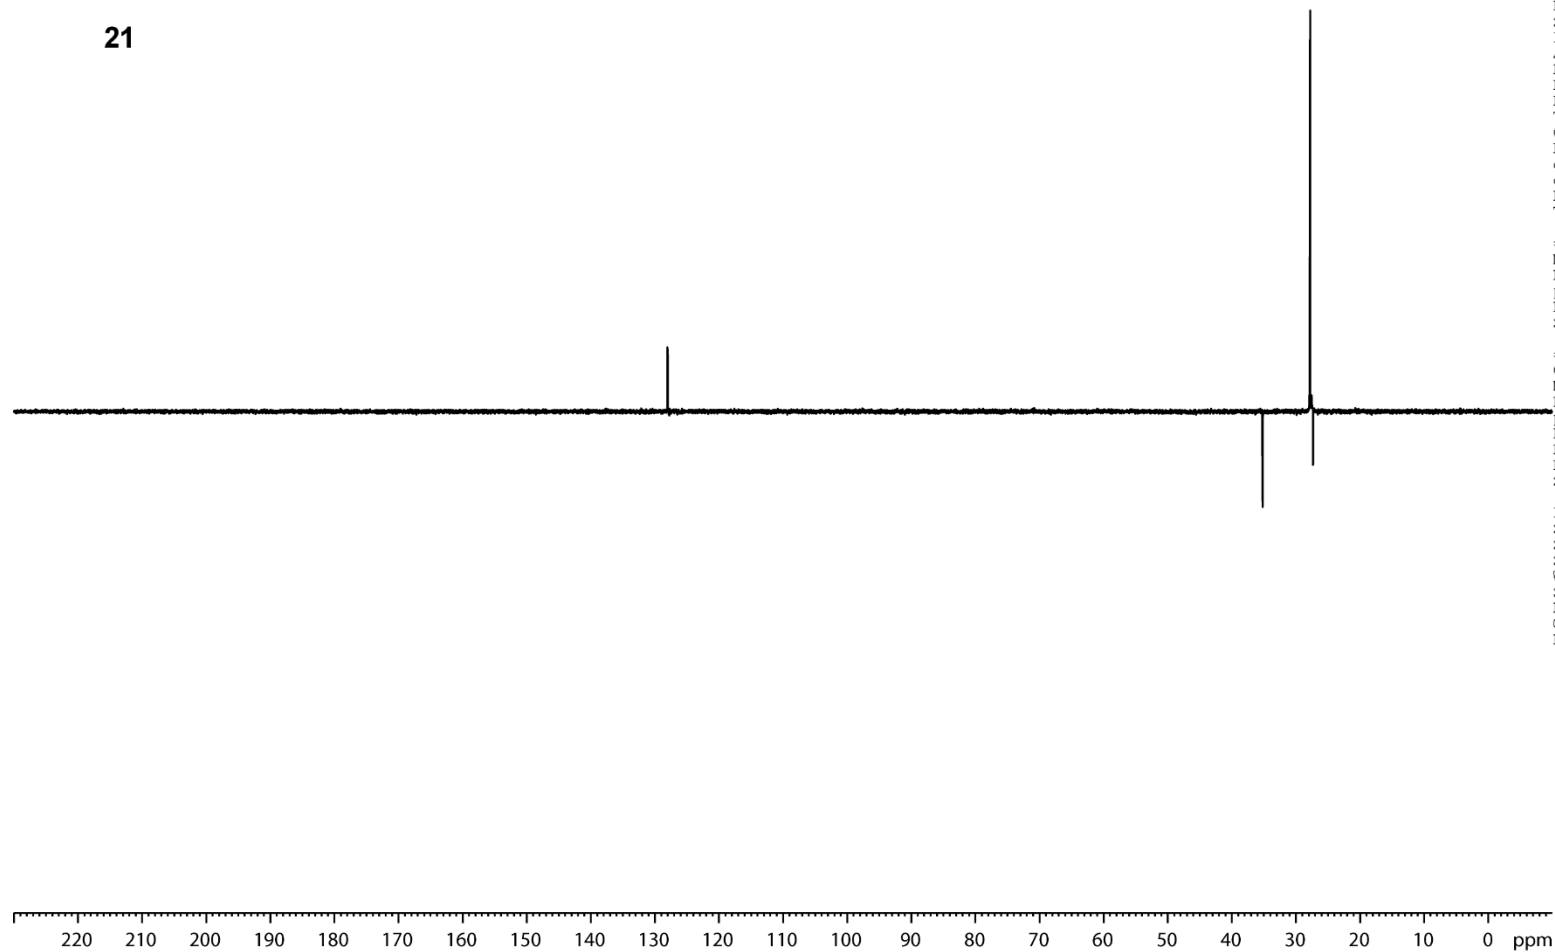

Current Data Parameters  
 NAME rap122192\_od  
 EXPNO 3  
 PROCNO 1

F2 Acquisition Parameters  
 Date\_ 20131009  
 Time 22.17  
 INSTRUM drx400  
 PROBHD 5 mm QNP 1H/13  
 PULPROG dept135  
 TD 131072  
 SOLVENT C6D6  
 NS 1024  
 DS 4  
 SWH 26315.789 Hz  
 FIDRES 0.200774 Hz  
 AQ 2.4904180 sec  
 RG 9195.2  
 DW 19.000 usec  
 DE 7.00 usec  
 TE 297.2 K  
 CNST2 145.0000000  
 D1 2.0000000 sec  
 d2 0.00344828 sec  
 d12 0.00002000 sec  
 DELTA 0.00001401 sec  
 TD0 1

===== CHANNEL f1 =====  
 NUC1 13C  
 P1 11.00 usec  
 p2 23.00 usec  
 PL1 3.00 dB  
 SFO1 100.5535241 MHz

===== CHANNEL f2 =====  
 CPDPRG2 waltz16  
 NUC2 1H  
 P3 10.00 usec  
 p4 20.00 usec  
 PCPD2 80.00 usec  
 PL2 2.00 dB  
 PLL2 16.06 dB  
 SFO2 399.8515994 MHz

F2 Processing parameters  
 SI 65536  
 SF 100.5423561 MHz  
 SR 6.87 Hz  
 WDN EM  
 SSB 0  
 LB 1.00 Hz  
 GB 0  
 PC 1.40

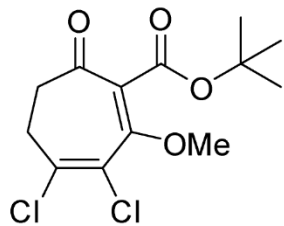

22

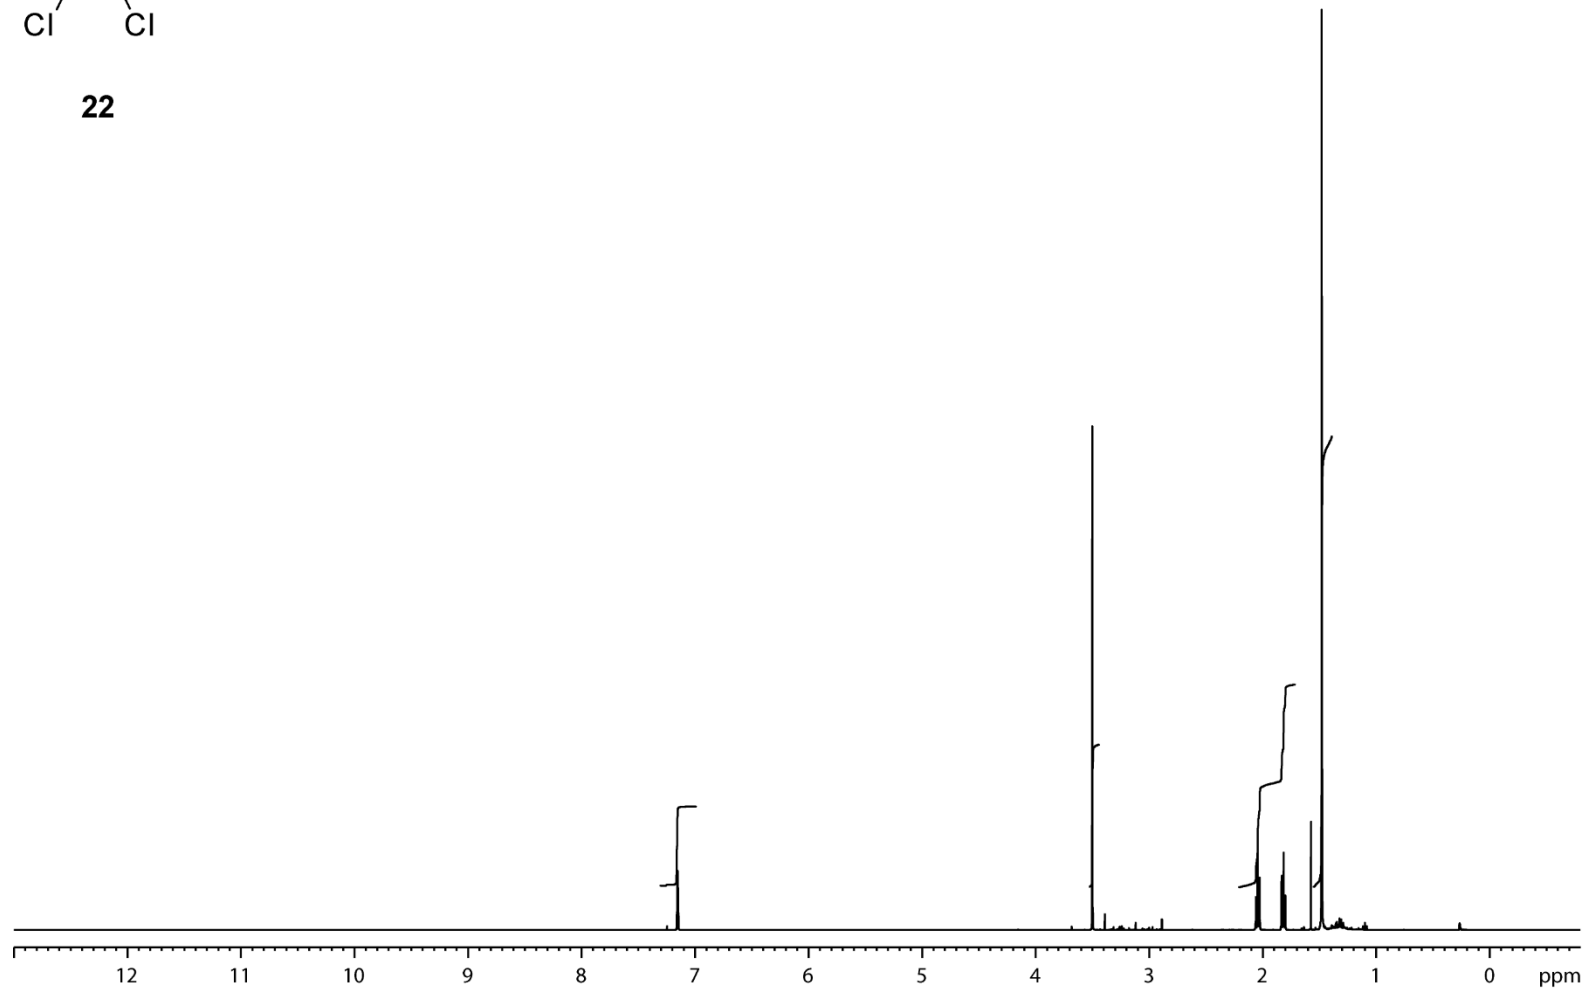

```

NAME      rap122188_od
EXPNO     1
PROCNO    1
Date_     20131009
Time      22.39
INSTRUM   AVIII400
PROBHD    5 mm PABBO BB
PULPROG   zg30
TD         65536
SOLVENT   C6D6
NS         64
DS         2
SWH        8223.685 Hz
FIDRES     0.125483 Hz
AQ         3.9846387 sec
RG         45.2
DW         60.800 usec
DE         6.50 usec
TE         300.0 K
D1         1.00000000 sec
TD0        1
  
```

```

===== CHANNEL f1 =====
NUC1      1H
P1         10.33 usec
PL1        4.00 dB
SFO1      400.4024726 MHz
SI         32768
SF         400.4000945 MHz
SR         94.50 Hz
WDW        EM
SSB        0
LB         0.00 Hz
GB         0
PC         1.40
F1P        13.000 ppm
F2P        0.800 ppm
  
```



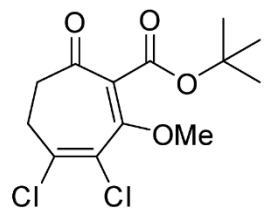

22

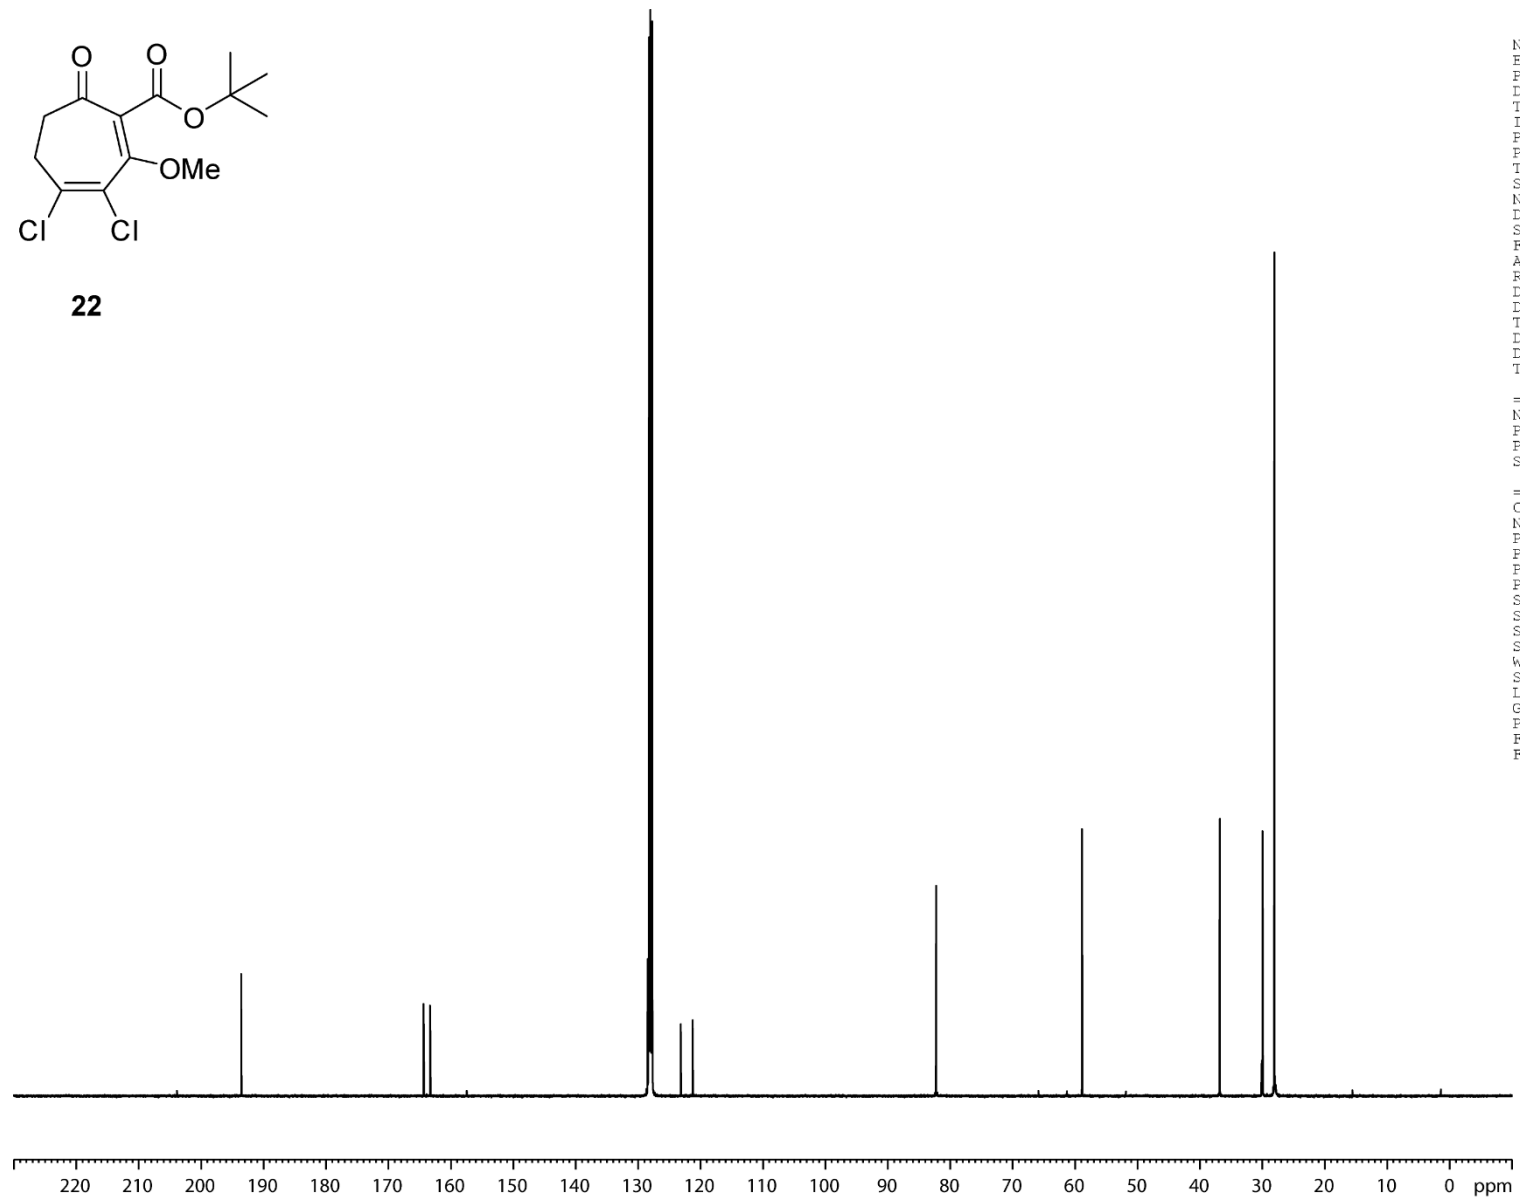

```

NAME      rap122188_od
EXPNO     2
PROCNO    1
Date_     20131010
Time      1.16
INSTRUM   AVIII400
PROBHD    5 mm PABBO BB
PULPROG   zgpg30
TD         131072
SOLVENT   C6D6
NS         2048
DS         4
SMH        26315.789 Hz
FIDRES     0.200774 Hz
AQ         2.4904180 sec
RG         101
DW         19.000 usec
DE         6.50 usec
TE         300.0 K
D1         2.0000000 sec
D11        0.0300000 sec
TD0        1

```

```

===== CHANNEL f1 =====
NUC1      13C
P1         8.50 usec
PL1        3.00 dB
SFO1      100.6918371 MHz

```

```

===== CHANNEL f2 =====
CPDPRG2   waltz16
NUC2       1H
PCPD2      80.00 usec
PL2         4.00 dB
PL12       13.78 dB
PL13       14.00 dB
SFO2      400.4016016 MHz
SI         65536
SF         100.6806254 MHz
SR         35.62 Hz
WDW        EM
SSB         0
LB          1.00 Hz
GB          0
PC          1.40
F1P        230.000 ppm
F2P        10.000 ppm

```

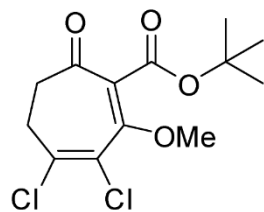

22

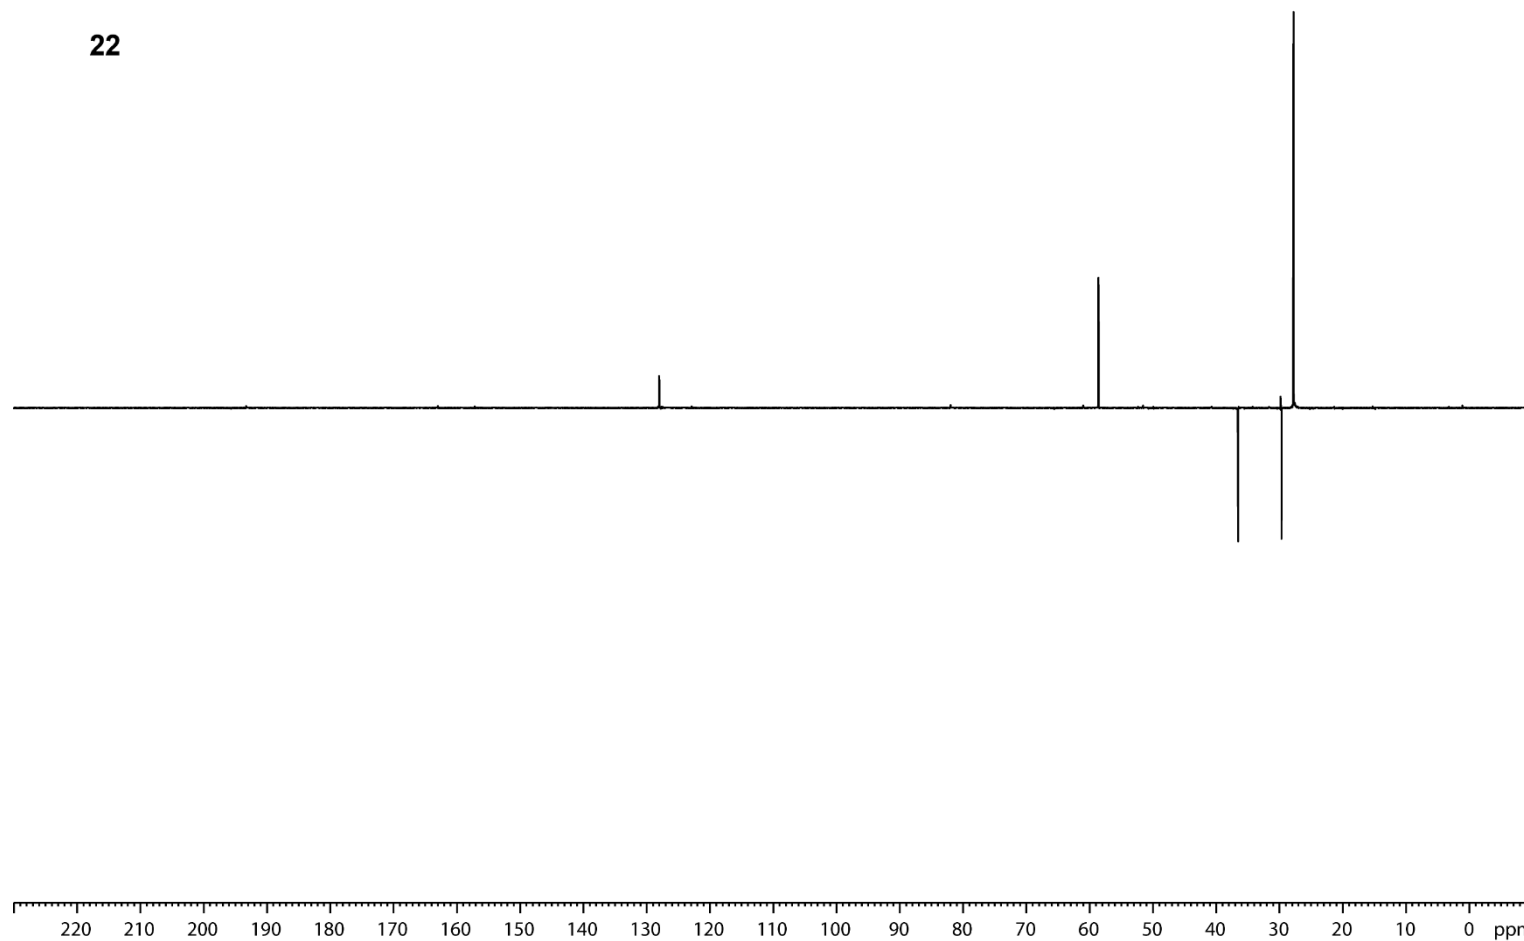

```

NAME      rap122188_od
EXPNO     3
PROCNO    1
Date_     20131010
Time      2.36
INSTRUM   AVIII400
PROBHD    5 mm PABBO BB
PULPROG   dept135
TD         131072
SOLVENT   C6D6
NS         1024
DS         4
SWH        26315.789 Hz
FIDRES     0.200774 Hz
AQ         2.4904180 sec
RG         2050
DW         19.000 usec
DE         6.50 usec
TE         300.0 K
CNST2     145.0000000
D1         2.00000000 sec
D2         0.00344828 sec
D12        0.00002000 sec
TD0        1

===== CHANNEL f1 =====
NUC1       13C
P1         8.50 usec
P2         17.00 usec
PL1        3.00 dB
SFO1       100.6919063 MHz

===== CHANNEL f2 =====
CPDPRG2    waltz16
NUC2       1H
P3         10.33 usec
P4         20.66 usec
PCPD2      80.00 usec
PL2        4.00 dB
PL12       13.78 dB
SFO2       400.4016016 MHz
SI         65536
SF         100.6806551 MHz
SR         5.86 Hz
WDW        EM
SSB        0
LB         1.00 Hz
GB         0
PC         1.40
F1P        230.000 ppm
F2P        10.000 ppm

```

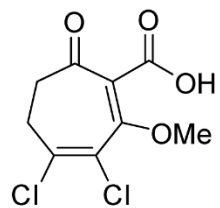

23

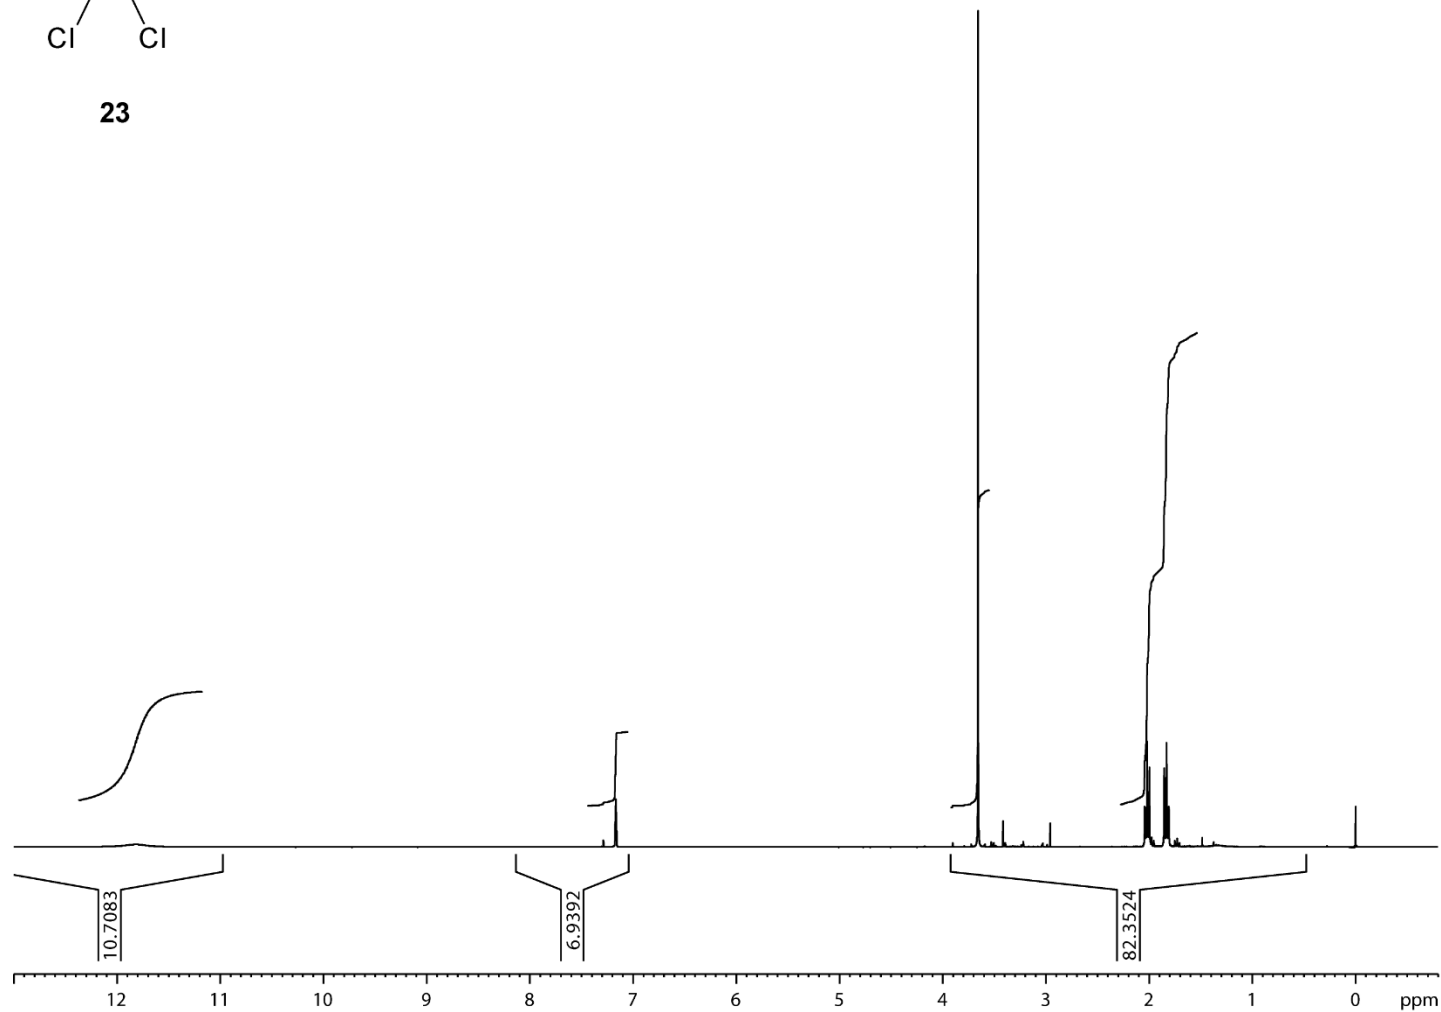

```

NAME rap140409170619_oc
EXPNO 1
PROCNO 1
Date_ 20140409
Time 17.33
INSTRUM av300
PROBHD 5 mm PABBO BB
PULPROG zg30
TD 49152
SOLVENT C6D6
NS 32
DS 2
SWH 6203.474 Hz
FIDRES 0.126210 Hz
AQ 3.9617012 sec
RG 90.5
DW 80.600 usec
DE 6.00 usec
TE 297.2 K
D1 1.0000000 sec
TD0 1

```

```

===== CHANNEL f1 =====
NUC1 1H
P1 12.00 usec
PL1 1.00 dB
SFO1 300.1318530 MHz
SI 32768
SF 300.1299941 MHz
SR 5.92 Hz
WDW EM
SSB 0
LB 0.00 Hz
GB 0
PC 1.40
F1P 13.000 ppm
F2P 0.800 ppm

```

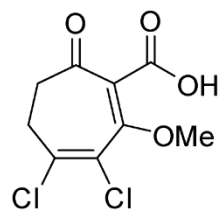

23

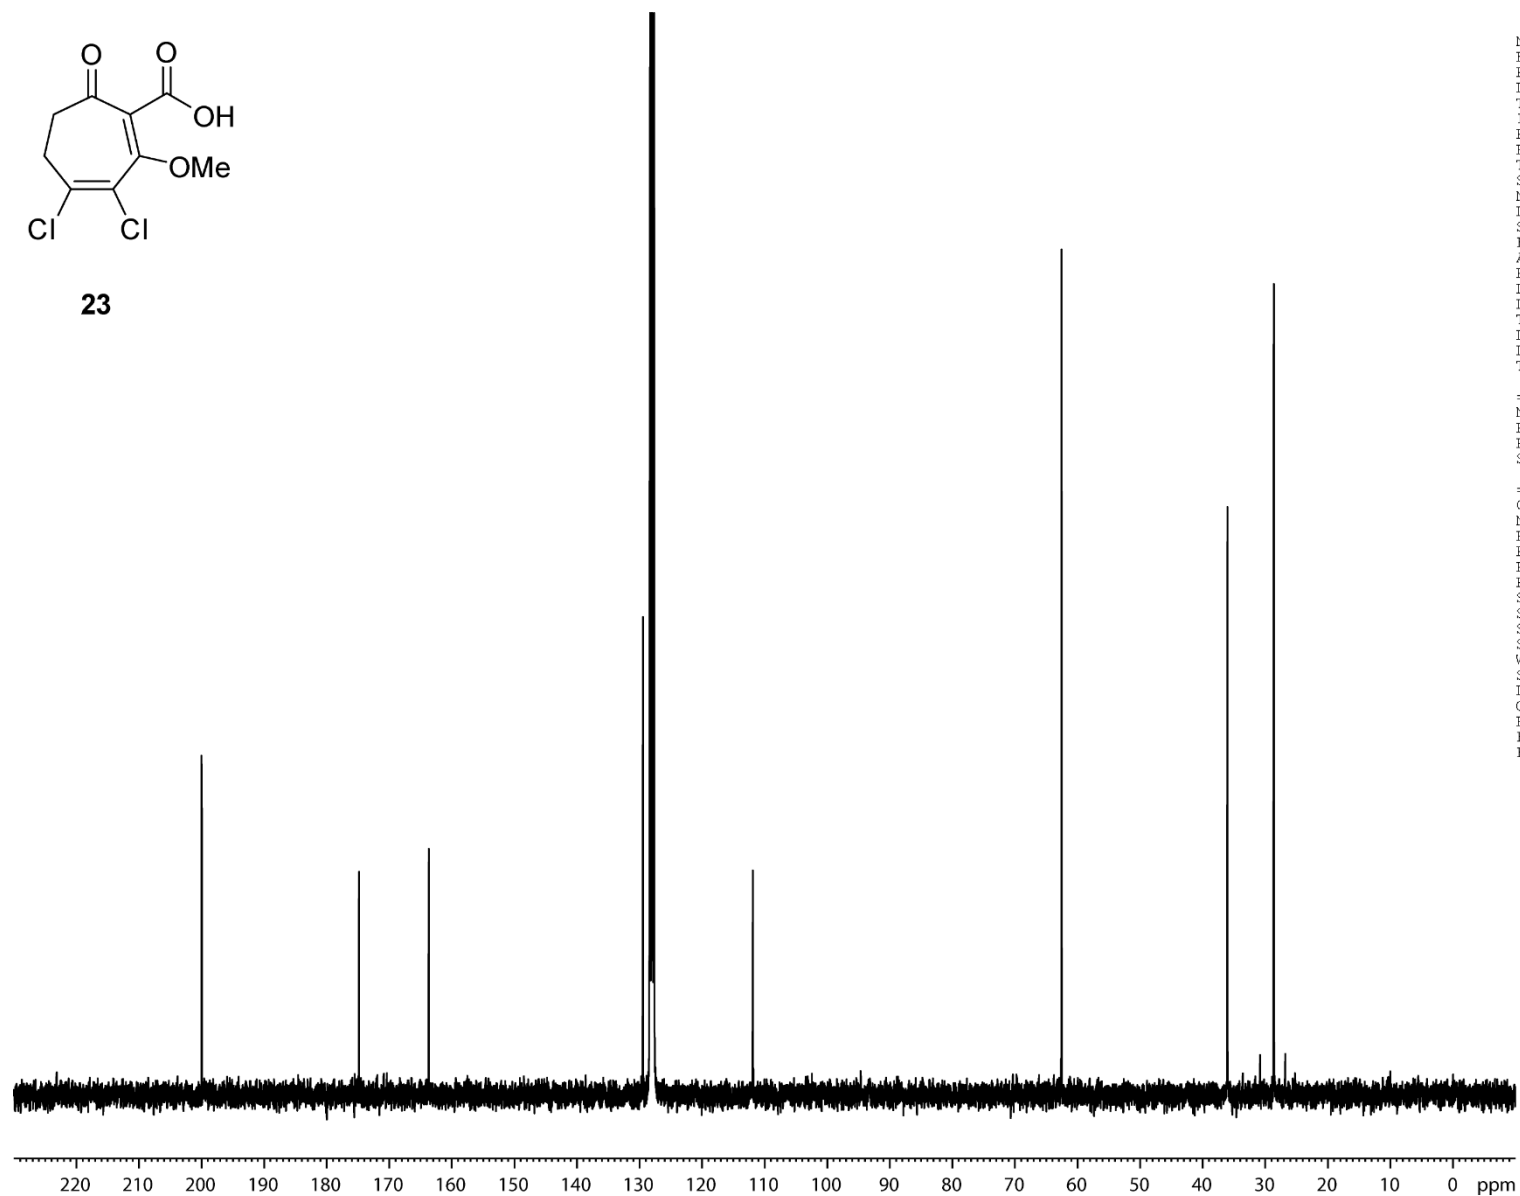

```

NAME rap140409170619_oc
EXPNO 2
PROCNO 1
Date_ 20140409
Time 17.48
INSTRUM av300
PROBHD 5 mm FAEBO BB
PULPROG zgpg30
TD 98304
SOLVENT C6D6
NS 152
DS 4
SWH 19736.842 Hz
FIDRES 0.200774 Hz
AQ 2.4904180 sec
RG 2050
DW 25.333 usec
DE 6.00 usec
TE 298.2 K
D1 2.0000000 sec
D11 0.0300000 sec
TD0 1

```

```

===== CHANNEL f1 =====
NUC1 13C
P1 9.60 usec
PL1 1.00 dB
SFO1 75.4761254 MHz

```

```

===== CHANNEL f2 =====
CPDPRG2 waltz16
NUC2 1H
PCPD2 80.00 usec
PL2 1.00 dB
PL12 15.98 dB
PL13 16.00 dB
SFO2 300.1312005 MHz
SI 65536
SF 75.4677227 MHz
SR 26.31 Hz
WDW EM
SSB 0
LB 1.00 Hz
GB 0
PC 1.40
F1P 230.000 ppm
F2P 10.000 ppm

```

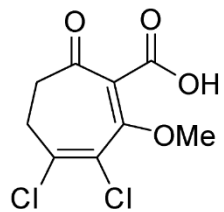

23

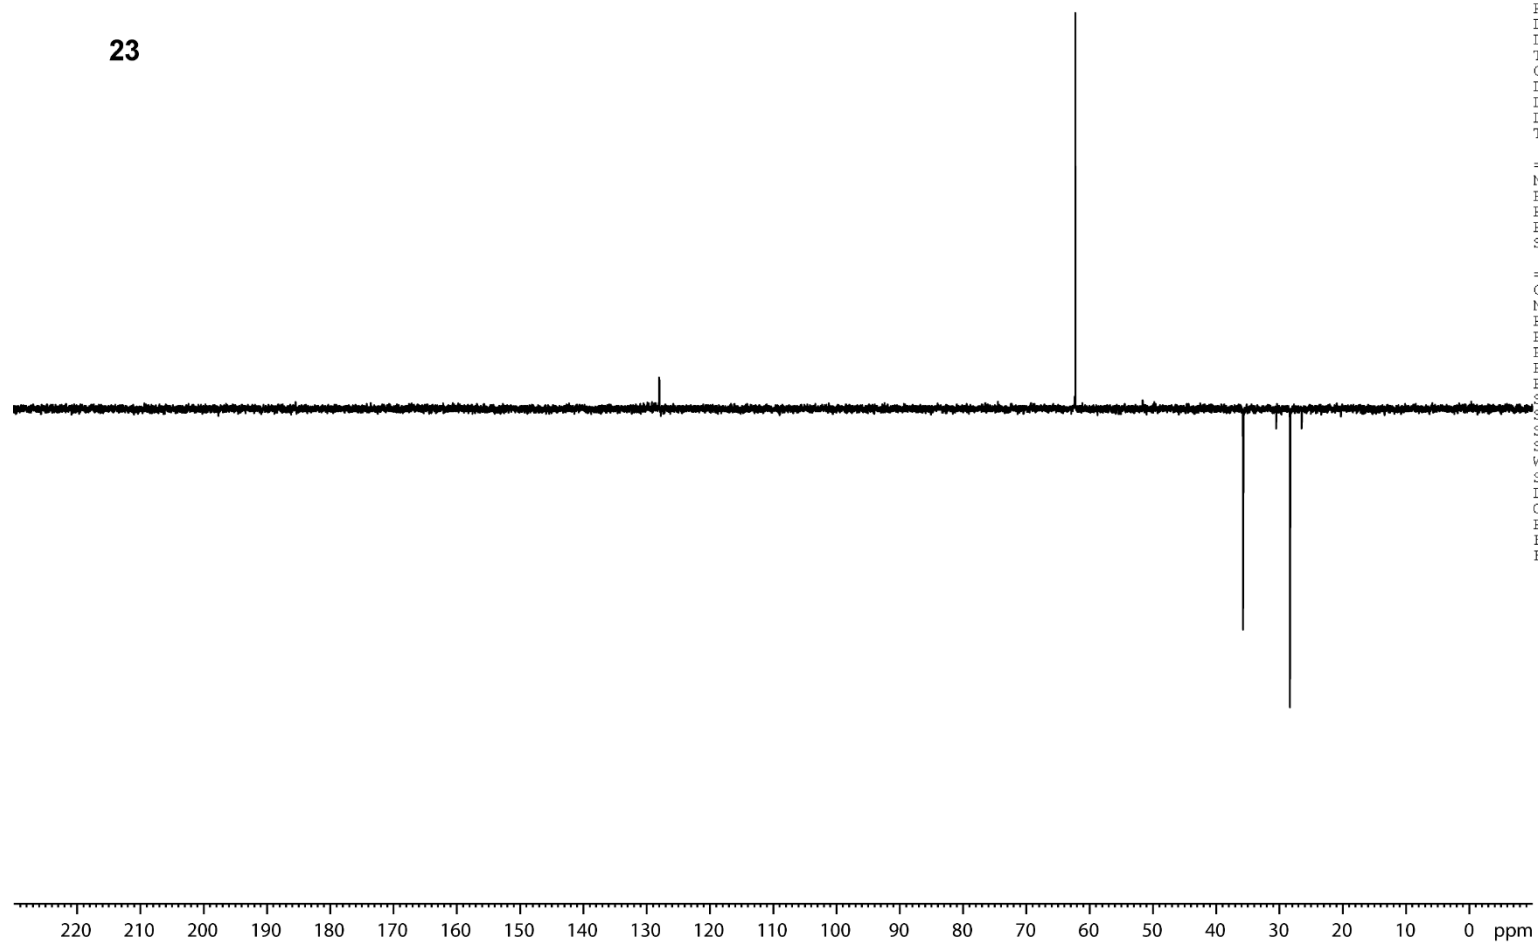

```

NAME rap140409170619_od
EXPNO 3
PROCNO 1
Date_ 20140409
Time 17.56
INSTRUM av300
PROBHD 5 mm PABBO BB
PULPROG dept135
TD 98304
SOLVENT C6D6
NS 76
DS 4
SWH 19736.842 Hz
FIDRES 0.200774 Hz
AQ 2.4904180 sec
RG 1030
DW 25.333 usec
DE 6.00 usec
TE 298.2 K
CNST2 145.0000000
D1 2.00000000 sec
D2 0.00344828 sec
D12 0.00002000 sec
TD0 1

===== CHANNEL f1 =====
NUC1 13C
P1 9.60 usec
P2 19.20 usec
PL1 1.00 dB
SFO1 75.4761254 MHz

===== CHANNEL f2 =====
CPDPRG2 waltz16
NUC2 1H
P3 11.60 usec
P4 23.20 usec
PCPD2 80.00 usec
PL2 1.00 dB
PL12 15.98 dB
SFO2 300.1312005 MHz
SI 65536
SF 75.4677450 MHz
SR 4.03 Hz
WDW EM
SSB 0
LB 1.00 Hz
GB 0
PC 1.40
F1P 230.000 ppm
F2P 10.000 ppm

```
